# Supplementary material for: H-buffer effects boosting H-spillover for efficient hydrogen evolution reaction
Source: Royal Society of Chemistry journal article supplement (doi:10.1039/d4ee01858c), 2024-01-01
Supplement: d4ee01858c1.pdf [file d4ee01858c1.pdf]

## **Supplementary Information**

**H-buffer effects boosting H-spillover for efficient hydrogen evolution reaction**

Yan et al.

## Table of Contents

|                                                                                                                                                                                                                                                                                                                                       |    |
|---------------------------------------------------------------------------------------------------------------------------------------------------------------------------------------------------------------------------------------------------------------------------------------------------------------------------------------|----|
| <b>Methods</b> .....                                                                                                                                                                                                                                                                                                                  | 1  |
| <b>Fig. S1.</b> Schematic illustration of the preparation process for (a) Pt <sub>1</sub> @PC, (b) Pt <sub>1</sub> @POMs@PC, and (c) Pt-POMs/AC.....                                                                                                                                                                                  | 4  |
| <b>Fig. S2.</b> Optimized structural models showing the top view, front view, and side view of Pt <sub>1</sub> @PMO <sub>12</sub> @G-01, Pt <sub>1</sub> @PMO <sub>12</sub> @G-02, and Pt <sub>1</sub> @PMO <sub>12</sub> @G-03 with the Pt atom anchored on the O4H site. ....                                                       | 5  |
| <b>Fig. S3.</b> Optimized structural models showing the top view, front view, and side view of Pt <sub>1</sub> @PMO <sub>12</sub> @G-04, Pt <sub>1</sub> @PMO <sub>12</sub> @G-05, Pt <sub>1</sub> @PMO <sub>12</sub> @G-06, and Pt <sub>1</sub> @PMO <sub>12</sub> @G-07 with the Pt atom anchored on the O3H site.....              | 6  |
| <b>Fig. S4.</b> Optimized structural models showing the top view, front view, and side view of Pt <sub>1</sub> @PW <sub>12</sub> @G-01, Pt <sub>1</sub> @PW <sub>12</sub> @G-02, and Pt <sub>1</sub> @PW <sub>12</sub> @G-03 with the Pt atom anchored at the O4H site.....                                                           | 7  |
| <b>Fig. S5.</b> Optimized structural models showing the top view, front view, and side view of Pt <sub>1</sub> @PW <sub>12</sub> @G-04, Pt <sub>1</sub> @PW <sub>12</sub> @G-05, Pt <sub>1</sub> @PW <sub>12</sub> @G-06, and Pt <sub>1</sub> @PW <sub>12</sub> @G-07 with the Pt atom anchored at the O3H site.....                  | 8  |
| <b>Fig. S6.</b> Optimized structural models showing the top view, front view, and side view of Pt <sub>1</sub> @SiMO <sub>12</sub> @G-01, Pt <sub>1</sub> @SiMO <sub>12</sub> @G-02, and Pt <sub>1</sub> @SiMO <sub>12</sub> @G-03 with the Pt atom anchored at the O4H site. ....                                                    | 9  |
| <b>Fig. S7.</b> Optimized structural models showing the top view, front view, and side view of Pt <sub>1</sub> @SiMO <sub>12</sub> @G-04, Pt <sub>1</sub> @SiMO <sub>12</sub> @G-05, Pt <sub>1</sub> @SiMO <sub>12</sub> @G-06, and Pt <sub>1</sub> @SiMO <sub>12</sub> @G-07 with the Pt atom anchored at the O3H site.....          | 10 |
| <b>Fig. S8.</b> Optimized structural models showing the top view, front view, and side view of Pt <sub>1</sub> @SiW <sub>12</sub> @G-01, Pt <sub>1</sub> @SiW <sub>12</sub> @G-02, and Pt <sub>1</sub> @SiW <sub>12</sub> @G-03 with the Pt atom anchored at the O4H site.....                                                        | 11 |
| <b>Fig. S9.</b> Optimized structural models showing the top view, front view, and side view of Pt <sub>1</sub> @SiW <sub>12</sub> @G-04, Pt <sub>1</sub> @SiW <sub>12</sub> @G-05, Pt <sub>1</sub> @SiW <sub>12</sub> @G-06, and Pt <sub>1</sub> @SiW <sub>12</sub> @G-07 with the Pt atom anchored at the O3H site.....              | 12 |
| <b>Fig. S10.</b> Optimized structural models showing the top view, front view, and side view of non-confined systems (Pt <sub>1</sub> @PMO <sub>12</sub> /G, Pt <sub>1</sub> @PW <sub>12</sub> /G, Pt <sub>1</sub> @SiMO <sub>12</sub> /G, and Pt <sub>1</sub> @SiW <sub>12</sub> /G), with the Pt atom anchored at the O4H site..... | 13 |
| <b>Fig. S11.</b> Binding energies of Pt on O4H or O3H sites exposed on the surface of Pt <sub>1</sub> @POMs@G. There are three exposed O4H sites and four O3H sites in the dual-confinement system. So, the binding energy here is an average value. ....                                                                             | 14 |
| <b>Fig. S12.</b> Optimized structural models showing the top view, front view, and side view of (a) Pt <sub>1</sub> @G(O/POMs) and (b) Pt <sub>1</sub> @G(O).....                                                                                                                                                                     | 15 |

|                                                                                                                                                                                                                                                                                                                                                                                                                                                                                                                                                                                                    |    |
|----------------------------------------------------------------------------------------------------------------------------------------------------------------------------------------------------------------------------------------------------------------------------------------------------------------------------------------------------------------------------------------------------------------------------------------------------------------------------------------------------------------------------------------------------------------------------------------------------|----|
| <b>Fig. S13.</b> The cohesive energies per Pt atom ( $E_{\text{coh-Pt}}$ ) for small Pt clusters or large Pt nanoparticles.....                                                                                                                                                                                                                                                                                                                                                                                                                                                                    | 16 |
| <b>Fig. S14.</b> MD simulation. Total energies of (a) Pt <sub>1</sub> @PMo <sub>12</sub> @G, (b) Pt <sub>1</sub> @PW <sub>12</sub> @G, (c) Pt <sub>1</sub> @SiMo <sub>12</sub> @G, and (d) Pt <sub>1</sub> @SiW <sub>12</sub> @G in 50 ps. Inset: last frame structure of Pt <sub>1</sub> @PMo <sub>12</sub> @G in (a), Pt <sub>1</sub> @PW <sub>12</sub> @G in (b), Pt <sub>1</sub> @SiMo <sub>12</sub> @G in (c), and Pt <sub>1</sub> @SiW <sub>12</sub> @G-01 in (d) after 50 ps MD simulation.....                                                                                             | 17 |
| <b>Fig. S15.</b> XRD patterns of PC, Pt <sub>1</sub> @PC, POMs (viz. PW <sub>12</sub> , PMo <sub>12</sub> , SiW <sub>12</sub> , SiMo <sub>12</sub> ), POMs@PC (viz. PW <sub>12</sub> @PC, PMo <sub>12</sub> @PC, SiW <sub>12</sub> @PC, SiMo <sub>12</sub> @PC), Pt <sub>1</sub> @POMs@PC (viz. Pt <sub>1</sub> @PW <sub>12</sub> @PC, Pt <sub>1</sub> @PMo <sub>12</sub> @PC, Pt <sub>1</sub> @SiW <sub>12</sub> @PC, Pt <sub>1</sub> @SiMo <sub>12</sub> @PC), and Pt@POMs/AC (viz. Pt@PW <sub>12</sub> /AC, Pt@PMo <sub>12</sub> /AC, Pt@SiW <sub>12</sub> /AC, Pt@SiMo <sub>12</sub> /AC)..... | 18 |
| <b>Fig. S16.</b> (a–d) TEM images of PW <sub>12</sub> @PC and corresponding EDS mapping images of C, O, P, and W elements. (e–h) TEM images of Pt <sub>1</sub> @PW <sub>12</sub> @PC and the corresponding EDS mapping images of C, O, P, W, and Pt elements.....                                                                                                                                                                                                                                                                                                                                  | 19 |
| <b>Fig. S17.</b> (a–d) TEM images of PMo <sub>12</sub> @PC and corresponding EDS mapping images of C, O, P, and Mo elements. (e–h) TEM images of Pt <sub>1</sub> @PMo <sub>12</sub> @PC and corresponding EDS mapping images of C, O, P, Mo, and Pt elements.....                                                                                                                                                                                                                                                                                                                                  | 20 |
| <b>Fig. S18.</b> (a–d) TEM images of SiW <sub>12</sub> @PC and corresponding EDS mapping images of C, O, Si, and W elements. (e–h) TEM images of Pt <sub>1</sub> @SiW <sub>12</sub> @PC and corresponding EDS mapping images of C, O, Si, W, and Pt elements.....                                                                                                                                                                                                                                                                                                                                  | 21 |
| <b>Fig. S19.</b> (a–d) TEM images of SiMo <sub>12</sub> @PC and corresponding EDS mapping images of C, O, Si, and Mo elements. (e–h) TEM images of Pt <sub>1</sub> @SiMo <sub>12</sub> @PC and corresponding EDS mapping images of C, O, Si, Mo, and Pt elements.....                                                                                                                                                                                                                                                                                                                              | 22 |
| <b>Fig. S20.</b> HAADF-STEM images of (a) PC, (b) PMo <sub>12</sub> @PC, and (c) PW <sub>12</sub> @PC.....                                                                                                                                                                                                                                                                                                                                                                                                                                                                                         | 23 |
| <b>Fig. S21.</b> CV curves of (a) pure PW <sub>12</sub> solution, (b) pure PMo <sub>12</sub> solution, (c) pure SiW <sub>12</sub> solution, and (d) pure SiMo <sub>12</sub> solution in 0.5 M H <sub>2</sub> SO <sub>4</sub> at 40 mV s <sup>-1</sup> . (e–h) CV curves of PC, POMs/AC, and POMs@PC in 0.5 M H <sub>2</sub> SO <sub>4</sub> at 40 mV s <sup>-1</sup> .....                                                                                                                                                                                                                         | 24 |
| <b>Fig. S22.</b> HAADF-STEM images of (a) Pt <sub>1</sub> @PMo <sub>12</sub> @PC and (b) Pt <sub>1</sub> @PW <sub>12</sub> @PC.....                                                                                                                                                                                                                                                                                                                                                                                                                                                                | 25 |
| <b>Fig. S23.</b> HAADF-STEM image of Pt <sub>1</sub> @PC. Enlarged HAADF-STEM image of the square region in a <sub>1</sub> .....                                                                                                                                                                                                                                                                                                                                                                                                                                                                   | 26 |
| <b>Fig. S24.</b> HAADF-STEM images of (a), (b) Pt <sub>1</sub> @PMo <sub>12</sub> @PC, (c), (d) Pt <sub>1</sub> @PW <sub>12</sub> @PC, and (e), (f) Pt <sub>1</sub> @PC.....                                                                                                                                                                                                                                                                                                                                                                                                                       | 27 |
| <b>Fig. S25.</b> TEM images of Pt <sub>1</sub> @PC and corresponding EDS mapping images of C, O, and Pt elements.....                                                                                                                                                                                                                                                                                                                                                                                                                                                                              | 28 |
| <b>Fig. S26.</b> (a–d) TEM images of Pt-PW <sub>12</sub> /AC and corresponding EDS mapping images of C, O, P, W, and Pt elements. (e–h) TEM images of Pt-PMo <sub>12</sub> /AC and corresponding EDS mapping images of C, O, P, Mo, and Pt elements. TEM images of (i–k) Pt-SiW <sub>12</sub> /AC and (l–n) Pt-SiMo <sub>12</sub> /AC.....                                                                                                                                                                                                                                                         | 29 |

|                                                                                                                                                                                                                                                                                                   |    |
|---------------------------------------------------------------------------------------------------------------------------------------------------------------------------------------------------------------------------------------------------------------------------------------------------|----|
| <b>Fig. S27.</b> (a) N <sub>2</sub> sorption isotherms. (b) Pore size distributions calculated by non-local density functional theory (NLDFT).....                                                                                                                                                | 30 |
| <b>Fig. S28.</b> XPS survey spectra of Pt <sub>1</sub> @PC and Pt <sub>1</sub> @POMs@PC. ....                                                                                                                                                                                                     | 31 |
| <b>Fig. S29.</b> The high-resolution XPS spectra of Pt <sub>1</sub> @PC and Pt <sub>1</sub> @POMs@PC in (a) O 1s and (b) C 1s regions. ....                                                                                                                                                       | 32 |
| <b>Fig. S30.</b> EXAFS fitting curves of Pt <sub>1</sub> @PMO <sub>12</sub> @PC, Pt <sub>1</sub> @PC, Pt-foil, and PtO <sub>2</sub> at Pt L3-edge of (a), (c), (e), (g) R-space and (b), (d), (f), (h) k-space, respectively. ....                                                                | 33 |
| <b>Fig. S31.</b> (a) Schematic illustration of Pt <sub>1</sub> @PC. (b) Optimized structural models showing the top view, front view, and side view of PtCl <sub>3</sub> -O <sub>2</sub> @G. ....                                                                                                 | 34 |
| <b>Fig. S32.</b> CV curves of (a) 20% Pt/C, (b) Pt <sub>1</sub> @PC, (c)–(f) Pt-POMs/AC and Pt <sub>1</sub> @POMs@PC in 0.5 M H <sub>2</sub> SO <sub>4</sub> at 40 mV s <sup>-1</sup> .....                                                                                                       | 35 |
| <b>Fig. S33.</b> The high-resolution XPS spectra of (a) W 4f and (b) Mo 3d.....                                                                                                                                                                                                                   | 36 |
| <b>Fig. S34.</b> EXAFS fitting curves of Pt <sub>1</sub> @PMO <sub>12</sub> @PC, Mo-foil, and MoO <sub>3</sub> at Mo K-edge of (a), (c), (e) R-space and (b), (d), (f) k-space, respectively. ....                                                                                                | 37 |
| <b>Fig. S35.</b> Wavelet-transform images of (a) Pt-foil and (b) PtO <sub>2</sub> at Pt L3-edge and (c) Mo-foil at Mo K-edge. ....                                                                                                                                                                | 38 |
| <b>Fig. S36.</b> (a–d) LSV curves of the Pt <sub>x</sub> @POMs@PC in 0.5 M H <sub>2</sub> SO <sub>4</sub> solution at 40 mV s <sup>-1</sup> (x represents the molar ratio of Pt and POMs). (e) The overpotentials at 10 mA cm <sup>-2</sup> of Pt <sub>x</sub> @POMs@PC. ....                     | 39 |
| <b>Fig. S37.</b> (a–d) TEM images of Pt <sub>1.4</sub> @PW <sub>12</sub> @PC and corresponding EDS mapping images of C, O, P, W, and Pt elements. (e–h) TEM images of Pt <sub>1.4</sub> @PMO <sub>12</sub> @PC and corresponding EDS mapping images of C, O, P, Mo, and Pt elements. ....         | 40 |
| <b>Fig. S38.</b> (a–d) TEM images of Pt <sub>1.4</sub> @SiW <sub>12</sub> @PC and corresponding EDS mapping images of C, O, Si, W, and Pt elements. (e–h) TEM images of Pt <sub>1.4</sub> @SiMO <sub>12</sub> @PC and corresponding EDS mapping images of C, O, Si, Mo, and Pt elements. ....     | 41 |
| <b>Fig. S39.</b> (a)–(k) Cyclic voltammetry curves in the region of 0.65–0.75 V (vs. SCE) of samples with different scan rates from 5 to 200 mV s <sup>-1</sup> in 0.5 M H <sub>2</sub> SO <sub>4</sub> . (l) Calculated capacitive currents at 0.7 V (vs. SCE) as a function of scan rates. .... | 42 |
| <b>Fig. S40.</b> Mass activity values of Pt <sub>1</sub> @POMs@PC, Pt <sub>1</sub> @PC, and 20% Pt/C in 0.5 M H <sub>2</sub> SO <sub>4</sub> . .43                                                                                                                                                |    |
| <b>Fig. S41.</b> Comparison of mass activity at η <sub>30</sub> for Pt/POMs-contained composite catalysts in HER. ....                                                                                                                                                                            | 44 |
| <b>Fig. S42.</b> Polarization curves of Pt <sub>1</sub> @PW <sub>12</sub> @PC catalyst in aqueous 0.5 M H <sub>2</sub> SO <sub>4</sub> and 0.5 M D <sub>2</sub> SO <sub>4</sub> solutions. The inset is the kinetic isotope effect value vs. potential.....                                       | 45 |
| <b>Fig. S43.</b> Hydrogen desorption region of the steady-state cyclic voltammetry curves for Pt-POMs/AC at a scan rate of 50 mV s <sup>-1</sup> .....                                                                                                                                            | 46 |



|                                                                                                                                                                                                                                                                                                                                                                                                                                                                                                                                                                                                                                                                            |    |
|----------------------------------------------------------------------------------------------------------------------------------------------------------------------------------------------------------------------------------------------------------------------------------------------------------------------------------------------------------------------------------------------------------------------------------------------------------------------------------------------------------------------------------------------------------------------------------------------------------------------------------------------------------------------------|----|
| <b>Fig. S44.</b> The pH-dependence measurements. LSV curves of (a) Pt <sub>1</sub> @PMo <sub>12</sub> @PC, (b) Pt <sub>1</sub> @PW <sub>12</sub> @PC, and (c) Pt <sub>1</sub> @PC in Ar-saturated H <sub>2</sub> SO <sub>4</sub> electrolyte with pH ranging from 0 to 0.699. ....                                                                                                                                                                                                                                                                                                                                                                                         | 47 |
| <b>Fig. S45.</b> Example of Ohmic drop-corrected HER polarization curves and Tafel plots for Pt <sub>1</sub> @PMo <sub>12</sub> @PC (a, b) and Pt <sub>1</sub> @PC (c, d) in 0.5 M H <sub>2</sub> SO <sub>4</sub> at four different temperatures, recorded using hydrodynamic LSV using a scan rate of 5 mV s <sup>-1</sup> with 1600 rpm. (e) The Arrhenius plot for HER on Pt <sub>1</sub> @PMo <sub>12</sub> @PC and Pt <sub>1</sub> @PC in 0.5 M H <sub>2</sub> SO <sub>4</sub> . (f) Relation between activation energy ( $E_{act}$ ) and the logarithm of pre-exponential factor (log A) as an illustration of the compensation effect for HER in acidic media. .... | 48 |
| <b>Fig. S46.</b> Schematic representation of the rate law “dissection” with an indication of the relevant parameters that could be potentially linked with material properties or interfacial properties of the electrode/electrolyte boundary in acid <sup>20</sup> . ....                                                                                                                                                                                                                                                                                                                                                                                                | 49 |
| <b>Fig. S47.</b> (a) Schematic diagram of the electrode structure and the equivalent circuit model. (b) Equivalent circuit model of intermediate adsorption. ....                                                                                                                                                                                                                                                                                                                                                                                                                                                                                                          | 50 |
| <b>Fig. S48.</b> Nyquist plots of Pt <sub>1</sub> @PC at different overpotentials. The inside is a zoomed-in view. ....                                                                                                                                                                                                                                                                                                                                                                                                                                                                                                                                                    | 51 |
| <b>Fig. S49.</b> Nyquist plots of Pt <sub>1</sub> @POMs@PC and Pt-POMs/AC at different overpotentials. The inside is a zoomed-in view. ....                                                                                                                                                                                                                                                                                                                                                                                                                                                                                                                                | 52 |
| <b>Fig. S50.</b> Bode plots of Pt <sub>1</sub> @POMs@PC (Pt <sub>1</sub> @PW <sub>12</sub> @PC, Pt <sub>1</sub> @SiMo <sub>12</sub> @PC, and Pt <sub>1</sub> @SiW <sub>12</sub> @PC) and Pt-POMs/AC (Pt-PW <sub>12</sub> /AC, Pt-SiW <sub>12</sub> /AC, and Pt-SiMo <sub>12</sub> /AC) at various overpotentials. ....                                                                                                                                                                                                                                                                                                                                                     | 53 |
| <b>Fig. S51.</b> Optimized structural models showing the top view of (a) Pt <sub>1</sub> @PMo <sub>12</sub> @G-01, (b) Pt <sub>1</sub> @PMo <sub>12</sub> @G-02, and (c) Pt <sub>1</sub> @PMo <sub>12</sub> @G-03. H adsorption free energy maps for HER on (d) Pt <sub>1</sub> @PMo <sub>12</sub> @G-01, (e) Pt <sub>1</sub> @PMo <sub>12</sub> @G-02, and (f) Pt <sub>1</sub> @PMo <sub>12</sub> @G-03. Corresponding 3D contour of $\Delta G_{H^*}$ on (g) Pt <sub>1</sub> @PMo <sub>12</sub> @G-02, (h) Pt <sub>1</sub> @PMo <sub>12</sub> @G-02, and (i) Pt <sub>1</sub> @PMo <sub>12</sub> @G-03. ....                                                               | 54 |
| <b>Fig. S52.</b> Optimized structural models showing the top view of (a) Pt <sub>1</sub> @PW <sub>12</sub> @G-01, (b) Pt <sub>1</sub> @PW <sub>12</sub> @G-02, and (c) Pt <sub>1</sub> @PW <sub>12</sub> @G-03. H adsorption free energy maps for HER on (d) Pt <sub>1</sub> @PW <sub>12</sub> @G-01, (e) Pt <sub>1</sub> @PW <sub>12</sub> @G-02, and (f) Pt <sub>1</sub> @PW <sub>12</sub> @G-03. Corresponding 3D contour of $\Delta G_{H^*}$ on (g) Pt <sub>1</sub> @PW <sub>12</sub> @G-01, (h) Pt <sub>1</sub> @PW <sub>12</sub> @G-02, and (i) Pt <sub>1</sub> @PW <sub>12</sub> @G-03. ....                                                                        | 55 |
| <b>Fig. S53.</b> Optimized structural models showing the top view of (a) Pt <sub>1</sub> @SiMo <sub>12</sub> @G-01, (b) Pt <sub>1</sub> @SiMo <sub>12</sub> @G-02, and (c) Pt <sub>1</sub> @SiMo <sub>12</sub> @G-03. H adsorption free energy maps for HER on (d) Pt <sub>1</sub> @SiMo <sub>12</sub> @G-01, (e) Pt <sub>1</sub> @SiMo <sub>12</sub> @G-02, and (f) Pt <sub>1</sub> @SiMo <sub>12</sub> @G-03. 3D contour of $\Delta G_{H^*}$ on (g) Pt <sub>1</sub> @SiMo <sub>12</sub> @G-01, (h) Pt <sub>1</sub> @SiMo <sub>12</sub> @G-02, and (i) Pt <sub>1</sub> @SiMo <sub>12</sub> @G-03. ....                                                                    | 56 |
| <b>Fig. S54.</b> Optimized structural models showing the top view of (a) Pt <sub>1</sub> @SiW <sub>12</sub> @G-01, (b) Pt <sub>1</sub> @SiW <sub>12</sub> @G-02, and (c) Pt <sub>1</sub> @SiW <sub>12</sub> @G-03. H adsorption free energy maps for HER on (d) Pt <sub>1</sub> @SiW <sub>12</sub> @G-01, (e) Pt <sub>1</sub> @SiW <sub>12</sub> @G-02, and (f) Pt <sub>1</sub> @SiW <sub>12</sub> @G-03. Corresponding 3D                                                                                                                                                                                                                                                 |    |

|                                                                                                                                                                                                                                                                                                                                                                                                                                                                                                                                                                      |    |
|----------------------------------------------------------------------------------------------------------------------------------------------------------------------------------------------------------------------------------------------------------------------------------------------------------------------------------------------------------------------------------------------------------------------------------------------------------------------------------------------------------------------------------------------------------------------|----|
| contour of $\Delta G_{H^*}$ on (g) Pt <sub>1</sub> @SiW <sub>12</sub> @G-01, (h) Pt <sub>1</sub> @SiW <sub>12</sub> @G-02, and (i) Pt <sub>1</sub> @SiW <sub>12</sub> @G-03.<br>.....                                                                                                                                                                                                                                                                                                                                                                                | 57 |
| <b>Fig. S55.</b> Optimized structural models showing the top view of (a) Pt <sub>1</sub> @PW <sub>12</sub> /G, (b) Pt <sub>1</sub> @SiW <sub>12</sub> /G, and (c) Pt <sub>1</sub> @SiMo <sub>12</sub> /G. H* adsorption free energy maps for HER on (d) Pt <sub>1</sub> @PW <sub>12</sub> /G, (e) Pt <sub>1</sub> @SiW <sub>12</sub> /G, and (f) Pt <sub>1</sub> @SiMo <sub>12</sub> /G. 3D contour of $\Delta G_{H^*}$ on (g) Pt <sub>1</sub> @PW <sub>12</sub> /G, (h) Pt <sub>1</sub> @SiW <sub>12</sub> /G, and (i) Pt <sub>1</sub> @SiMo <sub>12</sub> /G. .... | 58 |
| <b>Fig. S56.</b> (a, d, g, j) Optimized structural models showing the top view of Pt <sub>1</sub> @POMs@G. (b, e, h, k) H adsorption free energy maps for HER. (c, f, i, l) contour plots of PES resulting from the panel. Saddle points representing TS are marked with red dots in contour plots. ....                                                                                                                                                                                                                                                             | 59 |
| <b>Fig. S57.</b> Schematic illustration of typical hydrogen spillover paths on (a) Pt <sub>1</sub> @PMo <sub>12</sub> @G-02, (b) Pt <sub>1</sub> @PMo <sub>12</sub> @G-03, (c) Pt <sub>1</sub> @PW <sub>12</sub> @G-02, (d) Pt <sub>1</sub> @PW <sub>12</sub> @G-03, (e) Pt <sub>1</sub> @SiMo <sub>12</sub> @G-02, (f) Pt <sub>1</sub> @SiMo <sub>12</sub> @G-03, (g) Pt <sub>1</sub> @SiW <sub>12</sub> @G-02, and (h) Pt <sub>1</sub> @SiMo <sub>12</sub> @G-03 for HER in acid.....                                                                              | 60 |
| <b>Fig. S58.</b> Typical free energy diagram for HER on Pt <sub>1</sub> @POMs/G. ....                                                                                                                                                                                                                                                                                                                                                                                                                                                                                | 61 |
| <b>Fig. S59.</b> Schematic illustration of hydrogen spillover path at atomic-scale on the (a) Pt <sub>1</sub> @PMo <sub>12</sub> @G-02 and (b) Pt <sub>1</sub> @PMo <sub>12</sub> @G-03; Inset are typical free energy diagrams for HER on (a) Pt <sub>1</sub> @PMo <sub>12</sub> @G-02 and (b) Pt <sub>1</sub> @PMo <sub>12</sub> @G-03. ....                                                                                                                                                                                                                       | 62 |
| <b>Fig. S60.</b> Schematic illustration of hydrogen spillover paths at atomic-scale on the (a) Pt <sub>1</sub> @PW <sub>12</sub> @G-01, (b) Pt <sub>1</sub> @PW <sub>12</sub> @G-02, and (c) Pt <sub>1</sub> @PW <sub>12</sub> @G-03; Inset are typical free energy diagrams for HER on (a) Pt <sub>1</sub> @PW <sub>12</sub> @G-01, (b) Pt <sub>1</sub> @PW <sub>12</sub> @G-02, and (c) Pt <sub>1</sub> @PW <sub>12</sub> @G-03. ....                                                                                                                              | 63 |
| <b>Fig. S61.</b> Schematic illustration of hydrogen spillover paths at atomic-scale on the (a) Pt <sub>1</sub> @SiMo <sub>12</sub> @G-01, (b) Pt <sub>1</sub> @SiMo <sub>12</sub> @G-02, and (c) Pt <sub>1</sub> @SiMo <sub>12</sub> @G-03; Inset are typical free energy diagrams for HER on (a) Pt <sub>1</sub> @SiMo <sub>12</sub> @G-01, (b) Pt <sub>1</sub> @SiMo <sub>12</sub> @G-02, and (c) Pt <sub>1</sub> @SiMo <sub>12</sub> @G-03.....                                                                                                                   | 64 |
| <b>Fig. S62.</b> Schematic illustration of hydrogen spillover path at atomic-scale on the (a) Pt <sub>1</sub> @SiW <sub>12</sub> @G-01, (b) Pt <sub>1</sub> @SiW <sub>12</sub> @G-02, and (c) Pt <sub>1</sub> @SiW <sub>12</sub> @G-03; Inset are typical free energy diagrams for HER on (a) Pt <sub>1</sub> @SiW <sub>12</sub> @G-01, (b) Pt <sub>1</sub> @SiW <sub>12</sub> @G-02, and (c) Pt <sub>1</sub> @SiW <sub>12</sub> @G-03. ....                                                                                                                         | 65 |
| <b>Fig. S63.</b> Typical free energy diagram for HER on PtCl <sub>3</sub> -O <sub>2</sub> @G. ....                                                                                                                                                                                                                                                                                                                                                                                                                                                                   | 66 |
| <b>Fig. S64.</b> Differential charge densities for (a) Pt <sub>1</sub> @PW <sub>12</sub> @G, (b) Pt <sub>1</sub> @SiW <sub>12</sub> @G, and (c) Pt <sub>1</sub> @SiMo <sub>12</sub> @G.....                                                                                                                                                                                                                                                                                                                                                                          | 67 |
| <b>Fig. S65.</b> Differential charge densities for (a) Pt <sub>1</sub> @PW <sub>12</sub> /G, (b) Pt <sub>1</sub> @SiW <sub>12</sub> /G, (c) Pt <sub>1</sub> @PMo <sub>12</sub> /G, and (d) Pt <sub>1</sub> @SiMo <sub>12</sub> /G. ....                                                                                                                                                                                                                                                                                                                              | 68 |
| <b>Fig. S66.</b> The differential charge density for PtCl <sub>3</sub> -O <sub>2</sub> @G.....                                                                                                                                                                                                                                                                                                                                                                                                                                                                       | 69 |
| <b>Fig. S67.</b> Comparison of Pt/POMs-contained composite catalysts for HER.....                                                                                                                                                                                                                                                                                                                                                                                                                                                                                    | 70 |
| <b>Fig. S68.</b> RHE calibration of SCE reference electrode in 0.5 M H <sub>2</sub> SO <sub>4</sub> . ....                                                                                                                                                                                                                                                                                                                                                                                                                                                           | 71 |
| <b>Table S1.</b> Binding energies of Pt atom in supports. ....                                                                                                                                                                                                                                                                                                                                                                                                                                                                                                       | 72 |

|                                                                                                                                                                              |    |
|------------------------------------------------------------------------------------------------------------------------------------------------------------------------------|----|
| <b>Table S2.</b> The geometry parameters of POMs and Pt atoms confined in O4H sites of POMs@G and POMs/G.....                                                                | 73 |
| <b>Table S3.</b> EXAFS curve fitting parameters at the Pt L3-edge for various samples.....                                                                                   | 74 |
| <b>Table S4.</b> EXAFS curve fitting parameters at the Mo K-edge for various samples.....                                                                                    | 75 |
| <b>Table S5.</b> The $C_{dl}$ and ECSA values of all samples. ....                                                                                                           | 76 |
| <b>Table S6.</b> Exchange current densities extracted for HER in 0.5 M H <sub>2</sub> SO <sub>4</sub> .....                                                                  | 77 |
| <b>Table S7.</b> The HER activities of Pt <sub>1</sub> @POMs@PC compared with other recently reported Pt single atom catalysts in 0.5 M H <sub>2</sub> SO <sub>4</sub> ..... | 78 |
| <b>Table S8.</b> The HER activities of recently reported catalysts with hydrogen spillover effect.....                                                                       | 79 |
| <b>Table S9.</b> Comparison of Pt/POMs-contained composite catalysts for HER.....                                                                                            | 80 |
| <b>Table S10.</b> Fitted data of EIS Nyquist plots by the equivalent circuit for Pt <sub>1</sub> @PC, Pt <sub>1</sub> @POMs@PC, and Pt-POMs/AC. ....                         | 81 |
| <b>Table S11.</b> Electron transfer based on Hirshfeld population analysis. ....                                                                                             | 83 |
| <b>Table S12.</b> Contents of Pt and M (Mo or W) in Pt <sub>1</sub> @PC and Pt <sub>1</sub> @POMs@PC by ICP-OES. ...                                                         | 84 |
| <b>Table S13.</b> The calculated elemental compositions by XPS spectra.....                                                                                                  | 85 |
| <b>Note S1</b> .....                                                                                                                                                         | 86 |
| <b>Note S2</b> .....                                                                                                                                                         | 87 |
| <b>Note S3</b> .....                                                                                                                                                         | 88 |
| <b>Note S4</b> .....                                                                                                                                                         | 89 |
| <b>Note S5</b> .....                                                                                                                                                         | 90 |
| <b>Note S6</b> .....                                                                                                                                                         | 91 |
| <b>Note S7</b> .....                                                                                                                                                         | 92 |

## Methods

**Materials.** Sucrose ( $C_{12}H_{22}O_{11}$ , 99.9%), sodium bicarbonate ( $NaHCO_3$ , 99.8%), and chloroplatinic acid hexahydrate ( $H_2PtCl_6 \cdot 6H_2O$ , AR) were purchased from Shanghai Aladdin Bio-Chem Technology Co., Ltd. Phosphomolybdic acid hydrate ( $H_3P(Mo_3O_{10})_4 \cdot xH_2O$ ,  $\{PMo_{12}\}$  AR) and silicotungstic acid ( $SiO_2 \cdot 12WO_3 \cdot 26H_2O$ ,  $\{SiW_{12}\}$  AR) were purchased from Shanghai Macklin Biochemical Co., Ltd. Phosphotungstic acid hydrate ( $H_3O_{40}PW_{12} \cdot xH_2O$ ,  $\{PW_{12}\}$  99%) was obtained from Shanghai Titan Scientific Co., Ltd. Silicomolybdic acid solution ( $H_4SiO_4 \cdot 12MoO_3$ ,  $\{SiMo_{12}\}$  AR) and Nafion (5 wt.%) were from Sigma-Aldrich. Activated carbon was bought from Jiangsu Xianfeng Nanomaterials Technology Co., Ltd.

**Preparation of  $Pt_1@POMs@PC$ .**  $POMs@PC$  samples ( $PMo_{12}@PC$ ,  $PW_{12}@PC$ ,  $SiMo_{12}@PC$ , and  $SiW_{12}@PC$ ) were firstly synthesized via our reported method.<sup>1</sup> Then these  $POMs@PC$  (25 mg) samples were dispersed in 10 mL ultrapure water, followed by magnetic stirring for 20 min to obtain a homogeneous suspension. Secondly, 260  $\mu$ L of  $H_2PtCl_6 \cdot 6H_2O$  aqueous solution (20 mg/mL) was added slowly to achieve the equimolar coordination between Pt and POMs. After stirring the mixture for 16 h at 60 °C, the suspension was separated by centrifugation. The precipitates were washed with ultrapure water several times and then dried at 60 °C under vacuum overnight. The obtained samples were denoted as  $Pt_1@POMs@PC$  (viz.  $Pt_1@PMo_{12}@PC$ ,  $Pt_1@PW_{12}@PC$ ,  $Pt_1@SiMo_{12}@PC$ , and  $Pt_1@SiW_{12}@PC$ ). To ensure that each Pt is anchored in the nano-capturer, a series of  $Pt_x@POMs@PC$ , where  $x$  means mole ratios of Pt and POMs (0, 0.2, 0.4, 0.6, 0.8, 1, 1.2, 1.4) were also synthesized. As controls, pure PC and commercial activated carbon (AC)-supported POMs were also used to support Pt, expressed as  $Pt_1@PC$  and  $Pt-POMs/AC$ , respectively.

**Materials characterizations.** XRD patterns were collected on a Rigaku D/Max Ultima IV (Cu-K $\alpha$  radiation,  $\lambda = 1.5418 \text{ \AA}$ ) diffractometer with filtered. The morphology of the samples was characterized by HRTEM (JEM-2010, accelerating voltage of 200 kV), and high-angle annular dark-field scanning transmission electron microscopy (JEOL JEM-ARM200F STEM with a spherical aberration corrector, accelerating voltage of 200 kV). EDS data was collected by an X-MaxN100TLE detector. Ionic (Mo, W, and Pt) concentration was analyzed by inductively coupled plasma-optical emission spectroscopy (ICP-OES; Avio 200). UV-vis spectrum was conducted on a TU-1950 spectrophotometer. Nitrogen adsorption/desorption experiments were carried out on 77 K of Micromeritics ASAP 2020 equipment. The Brunauer–Emmett–Teller (BET) model was used for the specific surface area determination. Elemental electron binding energy was measured by X-ray photoelectron spectroscopy (XPS; ESCALAB 250XI). X-ray absorption fine structure (XAFS) including X-ray absorption near-edge structure (XANES) and extended X-ray absorption fine structure (EXAFS) of the  $Pt_1@PMo_{12}@PC$  and  $Pt_1@PC$  were collected at the SPring-8 14b2, where a pair of channel-cut Si (111) crystals was used in the monochromator (Note S4).

**Electrochemical measurements.** All electrochemical experiments were conducted on a CHI760E electrochemical workstation in a three-electrode system at room temperature. The catalyst ink was prepared by ultrasonically dispersing 2 mg of catalysts into 750  $\mu$ L of a mixture containing 550  $\mu$ L water, 180  $\mu$ L isopropanol, and 20  $\mu$ L Nafion for 2 h. Then, a glassy carbon electrode (GCE: diameter=3 mm) cast by catalyst ink (3.5  $\mu$ L), a graphite rod (diameter=5 mm), and a saturated calomel electrode (SCE) were used as the working electrode, counter electrode, and reference electrode, respectively. Note that Pt contents in  $Pt_1@POMs@PC$  series determined by ICP-OES are in the range of 2.1–3.8 wt.% (Table S12), which are close to XPS results (Table

**S13**). The calibration of SCE electrode was performed in a high-purity H<sub>2</sub>-saturated 0.5 M H<sub>2</sub>SO<sub>4</sub> with two Pt foils used as the working electrode and counter electrode, respectively, while the SCE was calibrated as the reference electrode. Cyclic voltammetry (CV) was conducted at a scan rate of 1 mV s<sup>-1</sup>, and the average of the two potentials at which the current crossed zero was taken as the thermodynamic potential for the hydrogen electrode reaction. As shown in **Fig. S68**, the CV result of RHE calibration in 0.5 M H<sub>2</sub>SO<sub>4</sub> can be described as  $E(\text{RHE}) = E(\text{SCE}) + 0.2636 \text{ V}$ . Linear sweep voltammetry was recorded at 5 mV s<sup>-1</sup> in Ar-saturated 0.5 M H<sub>2</sub>SO<sub>4</sub>. Tafel slopes were determined by plotting the overpotential vs. the logarithm of current density ( $\log |j|$ ). EIS measurements were conducted in the frequency range from 10<sup>5</sup> Hz to 10<sup>-2</sup> Hz with an amplitude of 5 mV at various HER overpotentials. The stability tests for the Pt<sub>1</sub>@POMs@PC, Pt-POMs/AC, and Pt<sub>1</sub>@C were conducted using chronopotentiometry at a current density of 10 mA cm<sup>-2</sup>. The mass activity and TOF information can be found in **Note S5**. H/D kinetic isotope effects (KIEs) experiment and pH-dependence measurement were also conducted to verify the occurrence of H-spillover.

***In situ Raman spectroscopy measurements.*** In-situ Raman spectra were collected in a confocal Raman microscopic spectrometer (Renishaw, inVia Qontorin) with an excitation of 532 nm laser while electrochemical curves were collected using a CHI 760E electrochemical workstation in 0.5 M H<sub>2</sub>SO<sub>4</sub>. The catalyst ink was dropped on a 3×3 mm hydrophobic carbon paper, followed by drying at 25 °C. In the in-situ Raman test, the carbon rod is used as a counter electrode, and the reference electrode is an Ag/AgCl electrode. Chronoamperometry was performed at various potentials in 0.5 M H<sub>2</sub>SO<sub>4</sub> during the Raman measurement.

#### ***Computational Details***

***Extended Tight-binding (xTB) calculations.*** All extended tight-binding calculations were done by xTB 6.4.0 package.<sup>2</sup> Geometry Frequency Noncovalent 0 (GFNO)-xTB level of parametrization was adapted for geometry optimization<sup>3</sup>. To simulate the nano-porous graphite, 4 layers of graphite were constructed on the z-direction. The hexagonal graphite cell was redefined to be an orthogonal cell. A 9 × 16 supercell was used, which has a dimension of 30 Å on the x-direction and 32 Å on the y-direction. The model was cleaved out to be non-periodic and the dangling bonds on the edge of graphite were passivated by hydrogen atoms. A 12.6 Å nano-pore was constructed by creating a semi-sphere vacancy on the graphite surface as suggested by previously reported works.<sup>1, 4, 5</sup> Vacancies are created only on the first three carbon layers as the radius of the semi-sphere does not exceed 8 Å, which indicates that the 4<sup>th</sup> layer remains at the bottom of the sphere. The size of the nano-pore is referred to as the diameter of the pore on the first layer. The binding energy ( $E_b$ ) of Pt in Pt<sub>1</sub>@POMs@G is defined as:

$$E_b = E(\text{Pt}_1\text{@POMs@G}) - E(\text{POMs@G}) - E(\text{Pt})$$

where  $E(\text{Pt}_1\text{@POMs@G})$  is the total energy of the Pt loaded on the POMs@G substrate,  $E(\text{POMs@G})$  is the total energy of the isolated POMs@G substrate, and  $E(\text{Pt})$  is the total energy of isolated Pt atom. Therefore, a more negative  $E_b$  corresponds to a more favored adsorption.  $E_b$  for other models can be seen in **Note S6**.

To investigate whether Pt will agglomerate or not, we have carried out theoretical calculations on thermodynamic processes. The cohesive energies per Pt atom ( $E_{\text{coh-Pt}}$ ) from thermodynamics are evaluated as:

$$E_{\text{coh-Pt}} = (E_{\text{cluster}} - N \times E_{\text{atom}}) / N$$

where  $E_{\text{cluster}}$  is the energy of a Pt cluster consisting of a certain number ( $N$ ) of Pt atoms,  $E_{\text{atom}}$  is the energy of a single Pt atom in a vacuum, and  $E_{\text{coh-Pt}}$  refers to the energy gained when isolated single atoms are assembled into clusters. A more negative  $E_{\text{coh-Pt}}$  indicates a more stable Pt cluster. To model the Pt cluster or nanoparticle, Wulff construction was employed to minimize the total surface energy of Pt, as reported by Tran et al<sup>6</sup>

All involved structures are isolated and non-periodic to avoid the periodic Coulombic interaction for charged systems (i.e., charged slabs). The charge density difference of  $\text{Pt}_1\text{@POMs@G}$  ( $\Delta\rho$ ) is defined as:

$$\Delta\rho = \rho(\text{Pt}_1\text{@POMs@G}) - \rho(\text{POMs@G}) - \rho(\text{Pt})$$

where  $\rho(\text{Pt}_1\text{@POMs@G})$  is the electron density of the Pt loaded on the POMs@G substrate,  $\rho(\text{POMs@G})$  is the electron density of the isolated POMs@G substrate, and  $\rho(\text{Pt})$  is the electron density of the isolated Pt atom. Thus, a positive  $\Delta\rho$  indicates obtaining electrons and a negative  $\Delta\rho$  indicates losing electrons. The charge density difference and Hirshfeld population analysis were done by using *Multiwfn* software.<sup>7</sup>  $\Delta\rho$  for other models can be seen in **Note S7**.

The H adsorption-free energy ( $G_{\text{ads}}$ ) is defined as:

$$\Delta G_{\text{ads}} = G[\text{H} + \text{surf}] - G[\text{surf}] - \frac{1}{2}G[\text{H}_2]$$

where  $G[\text{H} + \text{surf}]$  is the free energy of the H absorbed surface,  $G[\text{surf}]$  is the free energy of the surface, and  $G[\text{H}_2]$  is the free energy of the surface. The free energy change of the surface before and after adsorption is neglected:

$$\Delta G_{\text{ads}} = (E[\text{H}_{\text{abs}} + \text{surf}] + \text{ZPE}[\text{H}_{\text{abs}}] - T\text{S}[\text{H}_{\text{abs}}]) - E[\text{surf}] - \frac{1}{2}(E[\text{H}_2] + \text{ZPE}[\text{H}_2] - T\text{S}[\text{H}_2])$$

$$\Delta G_{\text{ads}} = \Delta E + \Delta \text{ZPE} - T\Delta S$$

where  $E$  is the electronic energy,  $\text{ZPE}$  is the zero point energy, and  $S$  is the entropy.  $\text{H}_{\text{abs}}$  refers to the absorbed H. The electronic energy change ( $\Delta E$ ) is:

$$\Delta E = E[\text{H} + \text{surf}] - E[\text{surf}] - \frac{1}{2}E[\text{H}_2]$$

The entropy change ( $\Delta S$ ) is:

$$\Delta S = S[\text{H}_{\text{absorb}}] - \frac{1}{2}S[\text{H}_2]$$

The ZPE change ( $\Delta \text{ZPE}$ ) is:

$$\Delta \text{ZPE} = \text{ZPE}[\text{H}_{\text{abs}}] - \frac{1}{2}\text{ZPE}[\text{H}_2]$$

The estimated contribution from  $\Delta \text{ZPE}$  and  $T\Delta S$  at 298 K is approximated to be 0.24 eV<sup>8</sup>, which gives that:

$$\Delta G_{\text{ads}} = \Delta E + 0.24 \text{ eV}$$

**Molecular dynamics (MD) simulation.** molecular dynamics (MD) studies have been conducted to verify the kinetic stabilities of the absorbed Pt single atoms. Note that the Geometry Frequency Noncovalent force field (GFN-FF)<sup>9</sup> was adopted. Meanwhile, the canonical ensemble (NVT) was used with a targeted temperature of 298.15K after 50 ps (the time step for propagation is 1 fs) for  $\text{Pt}_1\text{@PMO}_{12}\text{@G-01}$ ,  $\text{Pt}_1\text{@PW}_{12}\text{@G-01}$ ,  $\text{Pt}_1\text{@SiMO}_{12}\text{@G-01}$ , and  $\text{Pt}_1\text{@SiW}_{12}\text{@G-01}$ .

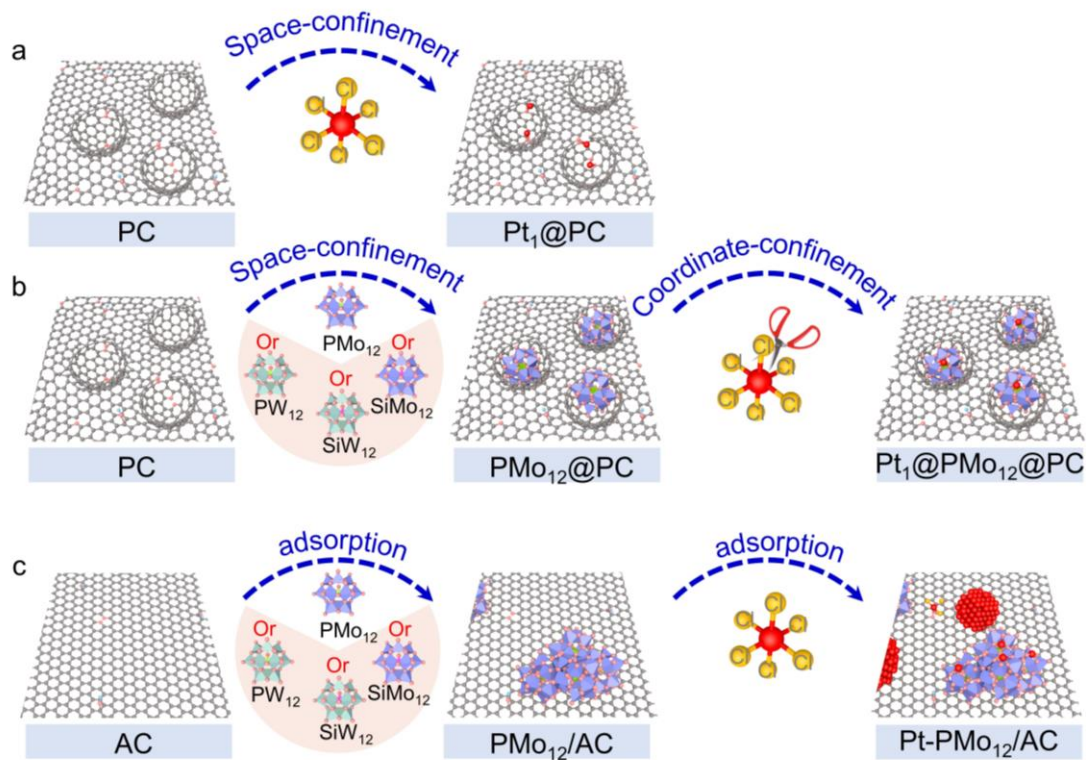

**Fig. S1.** Schematic illustration of the preparation process for (a) Pt<sub>1</sub>@PC, (b) Pt<sub>1</sub>@POMs@PC, and (c) Pt-POMs/AC.

Note that we take PMo<sub>12</sub> here as an example to illustrate the preparation process.

Pt was confined in the PC support by wet impregnation. The exceptional affinity of PC for Pt can be attributed to its oxygen-enriched hydroxyl, and carboxyl groups on the surface inherited from precursor. We found that when commercial AC was used as the substrate, Pt nanoparticles were generated, which is due to lower binding energies between the Pt atom and POMs/AC, as confirmed by calculations. Because unconfined POMs are also at risk of agglomeration.

Note that both pure Pt precursors and POMs can be dispersed in the liquid-phase systems. Owing to the limited coordination sites on the POMs surface, when the unsaturated sites of POMs are completely occupied by single Pt atoms, an excess of Pt precursors is prone to agglomerate into NPs until the surface is stabilized by POMs. Even though reducing the input of metal precursors, the generation of NPs can hardly be completely inhibited due to the spatially inhomogeneous dispersion caused by the high mobility of metal precursors. Hence, to avoid their aggregation, it is necessary to restrict the spatial dispersion and mobility of POMs before mixing with Pt precursors.<sup>10</sup>



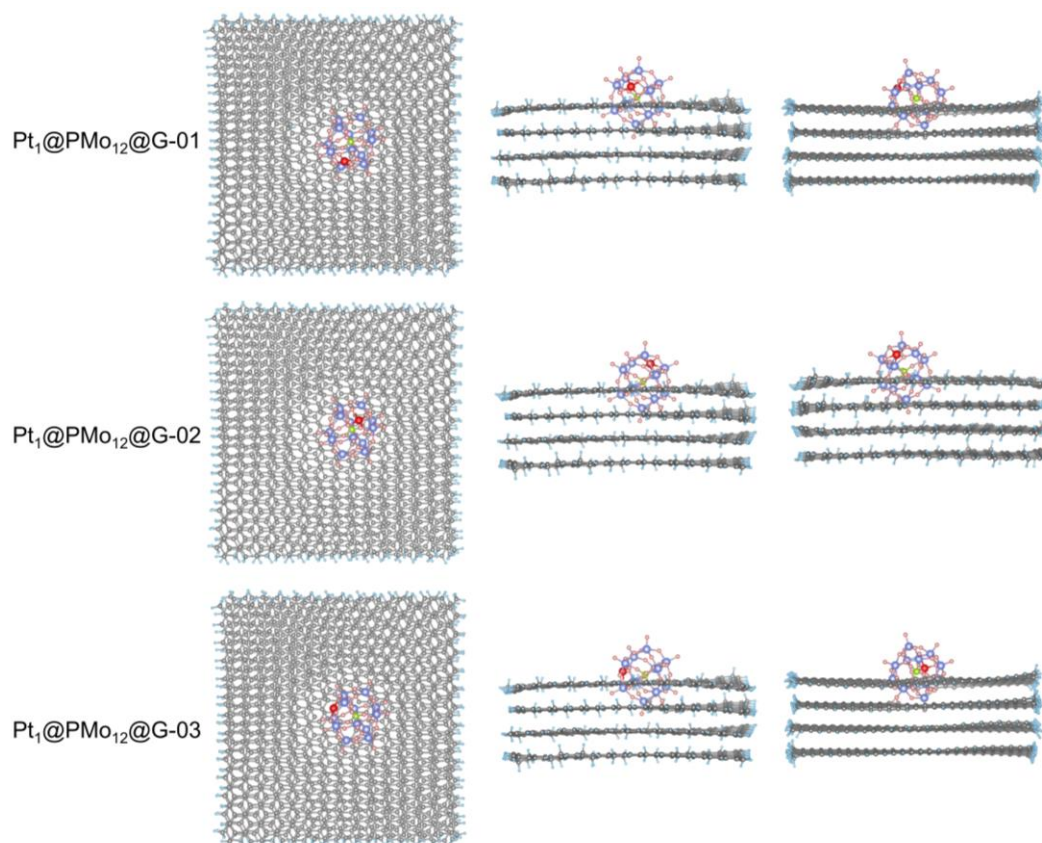

**Fig. S2.** Optimized structural models showing the top view, front view, and side view of Pt<sub>1</sub>@PMo<sub>12</sub>@G-01, Pt<sub>1</sub>@PMo<sub>12</sub>@G-02, and Pt<sub>1</sub>@PMo<sub>12</sub>@G-03 with the Pt atom anchored on the O4H site.

Note that there are three O4H sites exposed on the surface of confined POMs. POMs@G-01, POMs@G-02, and POMs@G-03 refer to different O4H site models.



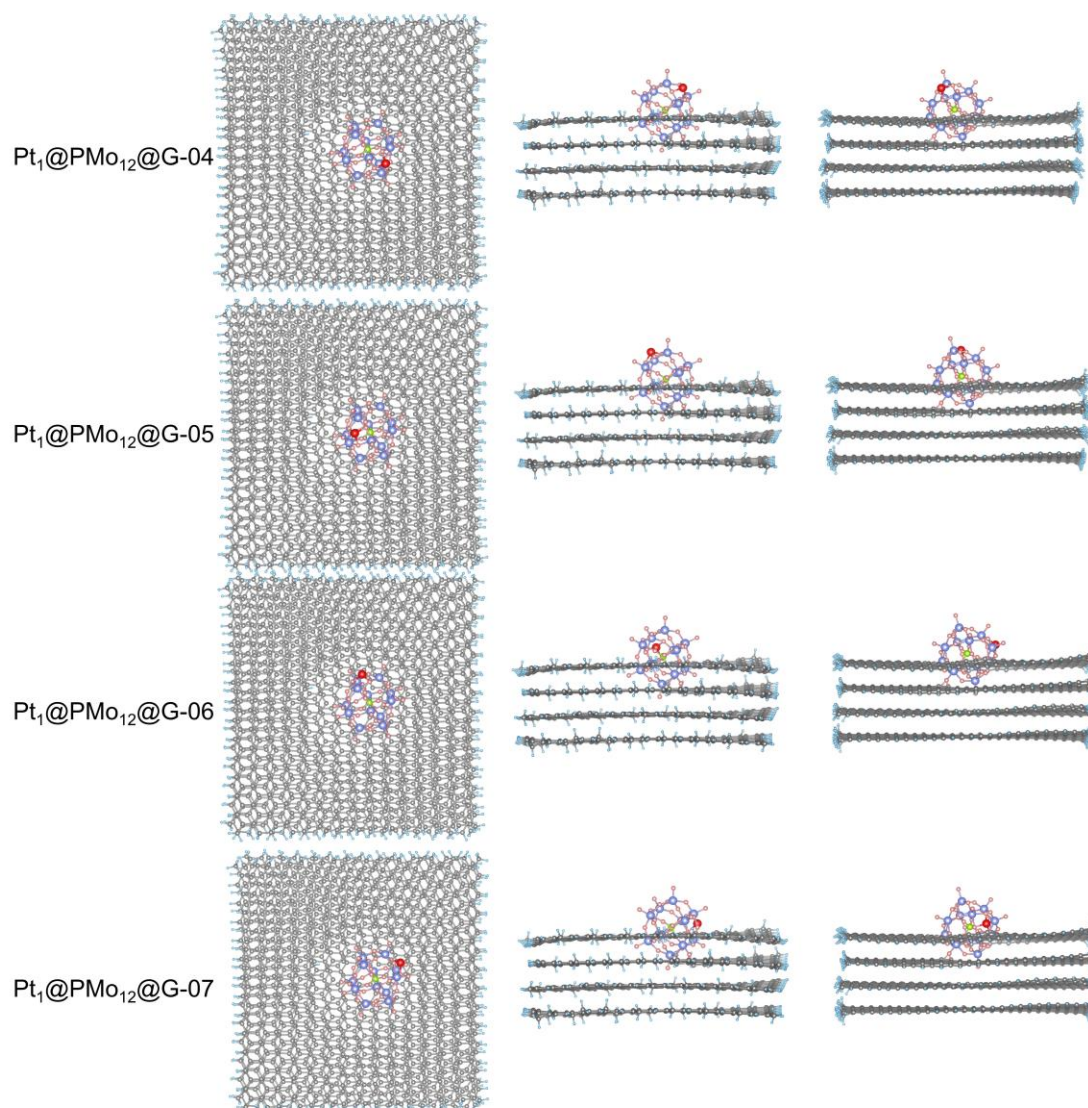

**Fig. S3.** Optimized structural models showing the top view, front view, and side view of  $\text{Pt}_1@PMo_{12}@G-04$ ,  $\text{Pt}_1@PMo_{12}@G-05$ ,  $\text{Pt}_1@PMo_{12}@G-06$ , and  $\text{Pt}_1@PMo_{12}@G-07$  with the Pt atom anchored on the O3H site.

Note that there are four O3H sites exposed on the surface of confined POMs. POMs@G-04, POMs@G-05, POMs@G-06, and POMs@G-07 refer to different O3H site models.

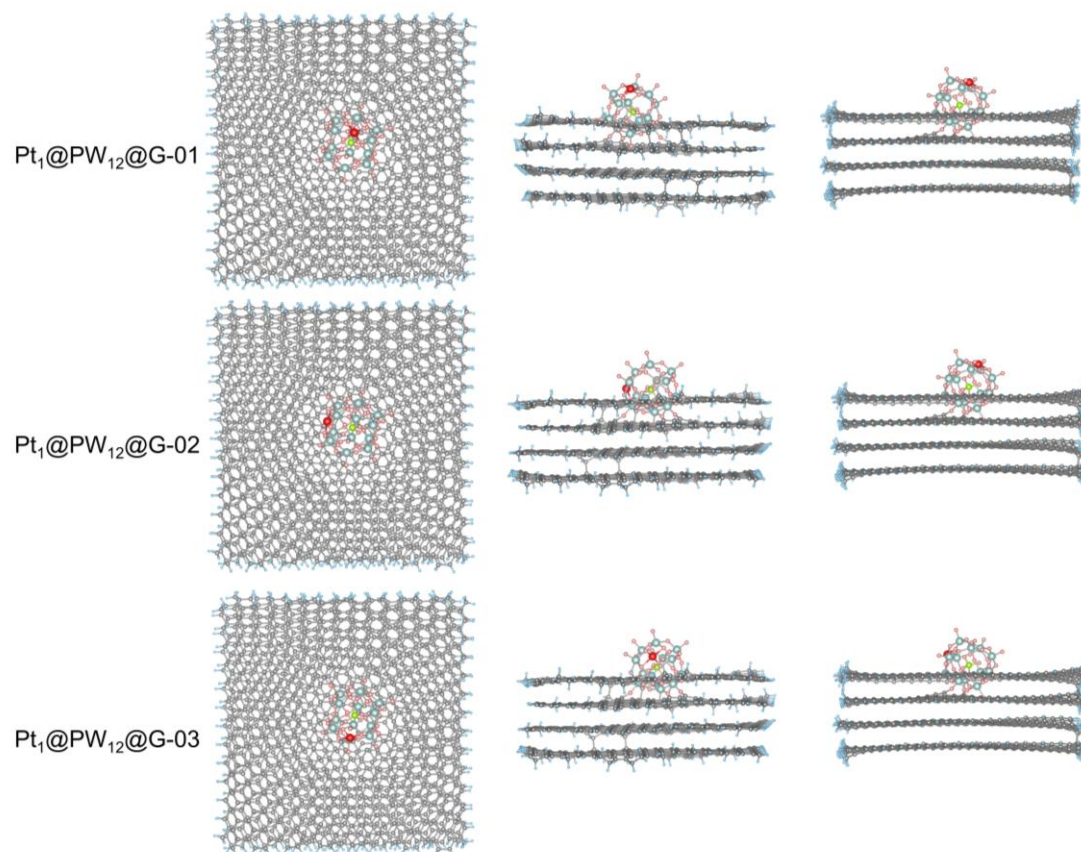

**Fig. S4.** Optimized structural models showing the top view, front view, and side view of Pt<sub>1</sub>@PW<sub>12</sub>@G-01, Pt<sub>1</sub>@PW<sub>12</sub>@G-02, and Pt<sub>1</sub>@PW<sub>12</sub>@G-03 with the Pt atom anchored at the O4H site.

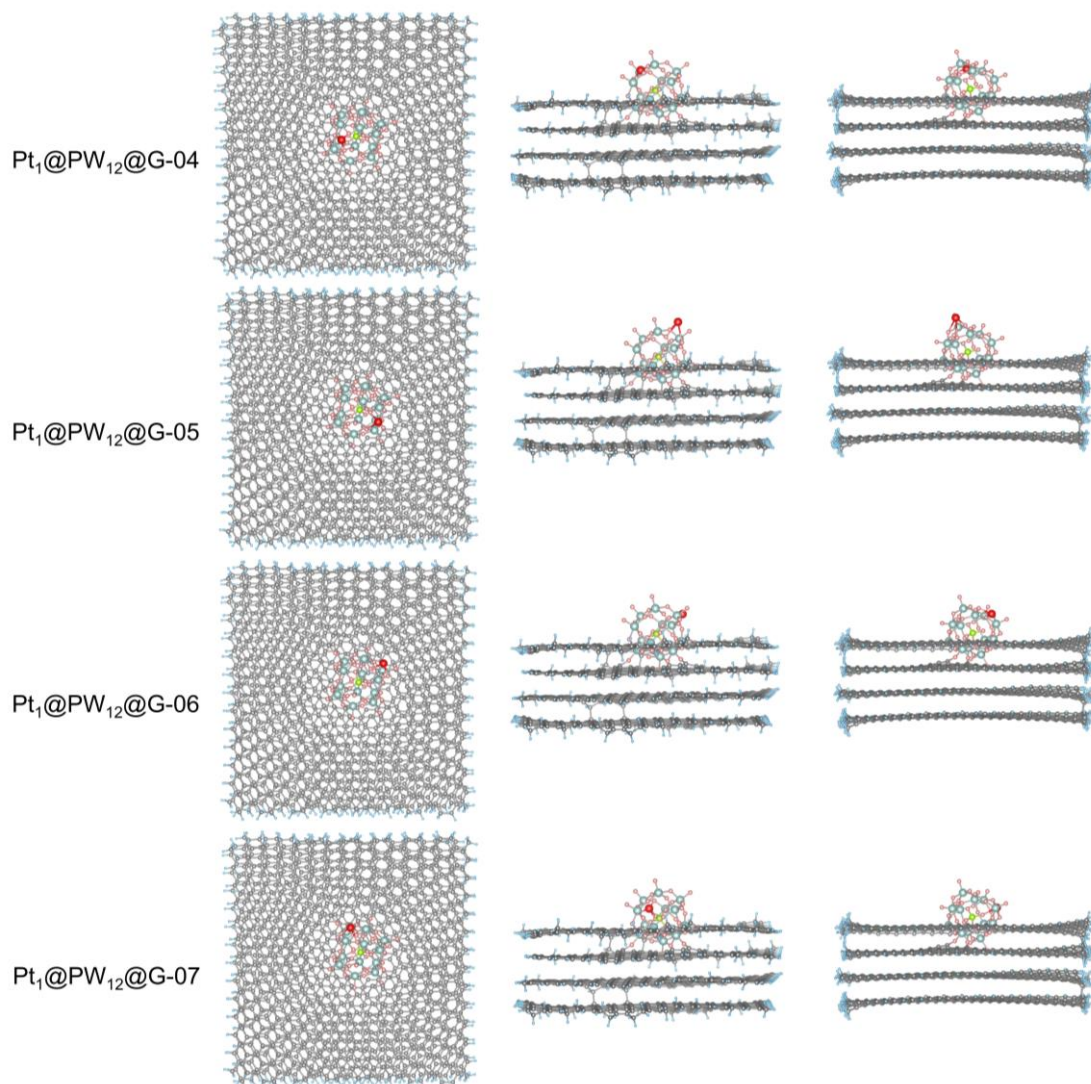

**Fig. S5.** Optimized structural models showing the top view, front view, and side view of Pt<sub>1</sub>@PW<sub>12</sub>@G-04, Pt<sub>1</sub>@PW<sub>12</sub>@G-05, Pt<sub>1</sub>@PW<sub>12</sub>@G-06, and Pt<sub>1</sub>@PW<sub>12</sub>@G-07 with the Pt atom anchored at the O3H site.



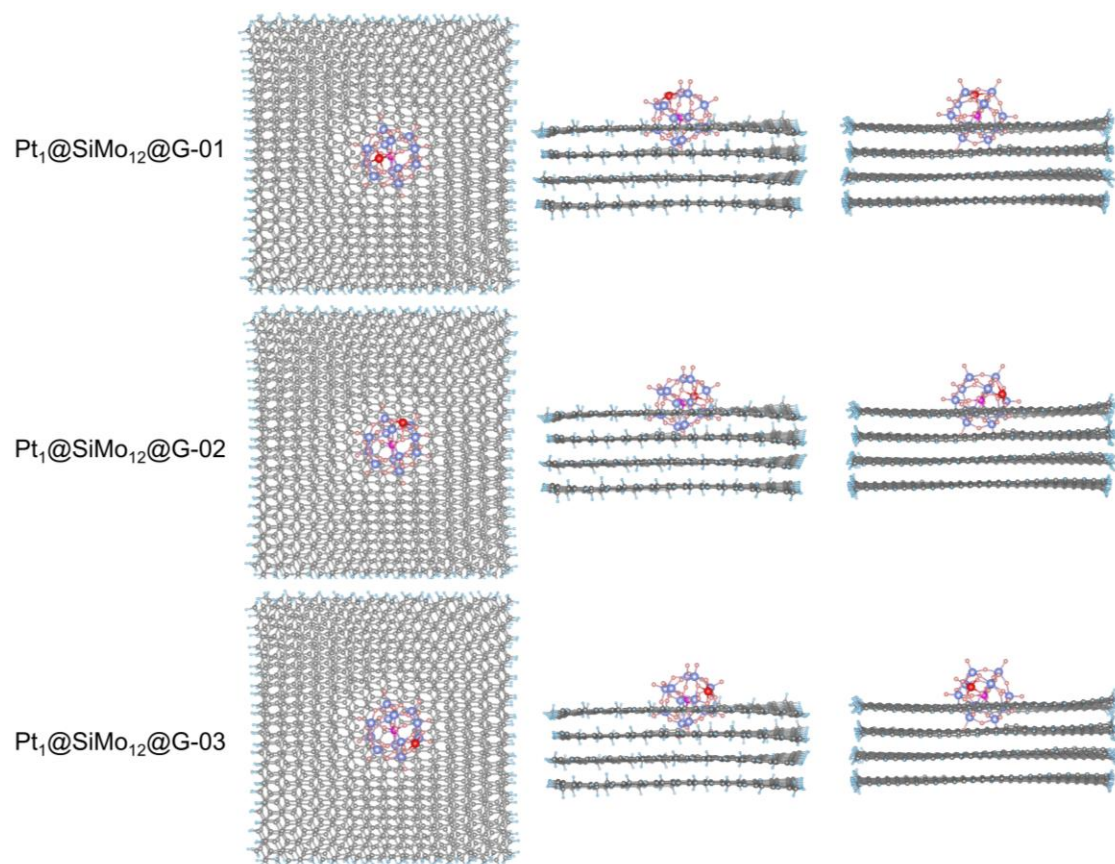

**Fig. S6.** Optimized structural models showing the top view, front view, and side view of  $\text{Pt}_1@\text{SiMo}_{12}@G-01$ ,  $\text{Pt}_1@\text{SiMo}_{12}@G-02$ , and  $\text{Pt}_1@\text{SiMo}_{12}@G-03$  with the Pt atom anchored at the O4H site.

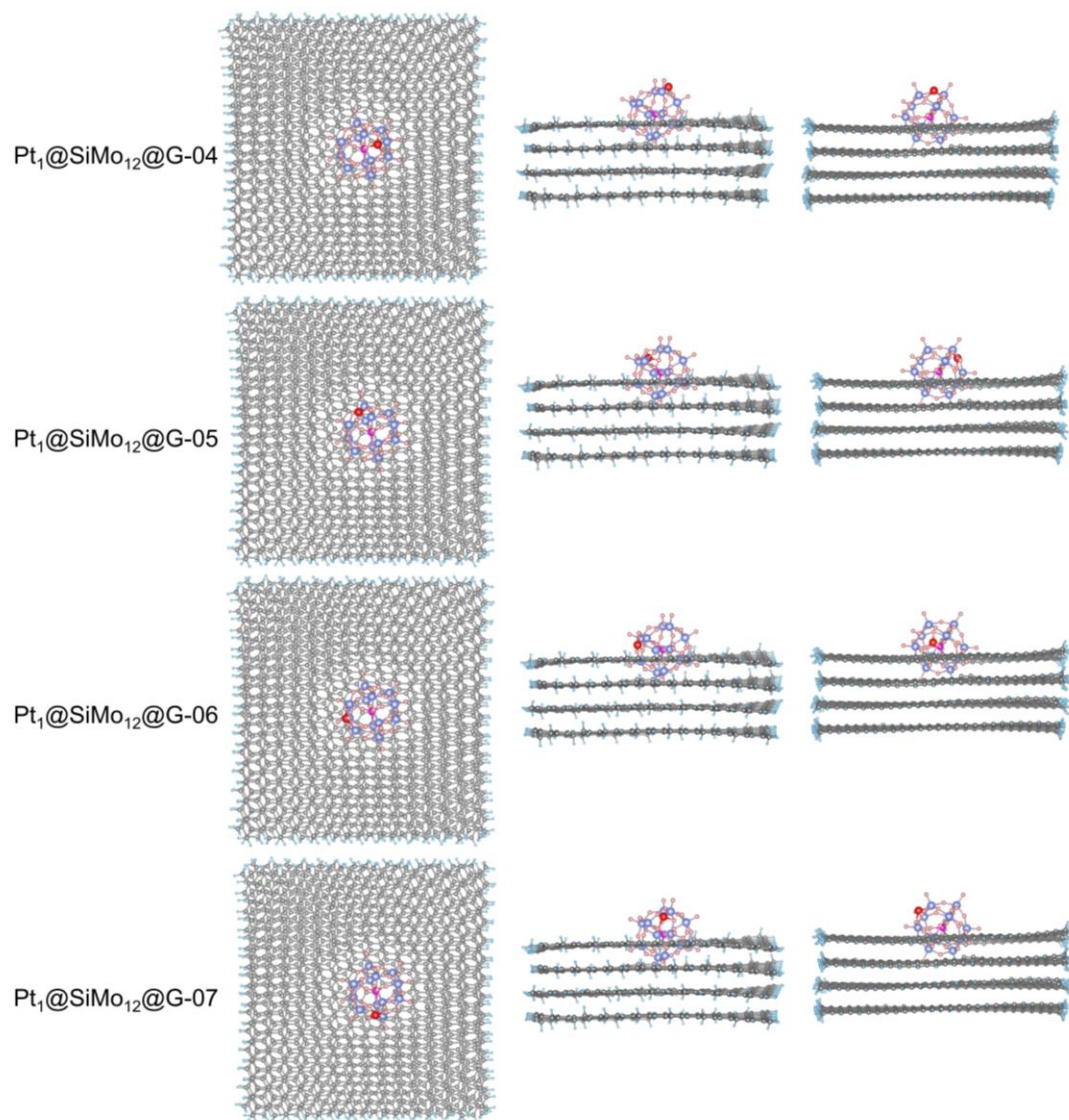

**Fig. S7.** Optimized structural models showing the top view, front view, and side view of Pt<sub>1</sub>@SiMo<sub>12</sub>@G-04, Pt<sub>1</sub>@SiMo<sub>12</sub>@G-05, Pt<sub>1</sub>@SiMo<sub>12</sub>@G-06, and Pt<sub>1</sub>@SiMo<sub>12</sub>@G-07 with the Pt atom anchored at the O3H site.

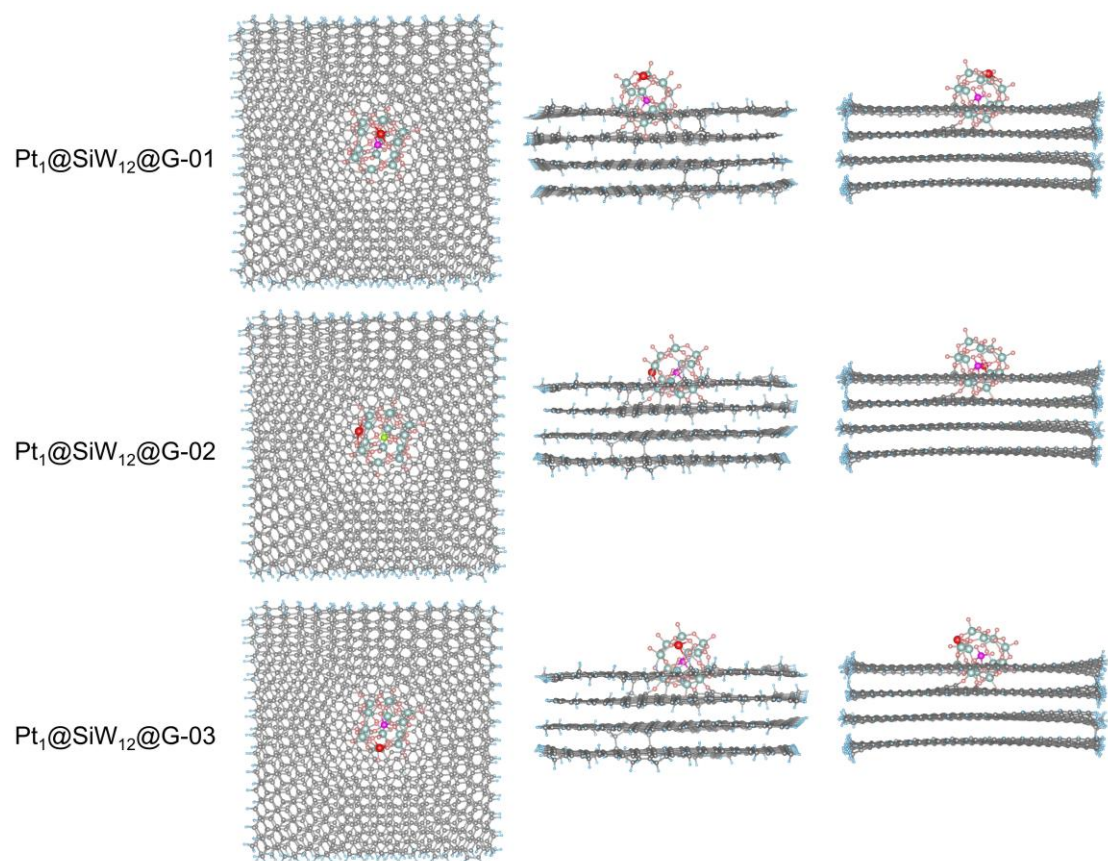

**Fig. S8.** Optimized structural models showing the top view, front view, and side view of Pt<sub>1</sub>@SiW<sub>12</sub>@G-01, Pt<sub>1</sub>@SiW<sub>12</sub>@G-02, and Pt<sub>1</sub>@SiW<sub>12</sub>@G-03 with the Pt atom anchored at the O4H site.

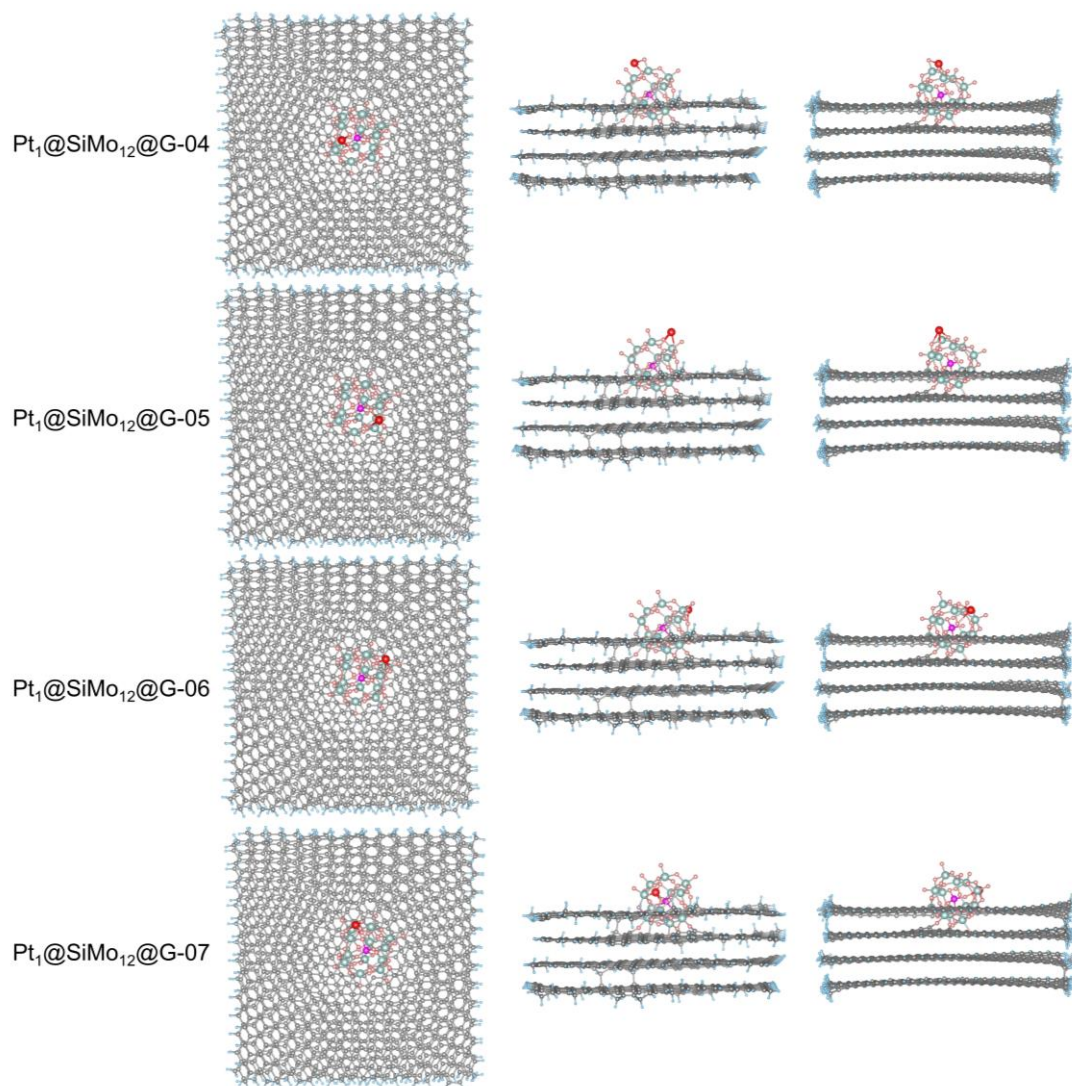

**Fig. S9.** Optimized structural models showing the top view, front view, and side view of  $\text{Pt}_1@SiW_{12}@G-04$ ,  $\text{Pt}_1@SiW_{12}@G-05$ ,  $\text{Pt}_1@SiW_{12}@G-06$ , and  $\text{Pt}_1@SiW_{12}@G-07$  with the Pt atom anchored at the O3H site.



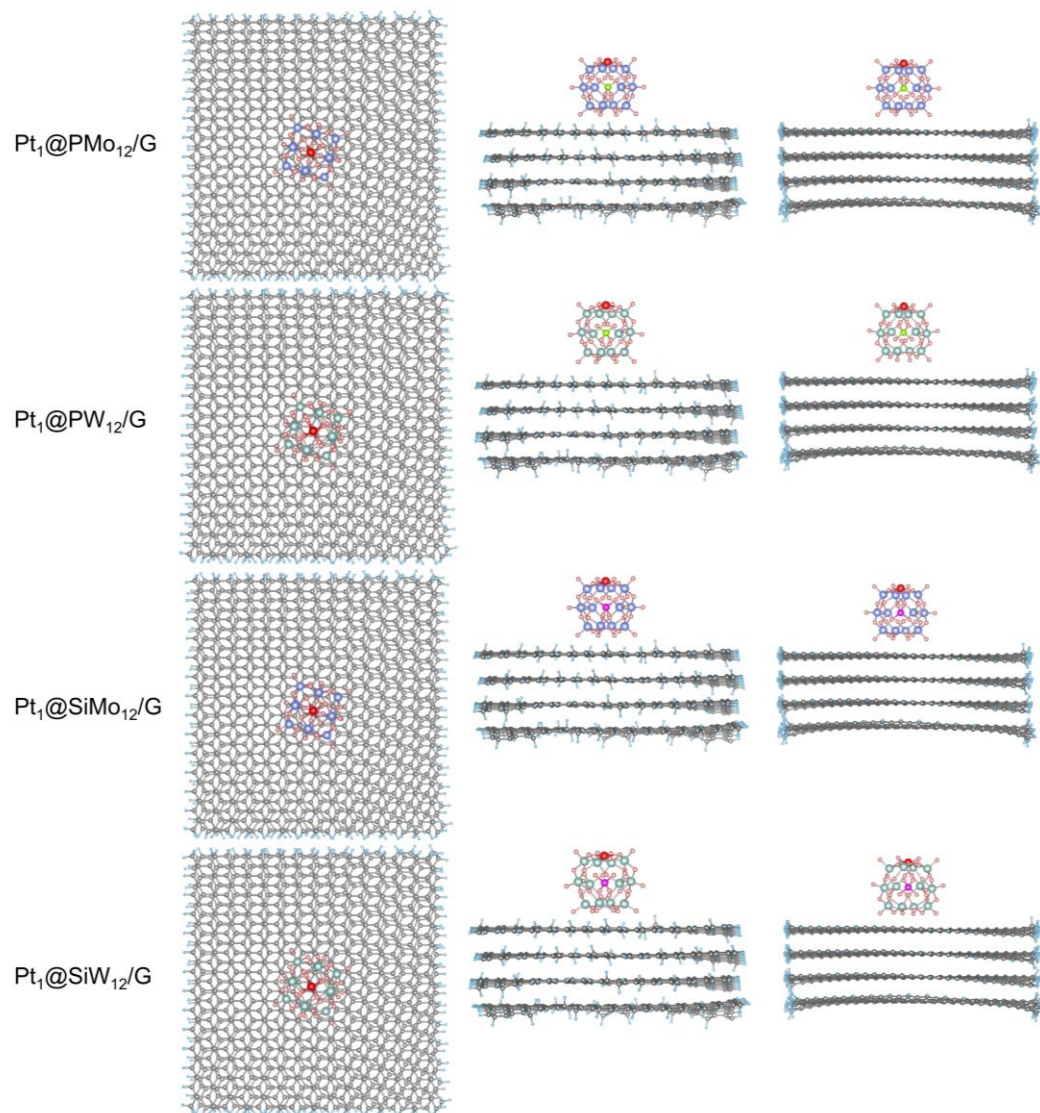

**Fig. S10.** Optimized structural models showing the top view, front view, and side view of non-confined systems ( $\text{Pt}_1@PMo_{12}/G$ ,  $\text{Pt}_1@PW_{12}/G$ ,  $\text{Pt}_1@SiMo_{12}/G$ , and  $\text{Pt}_1@SiW_{12}/G$ ), with the Pt atom anchored at the O4H site.

Considering that the binding of Pt at the 4H site of POMs in the dual-confined system is more stable, we performed computational modeling on the unconfined system with Pt atoms at the 4H site of POMs/G as a control.



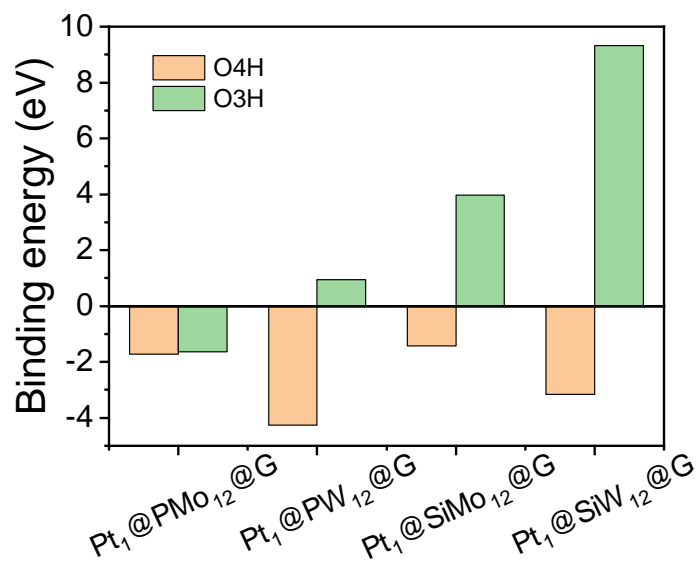

**Fig. S11.** Binding energies of Pt on O4H or O3H sites exposed on the surface of Pt<sub>1</sub>@POMs@G. There are three exposed O4H sites and four O3H sites in the dual-confinement system. So, the binding energy here is an average value.

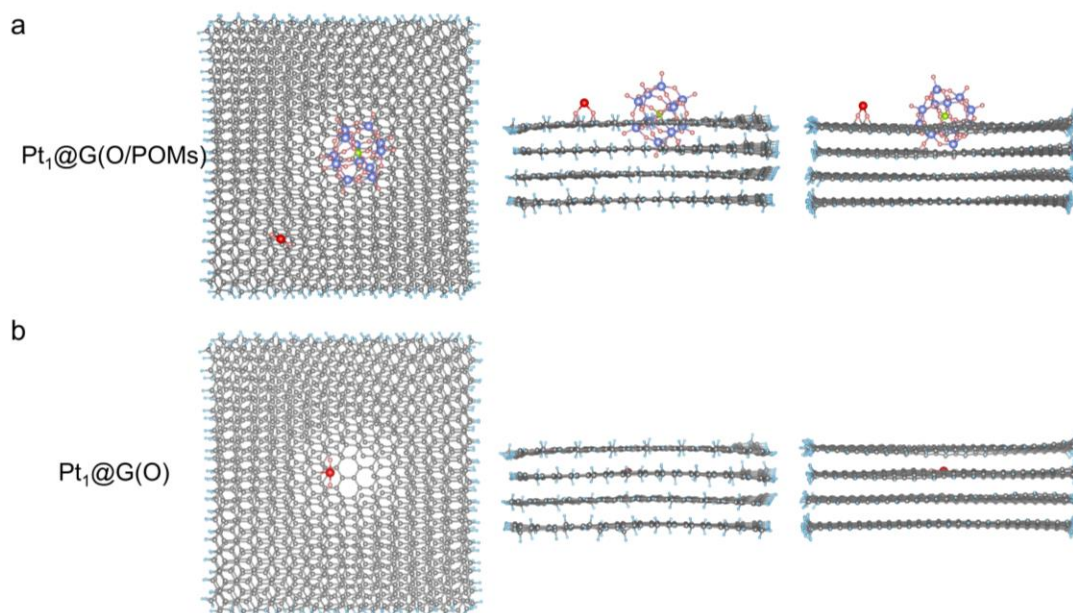

**Fig. S12.** Optimized structural models showing the top view, front view, and side view of (a) Pt<sub>1</sub>@G(O/POMs) and (b) Pt<sub>1</sub>@G(O).

G(O/POMs) represent the PC support containing (confining) POMs. G(O) is the model for PC-containing O, and G is the model for bare PC.

Take PMo<sub>12</sub> as a prototype, according to the xTB results, the configuration for Pt<sub>1</sub>@G(O/POMs) and Pt<sub>1</sub>@G(O) can be predicted as in **Fig. S12**.

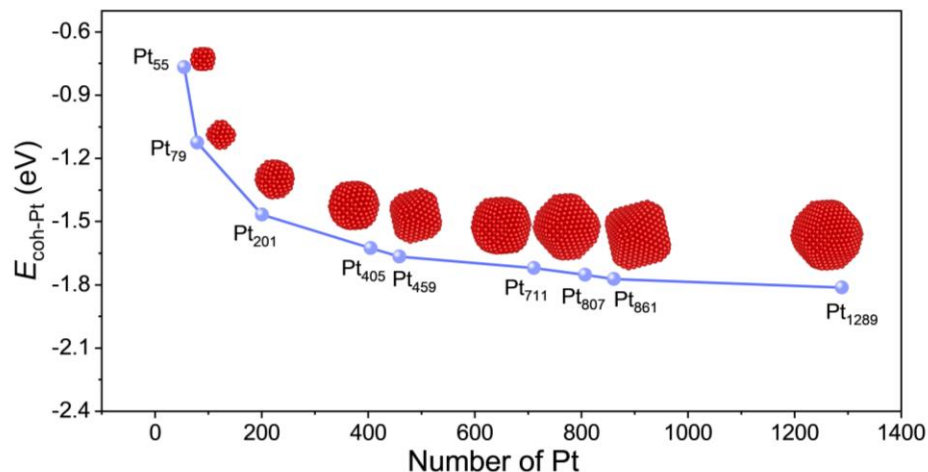

**Fig. S13.** The cohesive energies per Pt atom ( $E_{\text{coh-Pt}}$ ) for small Pt clusters or large Pt nanoparticles.

If the interaction between Pt and supports is stronger than the cohesive energy of Pt atoms, Pt atoms can generally stay atomically at confined POMs. In contrast, if the binding energy drops below the cohesive energy value of Pt atoms, Pt atoms will agglomerate<sup>11</sup>. The general process of crystal formation involves the formation of crystal nuclei, followed by gradual growth. In **Fig. S13**, the results show that  $E_{\text{coh-Pt}}$  is -0.77 eV for a smaller cluster (viz. Pt<sub>55</sub>) in the early growth stage. In comparison, the binding energy between a Pt atom and PW<sub>12</sub>@G is -2.6 eV, which is more negative than  $E_{\text{coh-Pt}}$  for Pt<sub>55</sub> (**Fig. 1b**). This indicates that in the Pt<sub>1</sub>@PW<sub>12</sub>@PC, a single Pt atom is more inclined to be absorbed on PW<sub>12</sub>@G rather than aggregating into Pt clusters. Although the  $E_{\text{coh-Pt}}$  converges to -1.81 eV for a larger nanoparticle (viz. Pt<sub>1289</sub>), the assembly of absorbed Pt single atom into the Pt cluster is inhibited at its early stage. Similarly, Pt<sub>1</sub>@PMo<sub>12</sub>@G, Pt<sub>1</sub>@SiMo<sub>12</sub>@G, and Pt<sub>1</sub>@SiW<sub>12</sub>@G, also show more negative binding energies toward Pt atoms (-1.46 eV, -1.30 eV, and -1.47 eV, respectively). Therefore, the Pt atoms tend to be stably loaded on the confined POMs in the Pt<sub>1</sub>@POMs@G system rather than self-agglomerate.

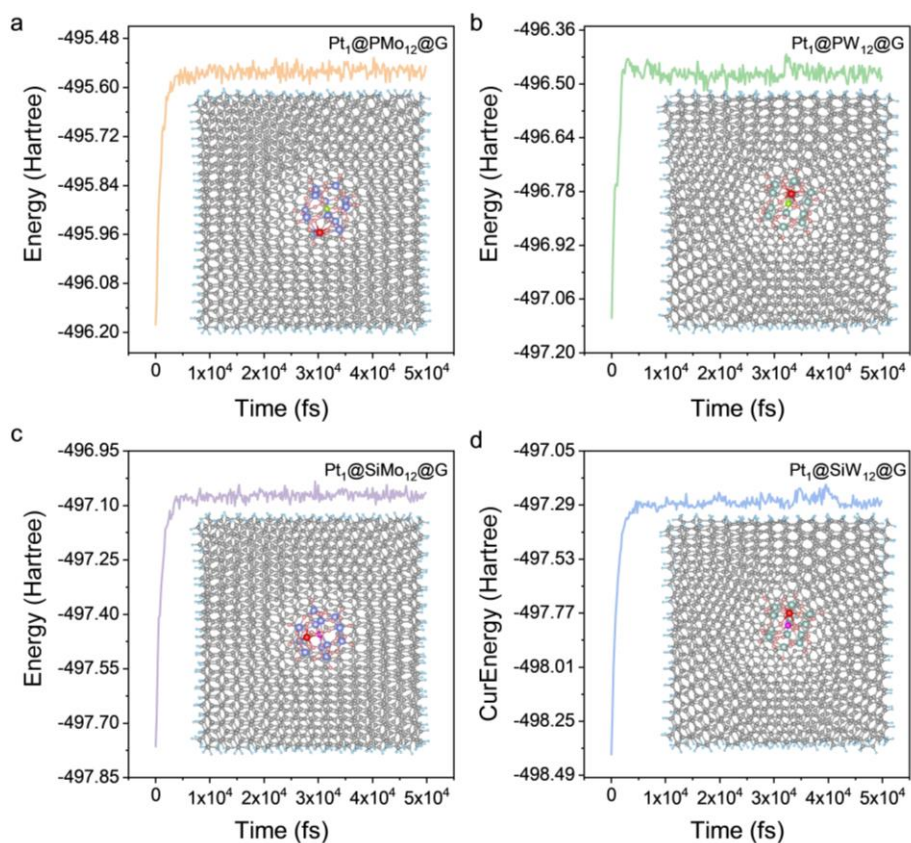

**Fig. S14.** MD simulation. Total energies of (a)  $\text{Pt}_1@PMo_{12}@G$ , (b)  $\text{Pt}_1@PW_{12}@G$ , (c)  $\text{Pt}_1@SiMo_{12}@G$ , and (d)  $\text{Pt}_1@SiW_{12}@G$  in 50 ps. Inset: last frame structure of  $\text{Pt}_1@PMo_{12}@G$  in (a),  $\text{Pt}_1@PW_{12}@G$  in (b),  $\text{Pt}_1@SiMo_{12}@G$  in (c), and  $\text{Pt}_1@SiW_{12}@G-01$  in (d) after 50 ps MD simulation.

**Fig. S14** shows the total energy and final frame of  $\text{Pt}_1@PMo_{12}@G$ ,  $\text{Pt}_1@PW_{12}@G$ ,  $\text{Pt}_1@SiMo_{12}@G$ , and  $\text{Pt}_1@SiW_{12}@G$ . No significant reconstruction is observed when all systems have reached equilibrium at 298.15 K, suggesting that the absorbed Pt single atom is kinetically stable at room temperature.

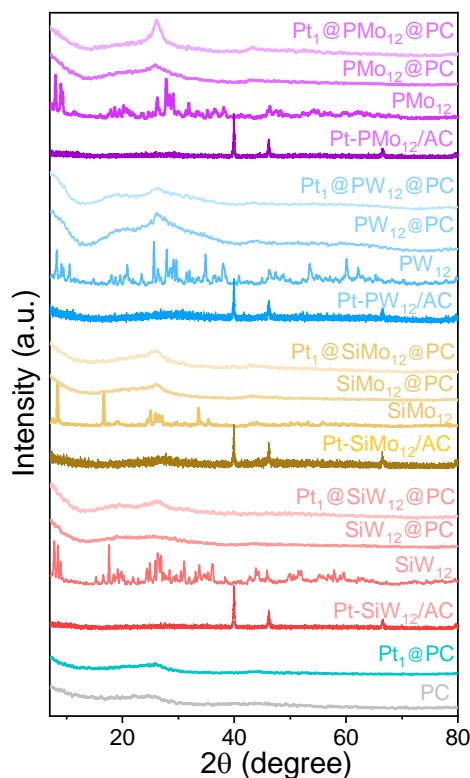

**Fig. S15.** XRD patterns of PC, Pt<sub>1</sub>@PC, POMs (viz. PW<sub>12</sub>, PMo<sub>12</sub>, SiW<sub>12</sub>, SiMo<sub>12</sub>), POMs@PC (viz. PW<sub>12</sub>@PC, PMo<sub>12</sub>@PC, SiW<sub>12</sub>@PC, SiMo<sub>12</sub>@PC), Pt<sub>1</sub>@POMs@PC (viz. Pt<sub>1</sub>@PW<sub>12</sub>@PC, Pt<sub>1</sub>@PMo<sub>12</sub>@PC, Pt<sub>1</sub>@SiW<sub>12</sub>@PC, Pt<sub>1</sub>@SiMo<sub>12</sub>@PC), and Pt@POMs/AC (viz. Pt@PW<sub>12</sub>/AC, Pt<sub>1</sub>@PMo<sub>12</sub>/AC, Pt@SiW<sub>12</sub>/AC, Pt@SiMo<sub>12</sub>/AC).

PC, POMs@PC, and Pt<sub>1</sub>@POMs@PC show only similar major reflections with the amorphous phase of graphite at ~ 26° and 44°<sup>12</sup> but no characteristic reflections of Pt NPs and POMs are found.<sup>13</sup> While in the XRD pattern of Pt-POMs/AC, three strong and sharp diffraction peaks at 40°, 47°, and 68° are observed, corresponding to the respective (111), (200), and (220) crystal phases of Pt NPs.

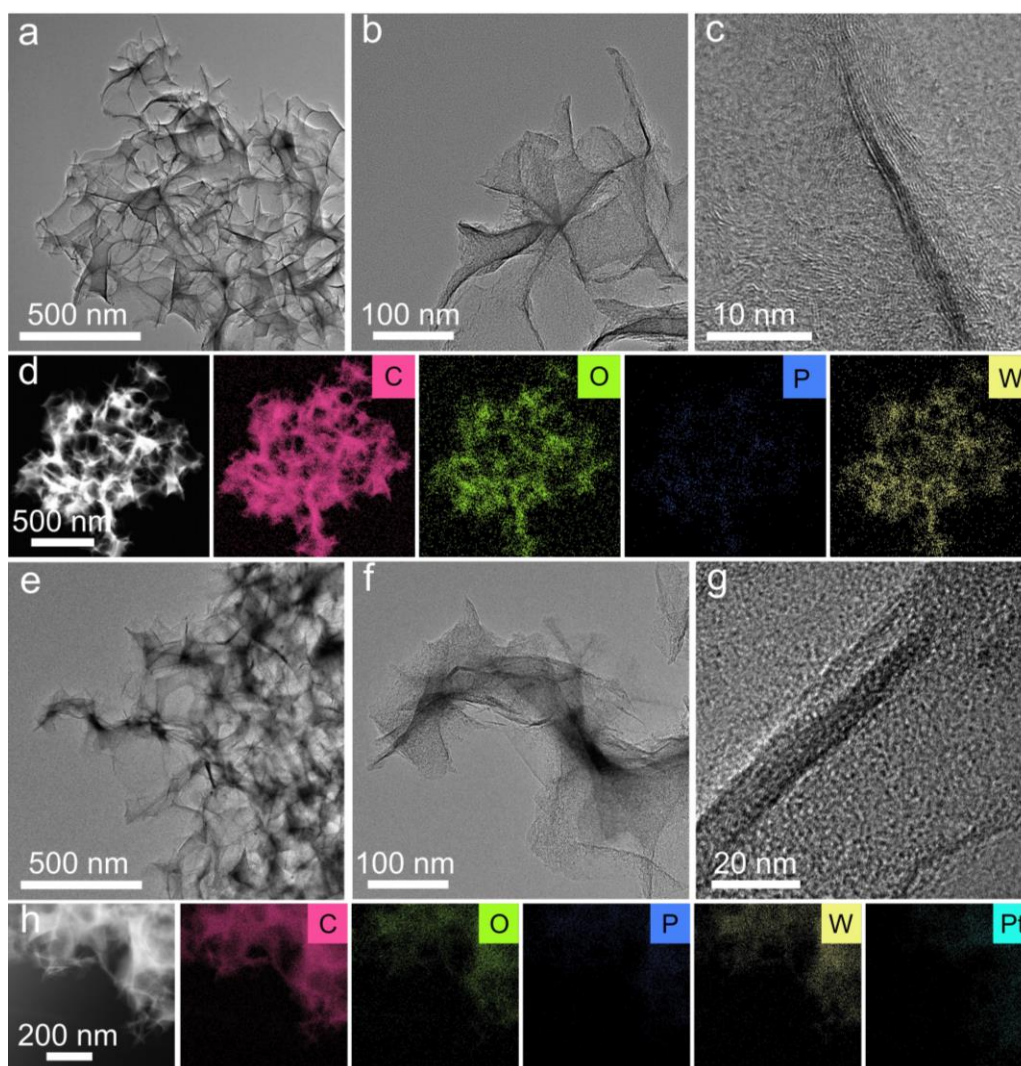

**Fig. S16.** (a–d) TEM images of  $PW_{12}@PC$  and corresponding EDS mapping images of C, O, P, and W elements. (e–h) TEM images of  $Pt_1@PW_{12}@PC$  and the corresponding EDS mapping images of C, O, P, W, and Pt elements.



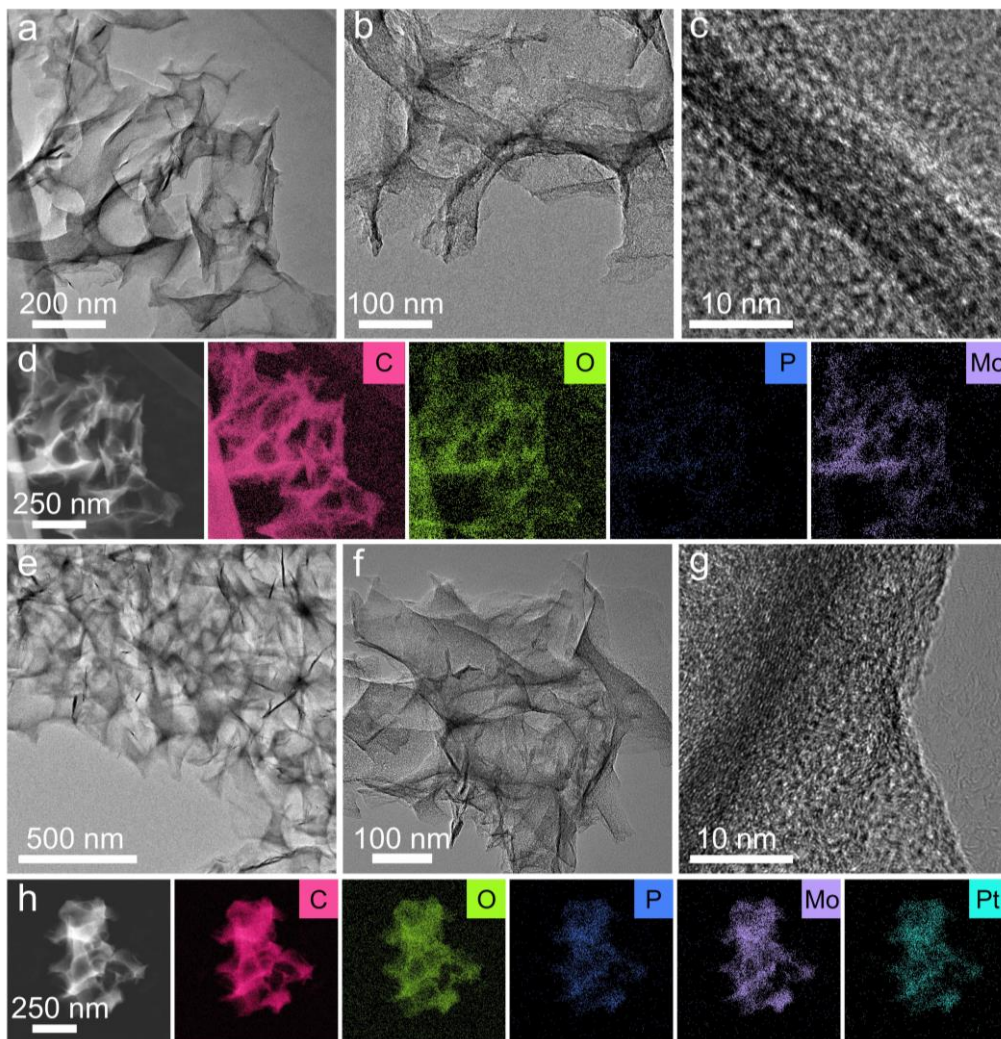

**Fig. S17.** (a–d) TEM images of PMo<sub>12</sub>@PC and corresponding EDS mapping images of C, O, P, and Mo elements. (e–h) TEM images of Pt<sub>1</sub>@PMo<sub>12</sub>@PC and corresponding EDS mapping images of C, O, P, Mo, and Pt elements.

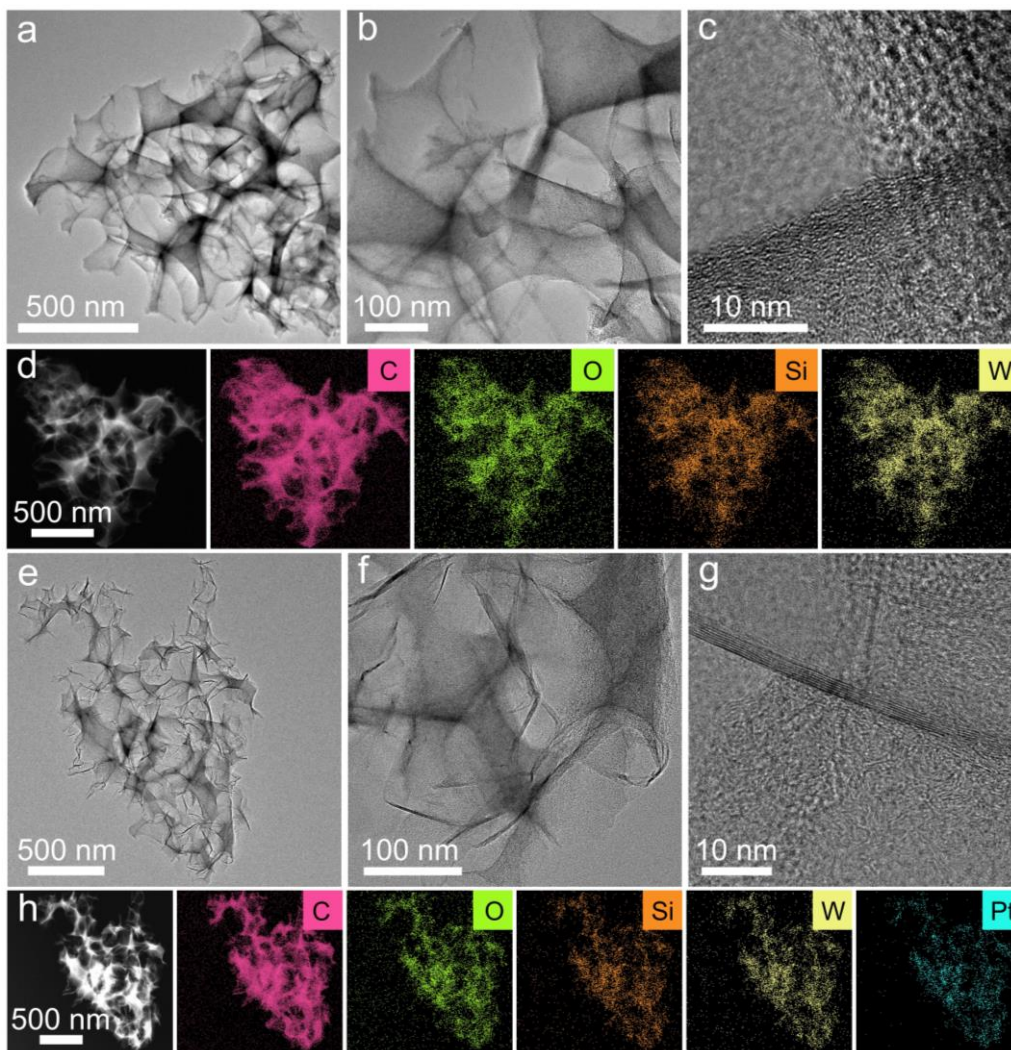

**Fig. S18.** (a–d) TEM images of SiW<sub>12</sub>@PC and corresponding EDS mapping images of C, O, Si, and W elements. (e–h) TEM images of Pt<sub>1</sub>@SiW<sub>12</sub>@PC and corresponding EDS mapping images of C, O, Si, W, and Pt elements.



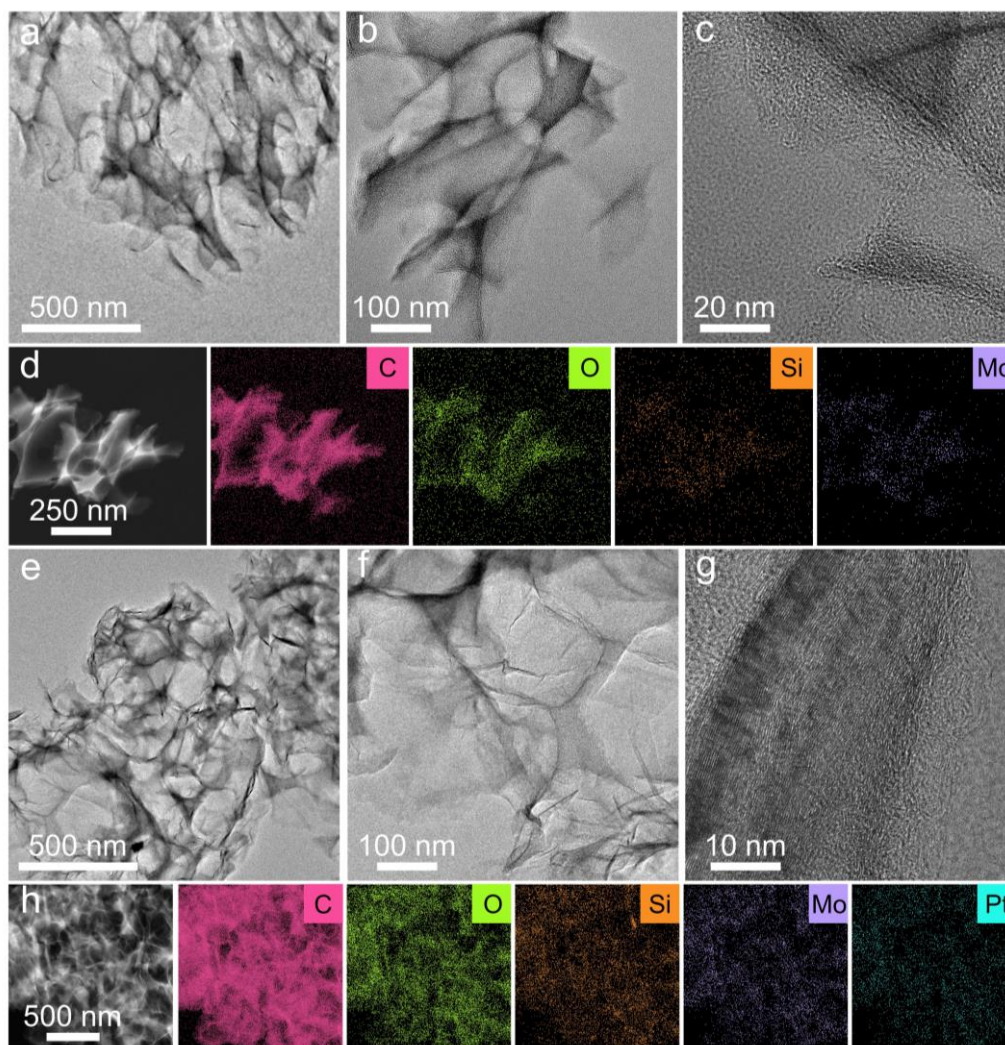

**Fig. S19.** (a–d) TEM images of SiMo<sub>12</sub>@PC and corresponding EDS mapping images of C, O, Si, and Mo elements. (e–h) TEM images of Pt<sub>1</sub>@SiMo<sub>12</sub>@PC and corresponding EDS mapping images of C, O, Si, Mo, and Pt elements.

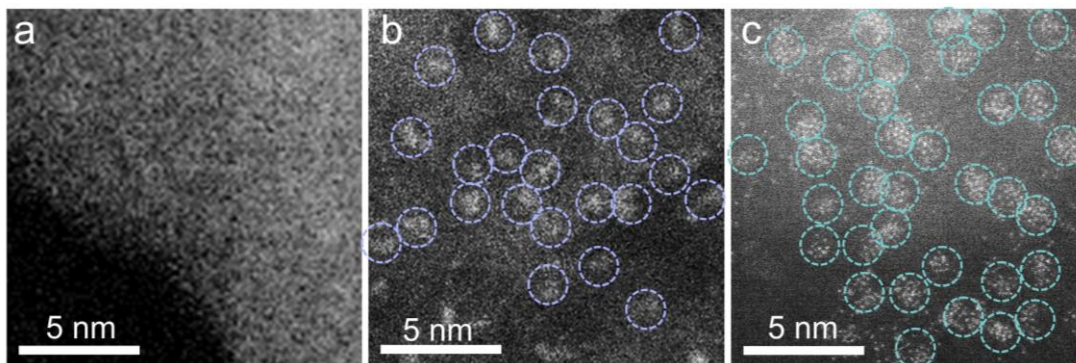

**Fig. S20.** HAADF-STEM images of (a) PC, (b)  $\text{PMo}_{12}$ @PC, and (c)  $\text{PW}_{12}$ @PC.

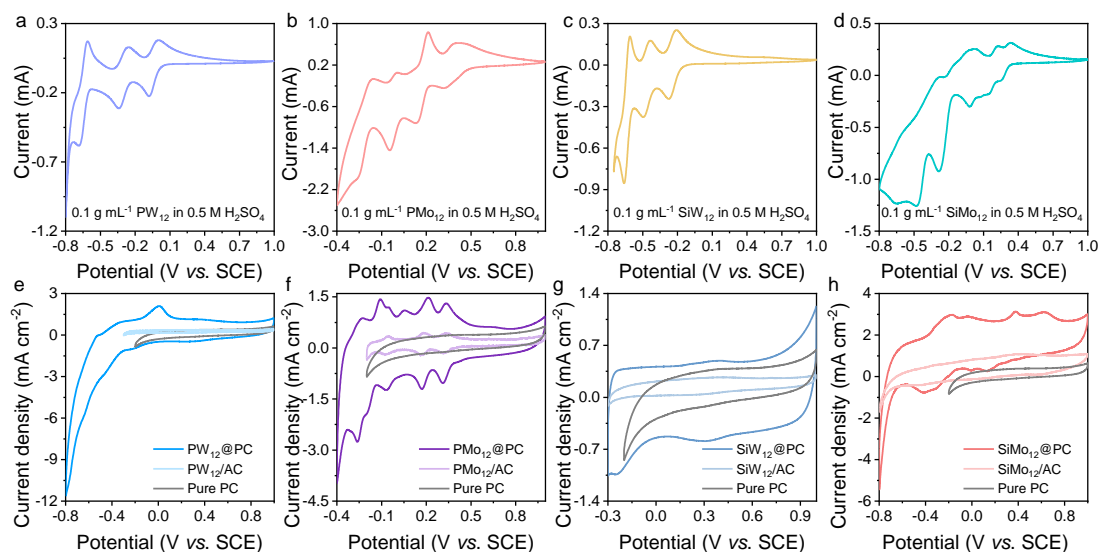

**Fig. S21.** CV curves of (a) pure  $\text{PW}_{12}$  solution, (b) pure  $\text{PMo}_{12}$  solution, (c) pure  $\text{SiW}_{12}$  solution, and (d) pure  $\text{SiMo}_{12}$  solution in  $0.5 \text{ M H}_2\text{SO}_4$  at  $40 \text{ mV s}^{-1}$ . (e–h) CV curves of PC, POMs/AC, and POMs@PC in  $0.5 \text{ M H}_2\text{SO}_4$  at  $40 \text{ mV s}^{-1}$ .

Note that the concentration of pure  $\text{PMo}_{12}$  here is  $\sim 53$ -fold of that ( $1 \text{ mM}$ ) confined in PC, because that the redox peaks of  $1 \text{ mM}$  pure POMs solutions in  $0.5 \text{ M H}_2\text{SO}_4$  are difficult to be detected. As shown in **Fig. S21**, the redox peaks of POMs are essentially invisible in conventional unconfined materials (POMs/AC). On the contrary, several pairs of successive reversible redox peaks of POMs are stimulated in POMs@PC due to the confinement of isolated POMs in PC. So, the monodisperse state of POMs in POMs@PC is also confirmed by the presence of multiple-intrinsic redox peaks induced by the precise confinement, which are invisible in conventional POMs/AC.

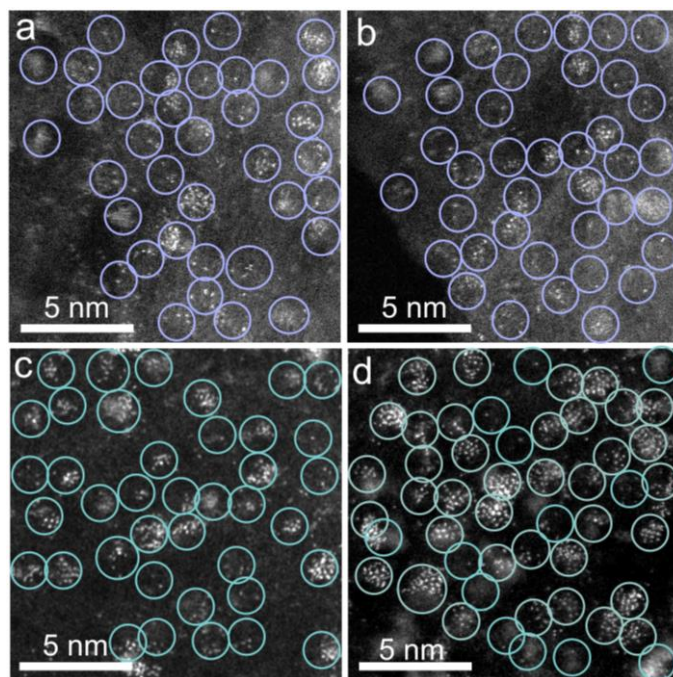

**Fig. S22.** HAADF-STEM images of (a) Pt<sub>1</sub>@PMO<sub>12</sub>@PC and (b) Pt<sub>1</sub>@PW<sub>12</sub>@PC.

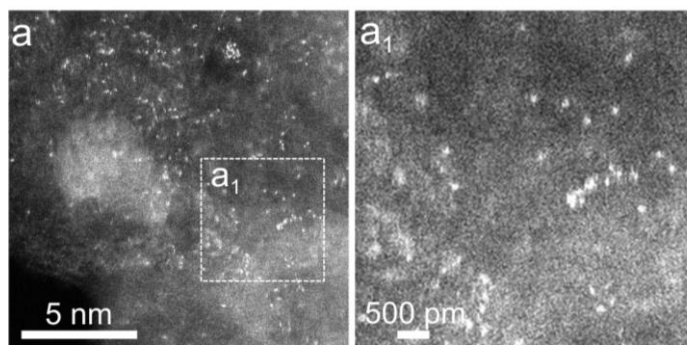

**Fig. S23.** HAADF-STEM image of Pt<sub>1</sub>@PC. Enlarged HAADF-STEM image of the square region in a<sub>1</sub>.

Considering the suitable pore size of PC, the free [PtCl<sub>6</sub>]<sup>2-</sup> ions (~ 0.5 nm)<sup>13</sup> can also be captured by pure PC via the Pt–O coordination effect, as bright dots being identified as Pt atoms in Pt<sub>1</sub>@PC.

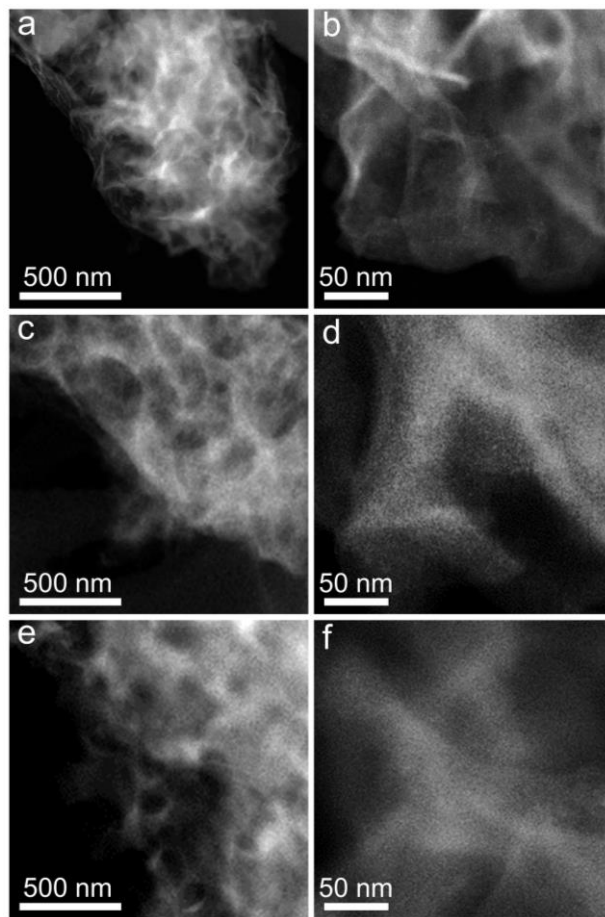

**Fig. S24.** HAADF-STEM images of (a), (b)  $\text{Pt}_1@PMo_{12}@PC$ , (c), (d)  $\text{Pt}_1@PW_{12}@PC$ , and (e), (f)  $\text{Pt}_1@PC$ .

Sub-angstrom resolution HAADF-STEM images show that the morphology of PC is well preserved with maintained silk-like interconnected frameworks after POMs and Pt loading with no nanoparticles or clusters found at low magnification.



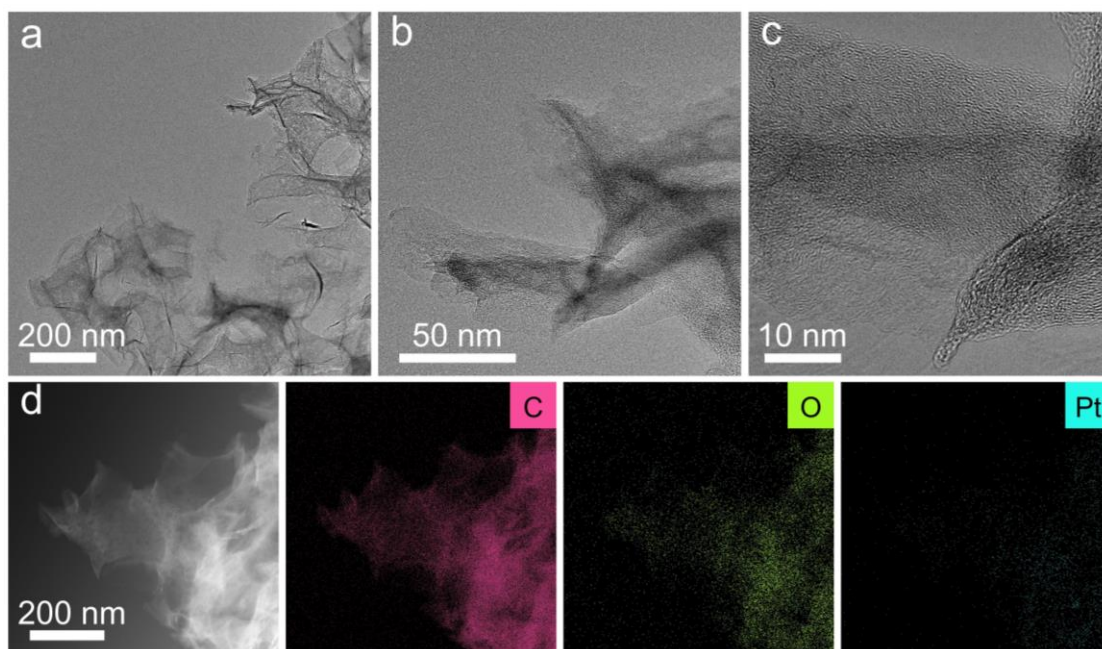

**Fig. S25.** TEM images of Pt<sub>1</sub>@PC and corresponding EDS mapping images of C, O, and Pt elements.

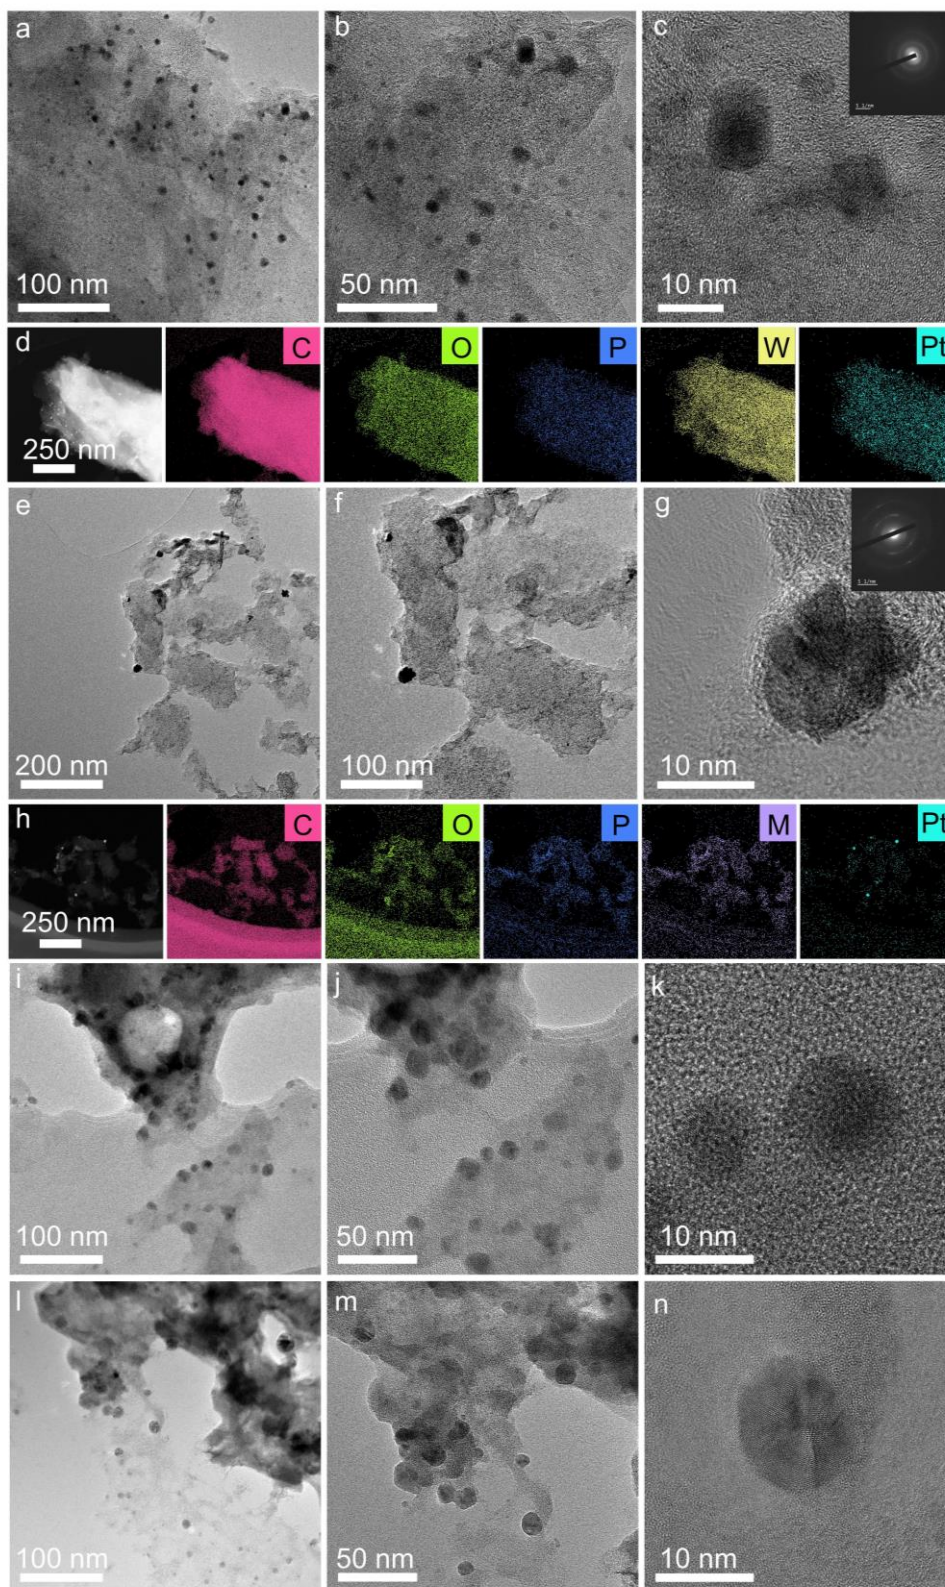

**Fig. S26.** (a–d) TEM images of Pt-PW<sub>12</sub>/AC and corresponding EDS mapping images of C, O, P, W, and Pt elements. (e–h) TEM images of Pt-PMo<sub>12</sub>/AC and corresponding EDS mapping images of C, O, P, Mo, and Pt elements. TEM images of (i–k) Pt-SiW<sub>12</sub>/AC and (l–n) Pt-SiMo<sub>12</sub>/AC.



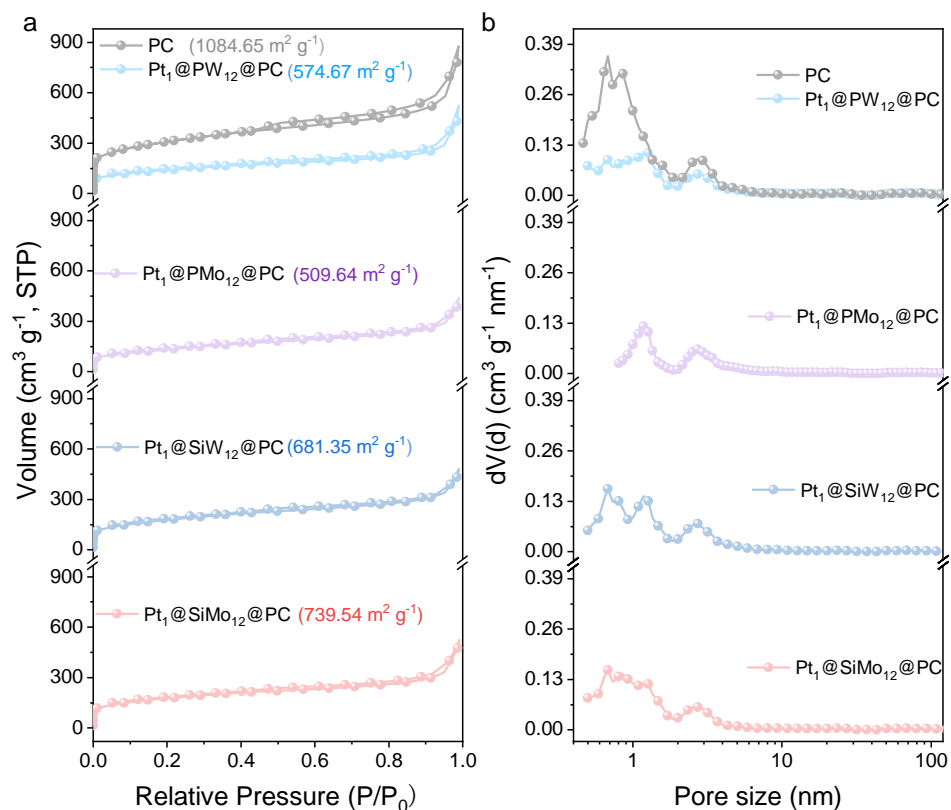

**Fig. S27.** (a) N<sub>2</sub> sorption isotherms. (b) Pore size distributions calculated by non-local density functional theory (NLDFT).

The nitrogen adsorption isotherms of Pt<sub>1</sub>@POMs@PC were recorded at 77 K. In **Fig. S27a**, all samples exhibit reversible type II form, presumably attributing to the presence of a large number of super-micropores in these samples. The N<sub>2</sub> uptake capacity at saturation was reduced significantly after the confinement of POMs Pt and atoms into the pores of PC. Correspondingly, the pore size distributions are also in agreement with these results (**Fig. S27b**).

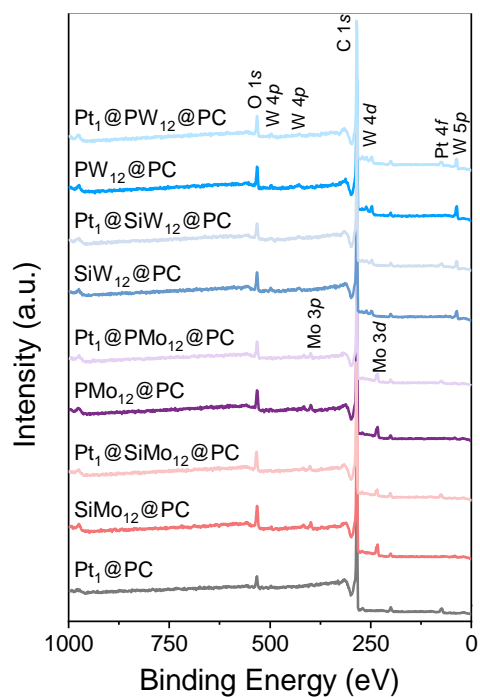

**Fig. S28.** XPS survey spectra of Pt<sub>1</sub>@PC and Pt<sub>1</sub>@POMs@PC.

XPS mapping allows qualitative analysis of the chemical valence state and electronic structure of elements to infer the interactions between substances. **Fig. S28** exhibits the full XPS survey of Pt<sub>1</sub>@PC, POMs@PC, Pt<sub>1</sub>@POMs@PC, which verifies the presence of main elements such as Pt, Mo, W, C, and O.<sup>14, 15</sup>

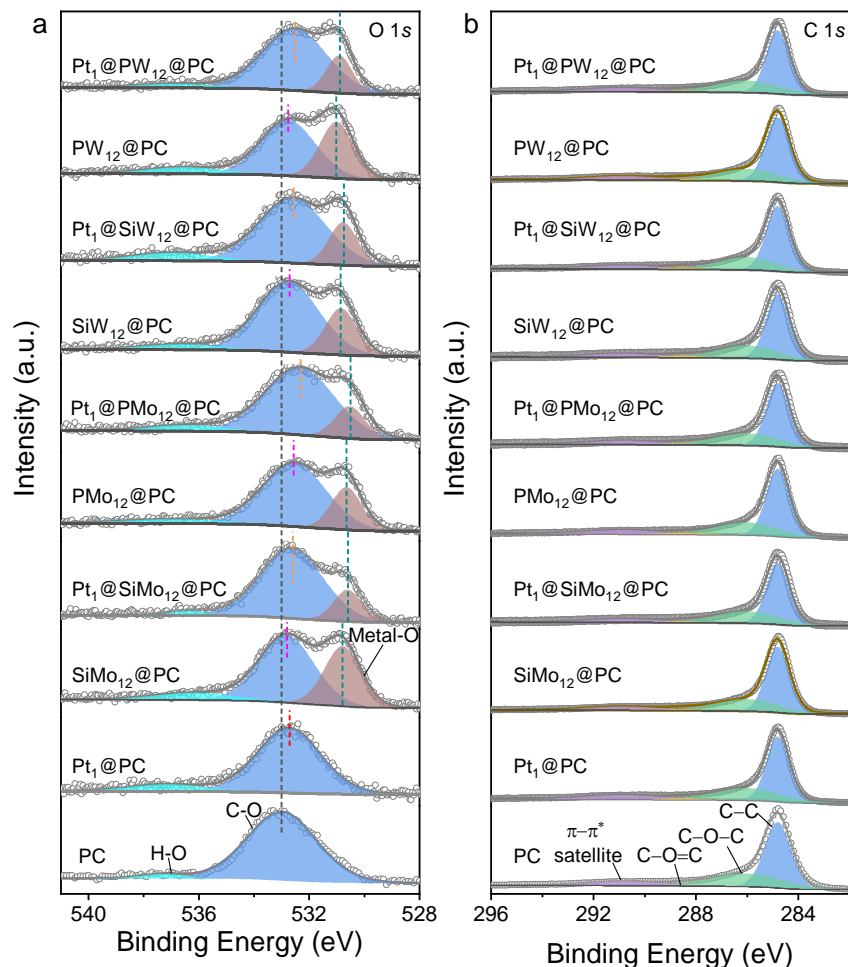

**Fig. S29.** The high-resolution XPS spectra of Pt<sub>1</sub>@PC and Pt<sub>1</sub>@POMs@PC in (a) O 1s and (b) C 1s regions.

A negative shift of C–O for POMs@PC and Pt<sub>1</sub>@POMs@PC compared with the PC (533.097 eV) also verifies electron transfer between PC, POMs, and Pt. Note that the peak at about 539.5–531.0 is ascribed to W/Mo–O–W/Mo and W/Mo=O of POMs.<sup>13</sup> The peak at about 536–537 eV for all samples is assigned to the presence of the hydroxyl (O–H), which may be ascribed to the presence of hydrogen protons connected to oxygen atoms and the crystal H<sub>2</sub>O adsorbed throughout the POM molecule.<sup>14</sup> The XPS spectra of C 1s is shown in **Fig. S29b**, the peak at 284.8 eV, 286 eV, 288.5 eV, and 290.8 eV can be ascribed to C–C, C–O–C, O–C=O, and  $\pi-\pi^*$  transitions of aromatic C–C, respectively. Simultaneously, the C 1s for all control samples are also similar, thus the structural uniformity of the PC matrix is maintained regardless of the incorporation of POMs or H<sub>2</sub>PtCl<sub>6</sub>. That the metal–C bond (283 eV) is not obvious, which indicating the absence of the Pt–C bond for all samples.

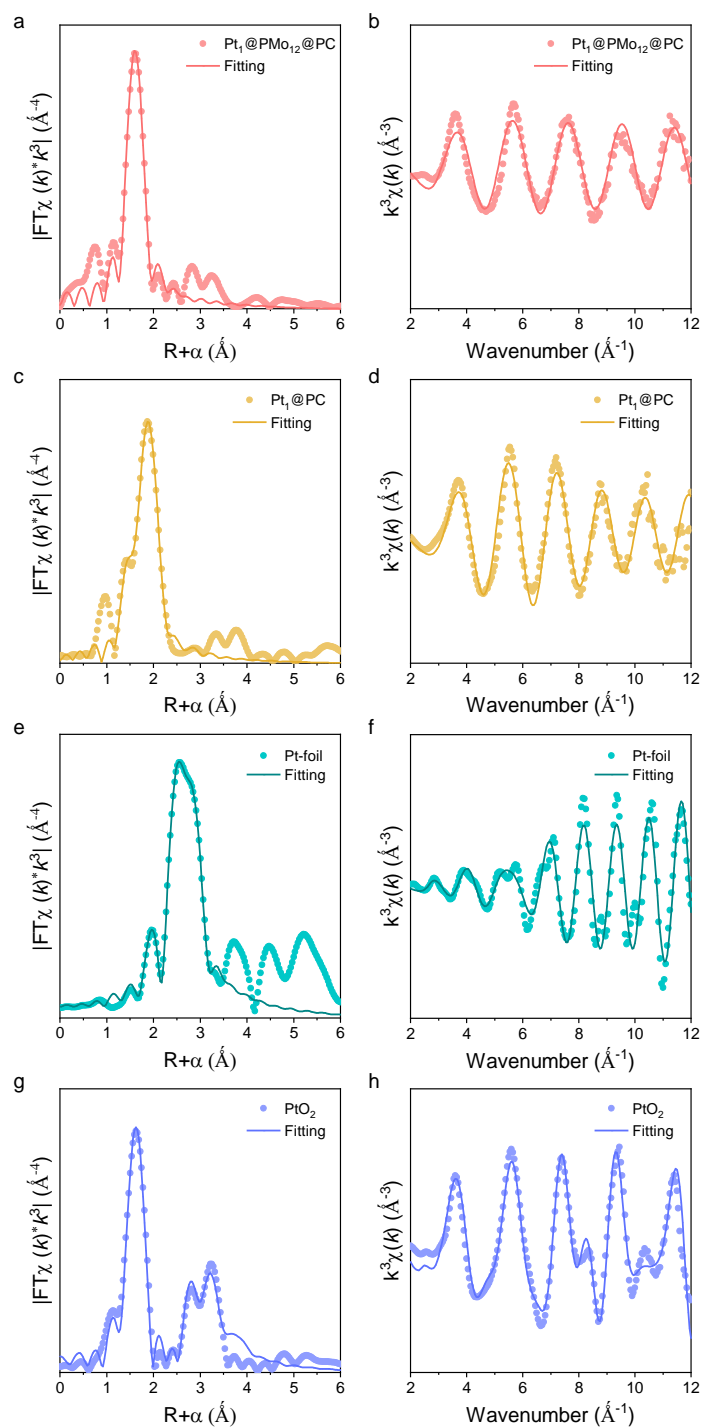

**Fig. S30.** EXAFS fitting curves of Pt<sub>1</sub>@PMo<sub>12</sub>@PC, Pt<sub>1</sub>@PC, Pt-foil, and PtO<sub>2</sub> at Pt L3-edge of (a), (c), (e), (g) *R*-space and (b), (d), (f), (h) *k*-space, respectively.

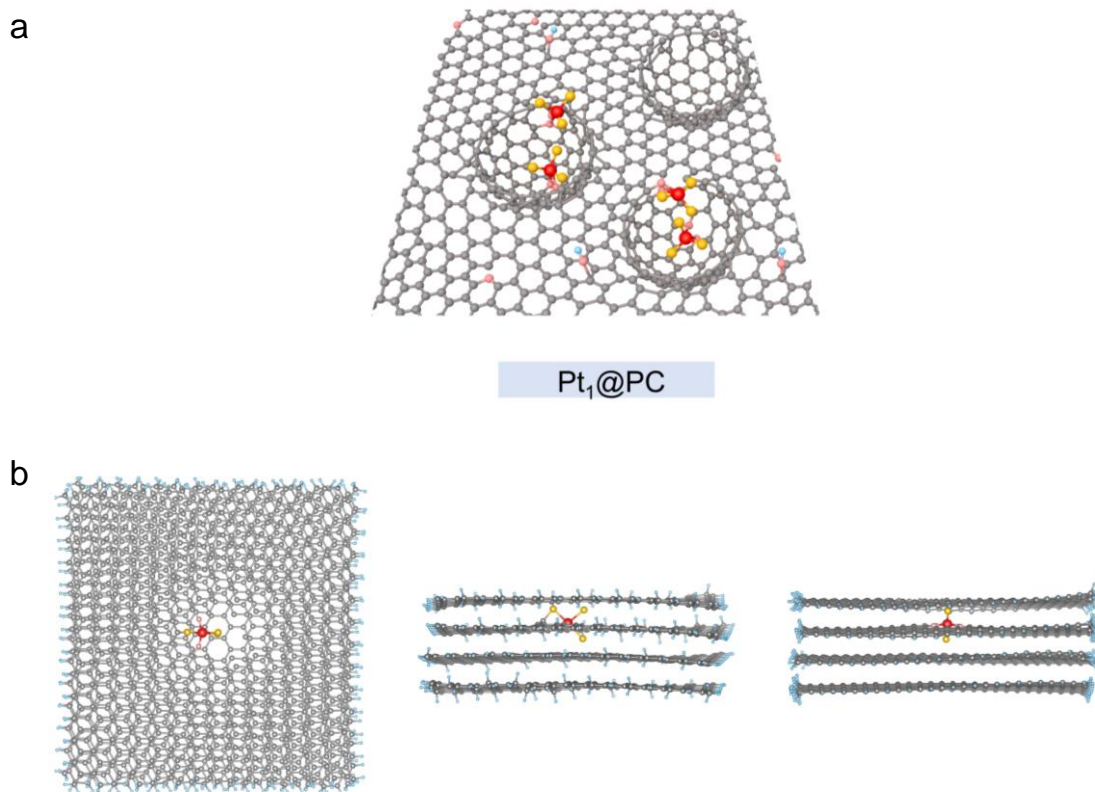

**Fig. S31.** (a) Schematic illustration of Pt<sub>1</sub>@PC. (b) Optimized structural models showing the top view, front view, and side view of PtCl<sub>3</sub>-O<sub>2</sub>@G.

Pt-O (2.058 Å) and Pt-Cl (2.322 Å) with a coordination number of two and three, respectively, are shown in Pt<sub>1</sub>@PC, suggesting that the actual configuration of Pt<sub>1</sub>@PC is PtCl<sub>3</sub>-O<sub>2</sub>@PC. It is apparent that Cl is not completely cleaved from the precursor, which may be toxic to Pt atoms. The actual configuration of Pt<sub>1</sub>@PC is shown in **Fig. S31a**, which is expressed as PtCl<sub>3</sub>-O<sub>2</sub>@G. Note that xTB analysis displays a strong binding energy (-2.74 eV) between PtCl<sub>3</sub> and O<sub>2</sub>@PC, which is detrimental to the exposure of the Pt active site (**Fig. S31b**).

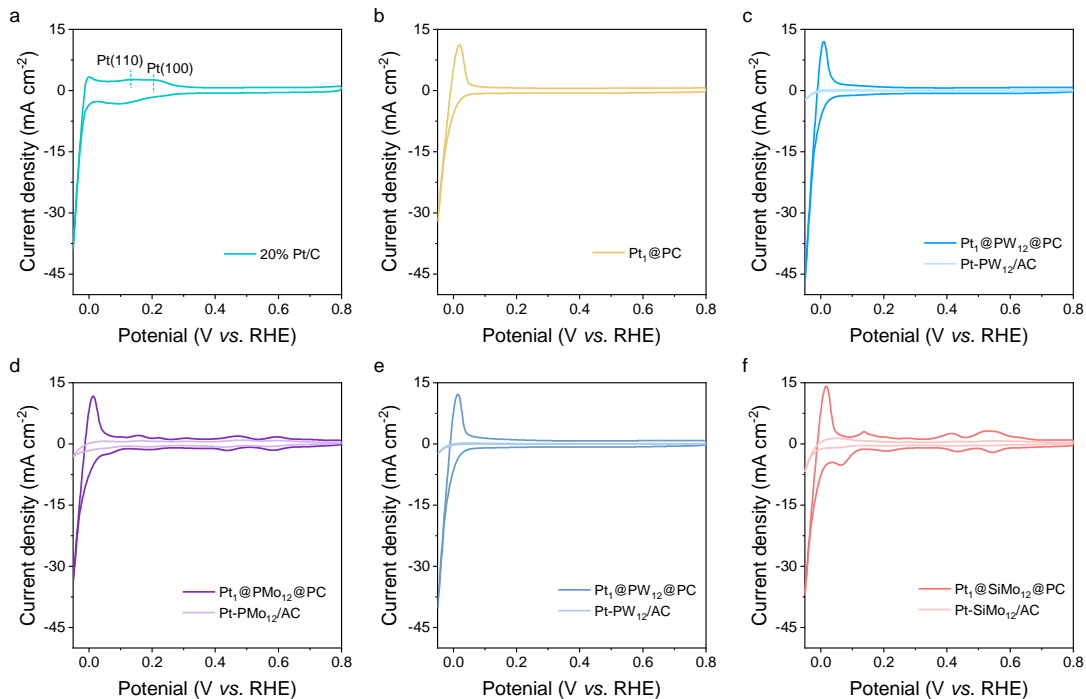

**Fig. S32.** CV curves of (a) 20% Pt/C, (b) Pt<sub>1</sub>@PC, (c)–(f) Pt-POMs/AC and Pt<sub>1</sub>@POMs@PC in 0.5 M H<sub>2</sub>SO<sub>4</sub> at 40 mV s<sup>-1</sup>.

The hydrogen desorption peak of Pt(100) and Pt(110) of 20% Pt/C is absent in CV curves of Pt<sub>1</sub>@POMs@PC and Pt<sub>1</sub>@PC in 0.5 M H<sub>2</sub>SO<sub>4</sub>, indicating the atomic state distribution of Pt element in Pt<sub>1</sub>@POMs@PC and Pt<sub>1</sub>@PC (Fig. S32).<sup>16</sup> Moreover, the more obvious hydrogen desorption peak of Pt SAs for Pt<sub>1</sub>@POMs@PC than that in Pt-POMs/AC suggests that more absorbed hydrogen would be generated on the catalyst surface, which is conducive to the hydrogen spillover.

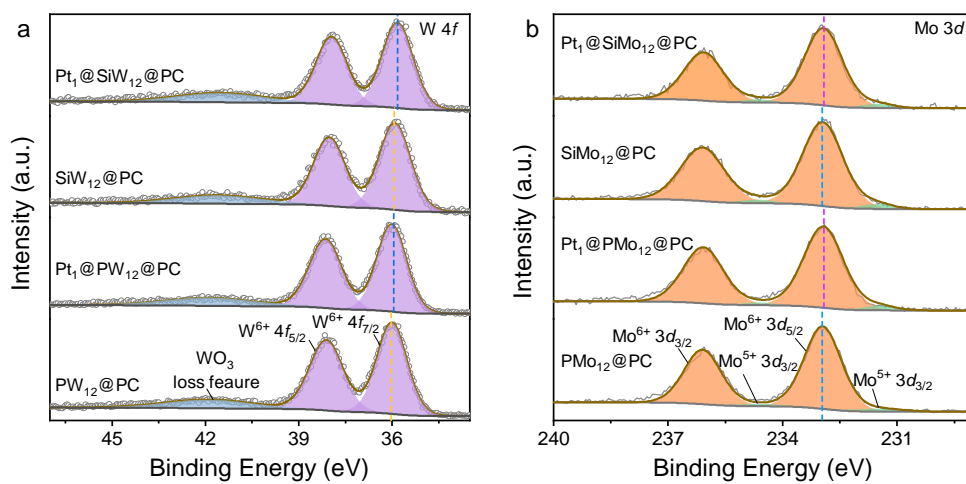

**Fig. S33.** The high-resolution XPS spectra of (a) W 4f and (b) Mo 3d.

Compared with POMs@PC, negatively shifted W<sup>6+</sup> 4f and Mo<sup>6+</sup> 3d peaks of Pt<sub>1</sub>@POMs@PC<sup>17</sup> reveals the accumulated electrons on W/Mo atoms.

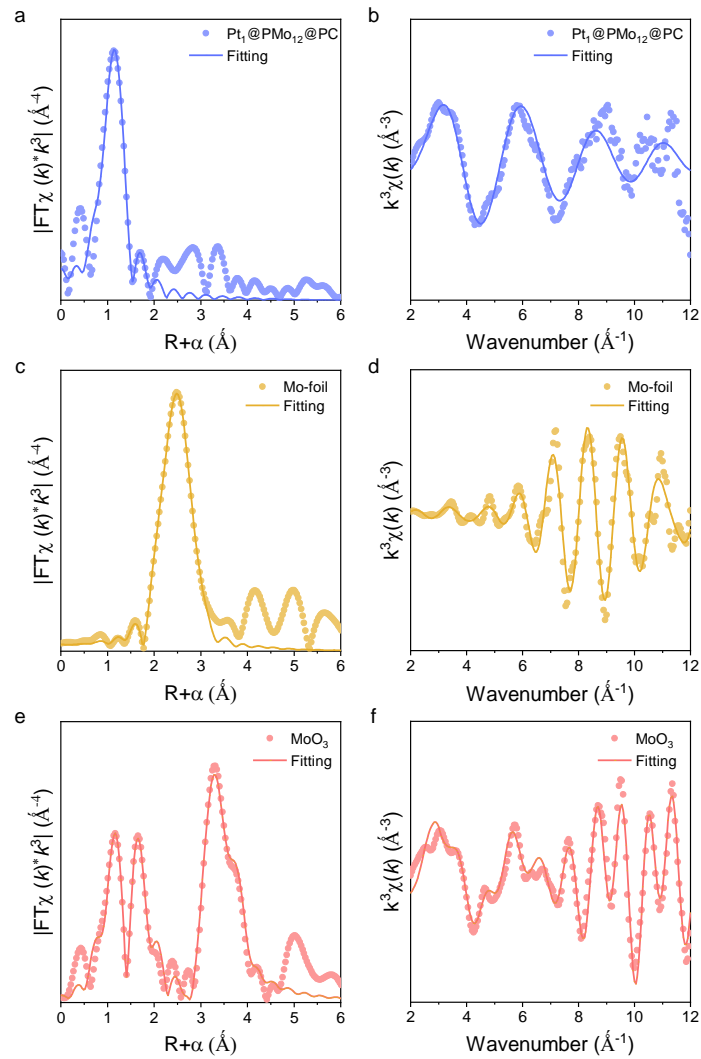

**Fig. S34.** EXAFS fitting curves of Pt<sub>1</sub>@PMo<sub>12</sub>@PC, Mo-foil, and MoO<sub>3</sub> at Mo *K*-edge of (a), (c), (e) *R*-space and (b), (d), (f) *k*-space, respectively.



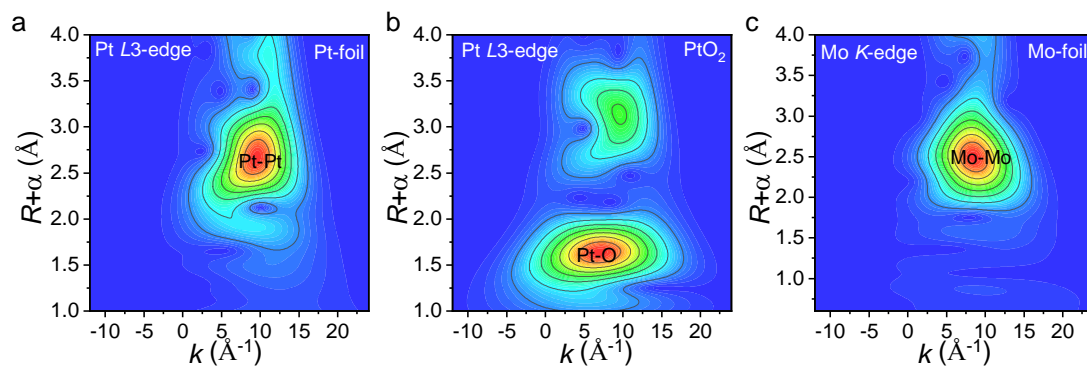

**Fig. S35.** Wavelet-transform images of (a) Pt-foil and (b) PtO<sub>2</sub> at Pt L3-edge and (c) Mo-foil at Mo K-edge.

For Wavelet Transform analysis, the  $\chi(k)$  exported from Athena is imported into the Hama Fortran code. The parameters are listed as follow: R range, Pt: 1-4 Å, Mo: 0.6-4 Å;  $k$  range, 0-12.0 Å<sup>-1</sup>;  $k$  weight, 3; and Morlet function with  $\kappa=15$ ,  $\sigma=1$  is used as the mother wavelet to provide the overall distribution.

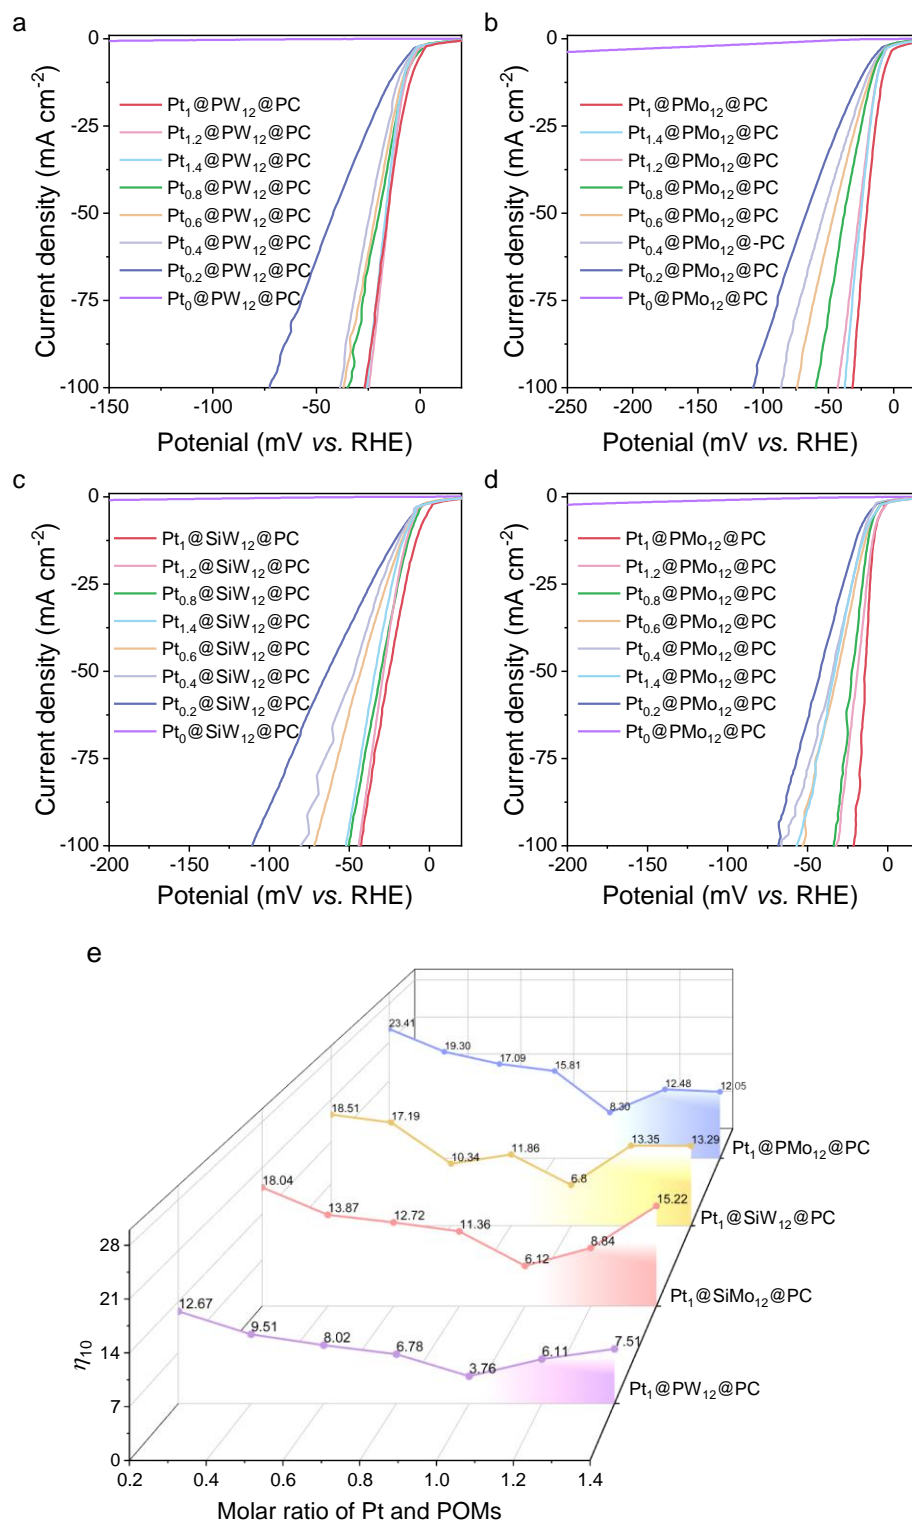

**Fig. S36.** (a–d) LSV curves of the Pt<sub>x</sub>@POMs@PC in 0.5 M H<sub>2</sub>SO<sub>4</sub> solution at 40 mV s<sup>-1</sup> (*x* represents the molar ratio of Pt and POMs). (e) The overpotentials at 10 mA cm<sup>-2</sup> of Pt<sub>x</sub>@POMs@PC.

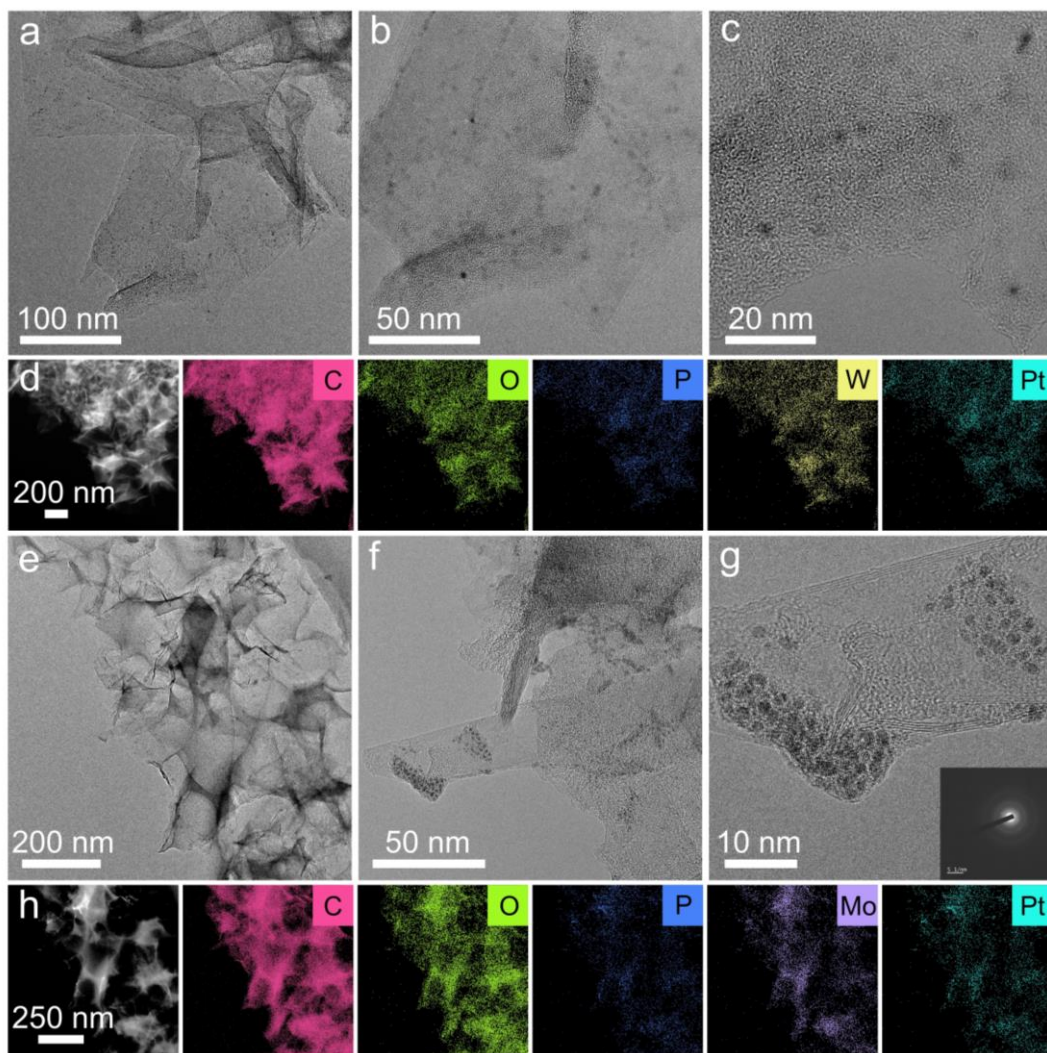

**Fig. S37.** (a–d) TEM images of  $\text{Pt}_{1.4}@\text{PW}_{12}@\text{PC}$  and corresponding EDS mapping images of C, O, P, W, and Pt elements. (e–h) TEM images of  $\text{Pt}_{1.4}@\text{PMo}_{12}@\text{PC}$  and corresponding EDS mapping images of C, O, P, Mo, and Pt elements.

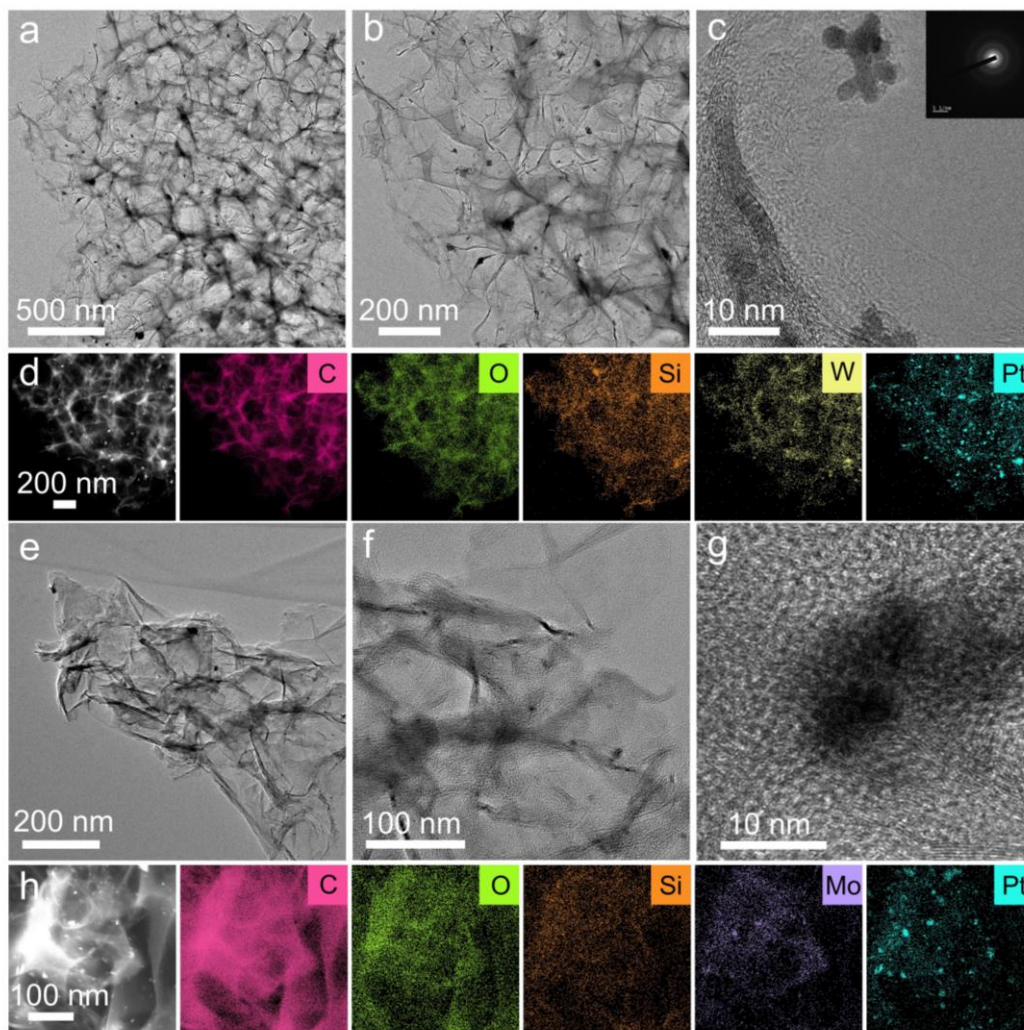

**Fig. S38.** (a–d) TEM images of Pt<sub>1.4</sub>@SiW<sub>12</sub>@PC and corresponding EDS mapping images of C, O, Si, W, and Pt elements. (e–h) TEM images of Pt<sub>1.4</sub>@SiMo<sub>12</sub>@PC and corresponding EDS mapping images of C, O, Si, Mo, and Pt elements.

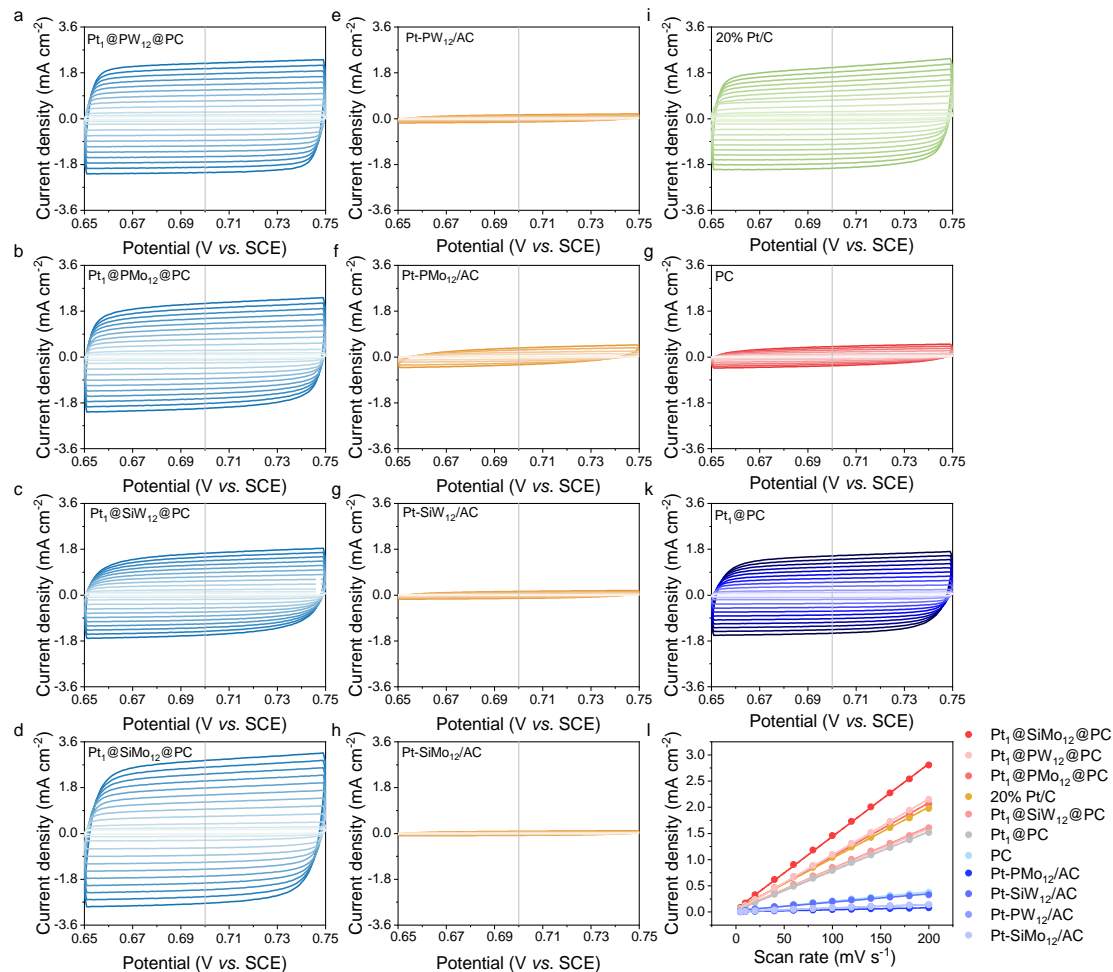

**Fig. S39.** (a)–(k) Cyclic voltammetry curves in the region of 0.65–0.75 V (*vs.* SCE) of samples with different scan rates from 5 to 200  $\text{mV s}^{-1}$  in 0.5 M  $\text{H}_2\text{SO}_4$ . (l) Calculated capacitive currents at 0.7 V (*vs.* SCE) as a function of scan rates.

The geometric current density ( $j$ ) normalized by electrochemical active surface area (ECSA;  $j_{\text{ECSA}}$ ), as determined by deriving the electrochemical double-layer capacitance, ( $C_{\text{dl}}$ ), was applied to identify the intrinsic activity of  $\text{Pt}_1$ @POMs@PC. The  $C_{\text{dl}}$  values and ECSA values were measured, as shown in **Table S5**. The ECSA corresponding to the dual-confinement system is larger than that of  $\text{Pt}_1$ @PC, which may be due to the improved electron transfer driven by confined POMs.



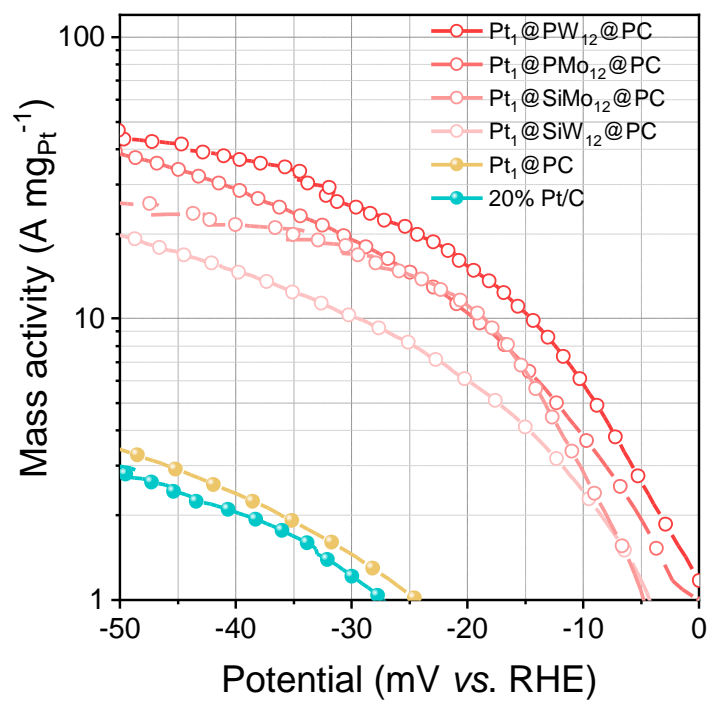

**Fig. S40.** Mass activity values of Pt<sub>1</sub>@POMs@PC, Pt<sub>1</sub>@PC, and 20% Pt/C in 0.5 M H<sub>2</sub>SO<sub>4</sub>.



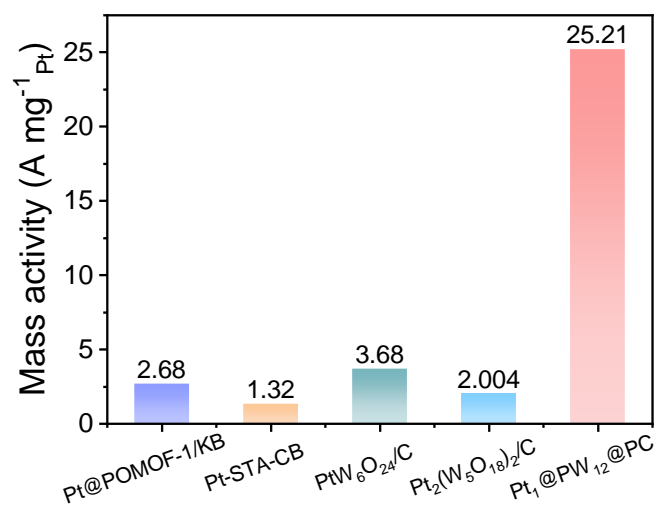

**Fig. S41.** Comparison of mass activity at  $\eta_{30}$  for Pt/POMs-contained composite catalysts in HER.

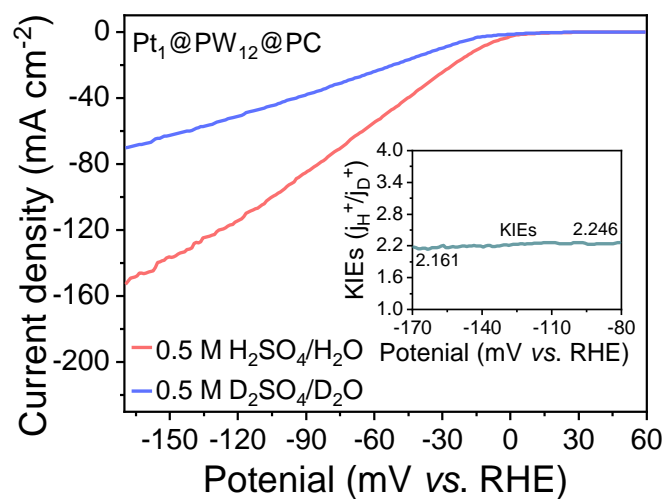

**Fig. S42.** Polarization curves of Pt<sub>1</sub>@PW<sub>12</sub>@PC catalyst in aqueous 0.5 M H<sub>2</sub>SO<sub>4</sub> and 0.5 M D<sub>2</sub>SO<sub>4</sub> solutions. The inset is the kinetic isotope effect value vs. potential.

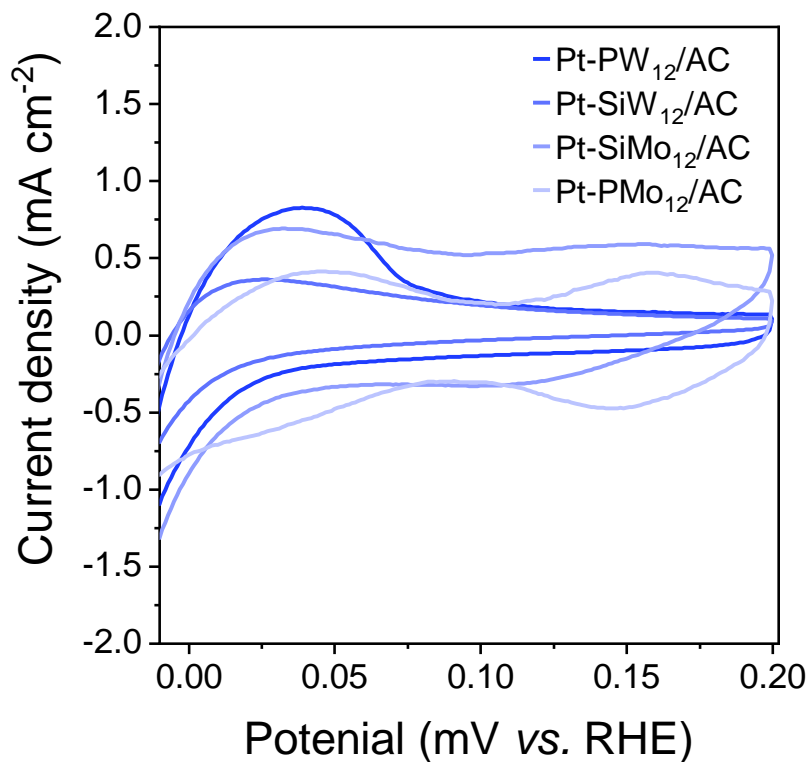

**Fig. S43.** Hydrogen desorption region of the steady-state cyclic voltammetry curves for Pt-POMs/AC at a scan rate of 50 mV s<sup>-1</sup>.

Generally, electrochemical adsorption of hydrogen on the surface of precious metals can occur at a more positive potential (viz. underpotential) compared to RHE. Meanwhile, the hydrogen ( $H_{ad}$ ) binding energy (HBE) of a catalyst can be evaluated by such peak potential of absorbed hydrogen desorption peak with CV while hydrogen coverage can be determined by the peak area.<sup>18, 19</sup>

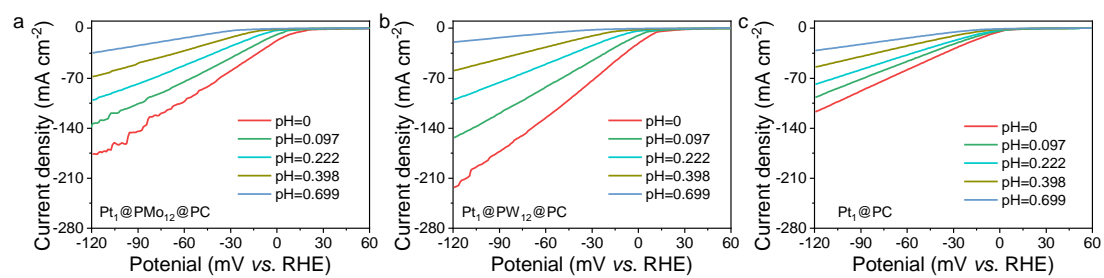

**Fig. S44.** The pH-dependence measurements. LSV curves of (a) Pt<sub>1</sub>@PMo<sub>12</sub>@PC, (b) Pt<sub>1</sub>@PW<sub>12</sub>@PC, and (c) Pt<sub>1</sub>@PC in Ar-saturated H<sub>2</sub>SO<sub>4</sub> electrolyte with pH ranging from 0 to 0.699.

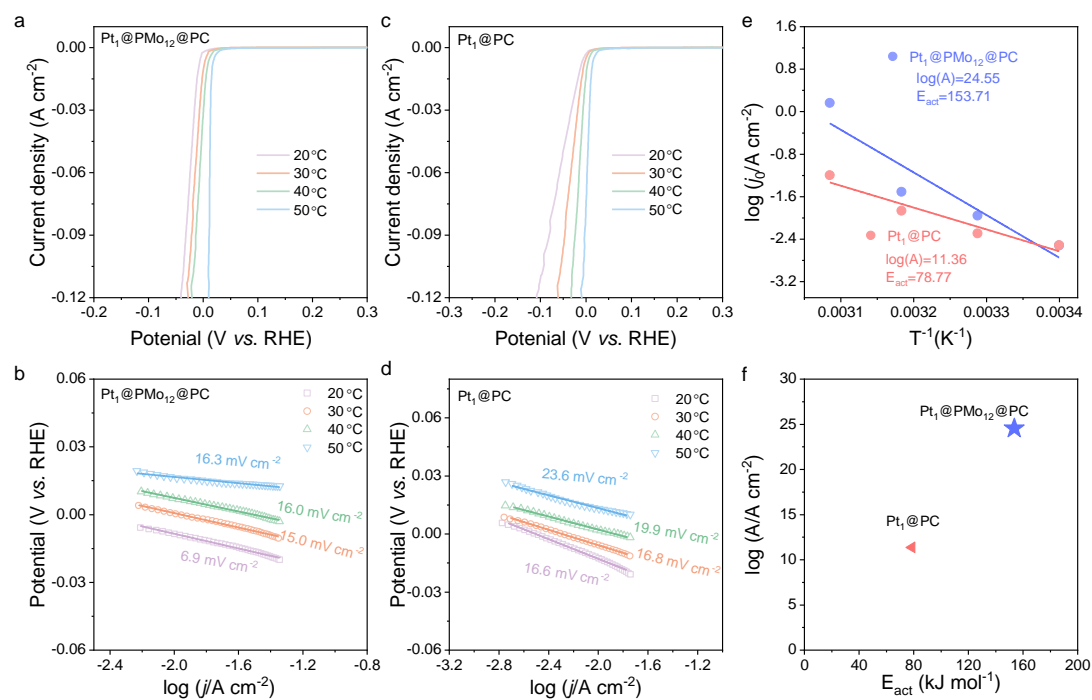

**Fig. S45.** Example of Ohmic drop-corrected HER polarization curves and Tafel plots for  $\text{Pt}_1@PMo_{12}@PC$  (a, b) and  $\text{Pt}_1@PC$  (c, d) in  $0.5\text{ M H}_2\text{SO}_4$  at four different temperatures, recorded using hydrodynamic LSV using a scan rate of  $5\text{ mV s}^{-1}$  with 1600 rpm. (e) The Arrhenius plot for HER on  $\text{Pt}_1@PMo_{12}@PC$  and  $\text{Pt}_1@PC$  in  $0.5\text{ M H}_2\text{SO}_4$ . (f) Relation between activation energy ( $E_{act}$ ) and the logarithm of pre-exponential factor ( $\log A$ ) as an illustration of the compensation effect for HER in acidic media.



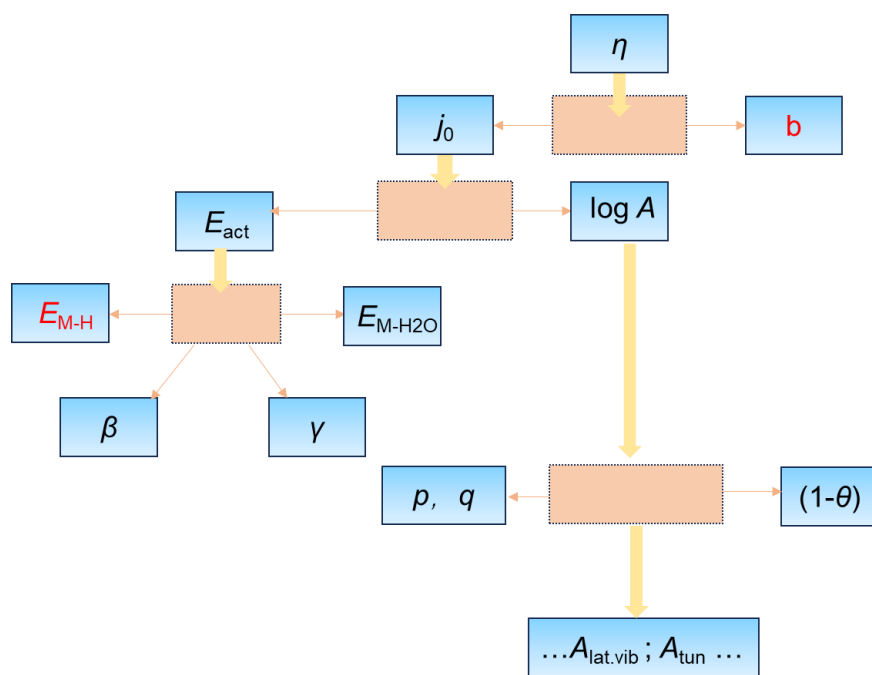

**Fig. S46.** Schematic representation of the rate law “dissection” with an indication of the relevant parameters that could be potentially linked with material properties or interfacial properties of the electrode/electrolyte boundary in acid<sup>20</sup>.

Note that the meaning of each symbol is as follows:  $E_{\text{act}}$ , activation energy;  $A$ , preexponential factor;  $E_{\text{M-H}}$ , intermediate bond strength energy, which is linked with intermediate adsorption energy;  $E_{\text{M-H}_2\text{O}}$ , energy consumed for metal water interaction or water bilayer reconstruction during HER;  $\beta$ , symmetry factor,  $\gamma$ , Bronsted-Evans-Polanyi coefficient,  $p$ , partial order concerning  $\text{H}^+$  ion concentration;  $q$ , the partial order concerning the number of available active sites,  $\theta$  is total coverage,  $A_{\text{lat.vib}}$ , the hypothetical contribution of individual and collective lattice vibrations to effective collisions;  $A_{\text{tun}}$ , the hypothetical contribution of proton tunneling to product formation.

Firstly, LSVs and corresponding Tafel slope on  $\text{Pt}_1@/\text{PMO}_{12}/\text{PC}$  (**Fig. S45a–b**) and  $\text{Pt}_1/\text{PC}$  (**Fig. S45c–d**) at four different temperatures are given. As expected, as the temperature increases, the performance of both catalysts will be enhanced. Then,  $j_0$  and Tafel slope can be obtained from the Tafel plots. The  $E_{\text{act}}$  and preexponential factor determination on our catalysts are further illustrated in **Fig. S45e** and **Note S2** ( $\log j_0$  vs  $1/T$ )<sup>20, 21</sup>. The slope of the inverse temperature dependence of the  $j_0$  comprises  $E_{\text{act}}$ , while the intercept is equal to the logarithm of the pre-exponential factor. Notably, the  $\text{Pt}_1@/\text{PMO}_{12}/\text{PC}$  for HER shows a higher pre-exponential factor than that of  $\text{Pt}_1/\text{PC}$  (**Fig. S45f**). So, the high HER activity of  $\text{Pt}_1@/\text{PMO}_{12}/\text{PC}$  in acidic electrolytes mainly depends on the pre-exponential frequency factor. In **Fig. S46**, it is evident that the  $\text{H}^+$  concentration and the effective collision of reactants with the surface of the electrocatalyst are related to the pre-exponential factor. Therefore, it can be predicted that the H-spillover can encourage more effective collisions of  $\text{H}^+$  with the active surface of Pt and improve the H coverage on the Pt surface. So, we speculate that Arrhenius plots may be used as a criterion for judging the occurrence of H-spillover.

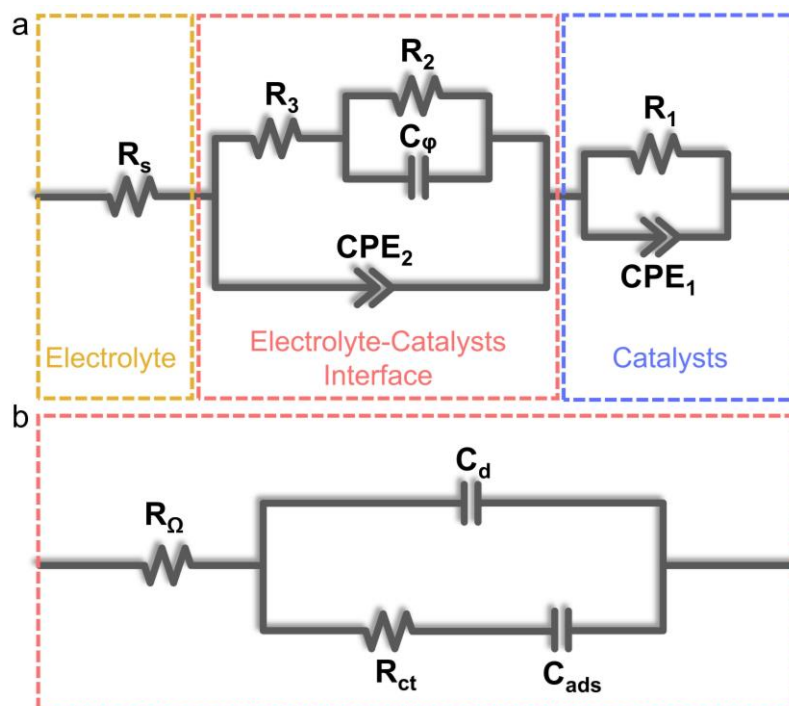

**Fig. S47.** (a) Schematic diagram of the electrode structure and the equivalent circuit model. (b) Equivalent circuit model of intermediate adsorption.

The EIS data was simulated using an equivalent circuit model (**Fig. S47a**) consisting of four parts, namely, electron transfer from the catalyst inner-layer to the reaction interface ( $R_1$  and  $CPE_1$ ), reaction intermediate ( $H_{ad}$ ) adsorption ( $R_2$  and  $C_\phi$ ), catalyst-electrolyte interface charge transfer ( $R_3$  and  $CPE_2$ ), and electrolyte resistance ( $R_s$ ),<sup>22</sup> where CPE refers to constant phase angle components.  $C_\phi$  and  $R_2$  represent Volmer step relating to low-frequency region while  $CPE_2$  and  $R_3$  represent Heyrovsky step associating with middle-frequency region. Note that the intermediate ( $H_{ad}$ ) adsorption behavior on the active sites can be reflected by  $C_\phi$ ,<sup>14, 22, 23</sup> which includes double layer capacitance ( $C_d$ ) and adsorption layer capacitance ( $C_{ads}$ ) (**Fig. S47b**).<sup>24</sup> Besides,  $C_\phi$  as a function of overpotential can be integrated to calculate the hydrogen adsorption charge ( $Q_{H^*}$ ) on a unit area of Pt during HER.<sup>14</sup>

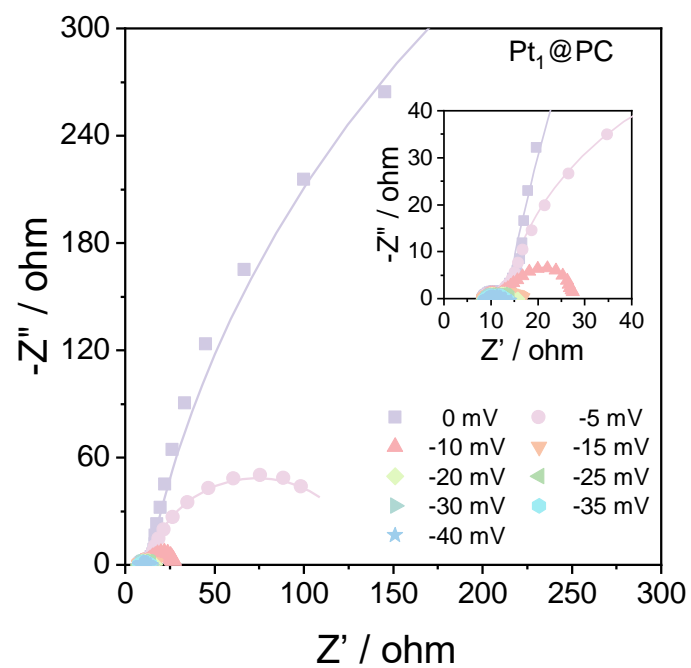

**Fig. S48.** Nyquist plots of Pt<sub>1</sub>@PC at different overpotentials. The inside is a zoomed-in view.

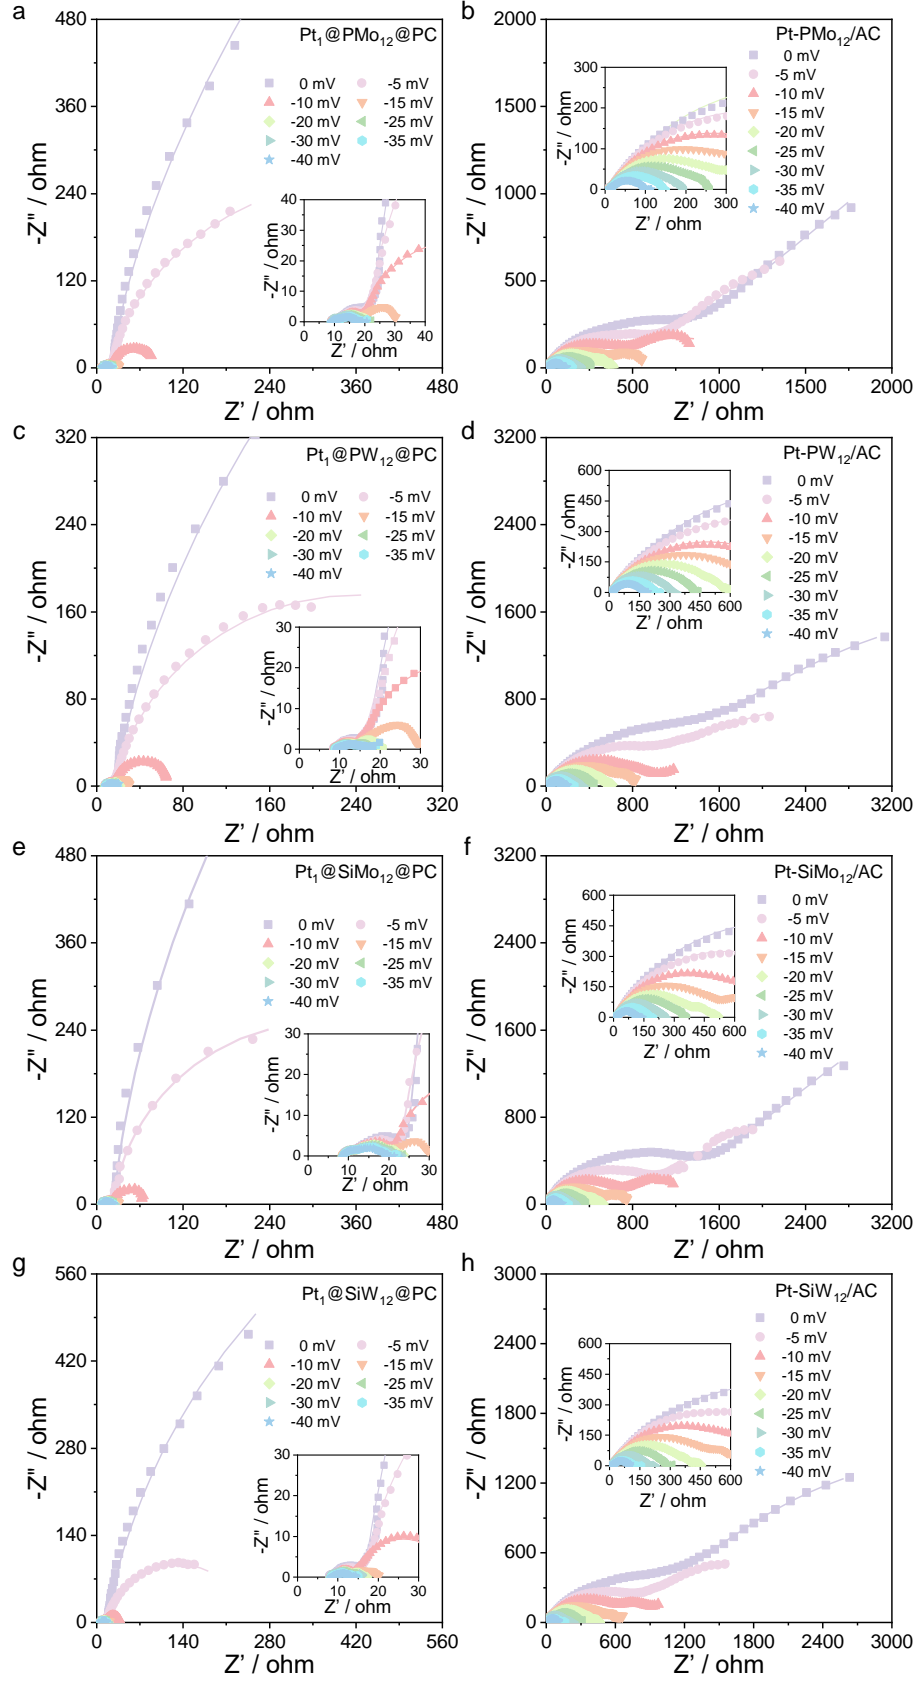

**Fig. S49.** Nyquist plots of Pt<sub>1</sub>@POMs@PC and Pt-POMs/AC at different overpotentials. The inside is a zoomed-in view.

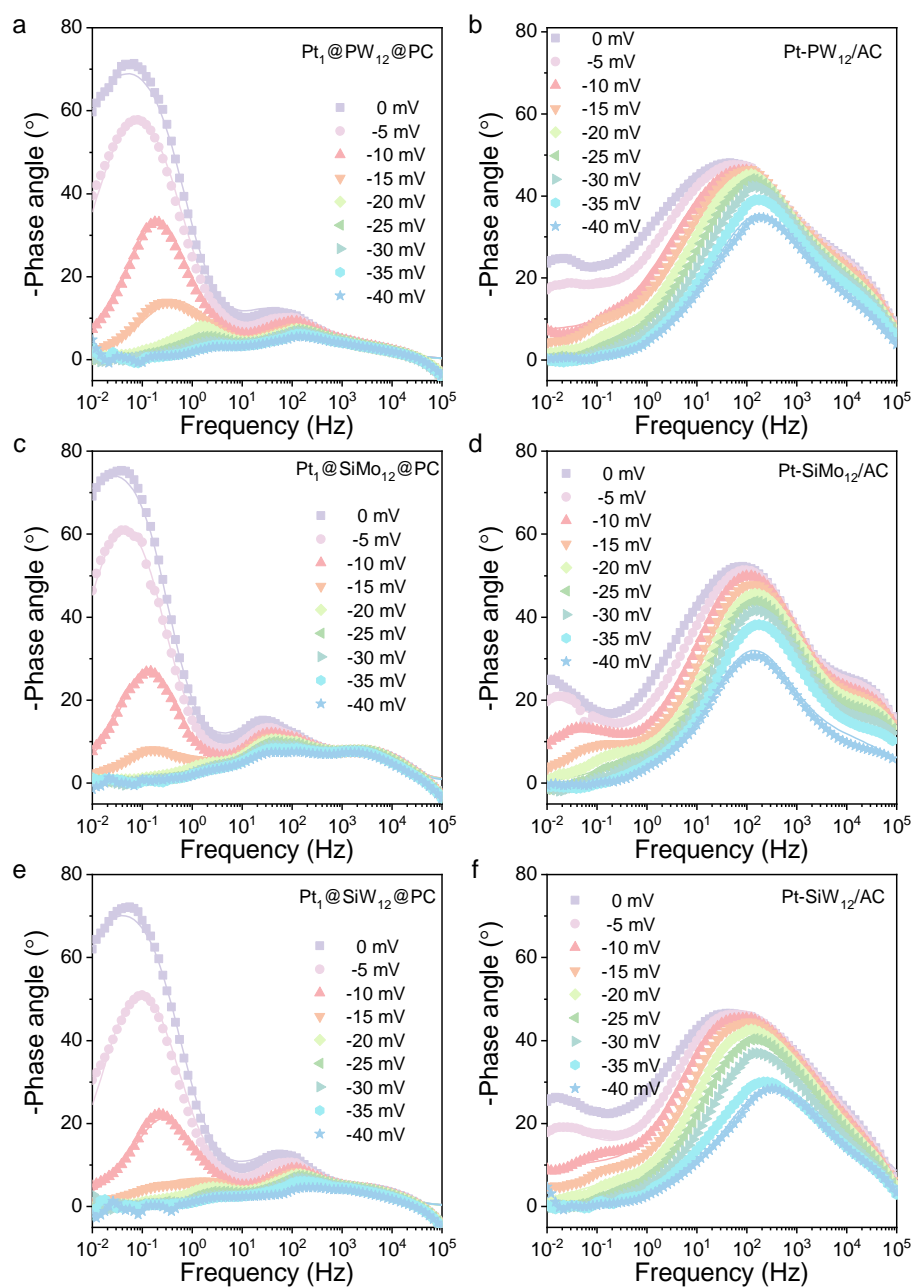

**Fig. S50.** Bode plots of  $\text{Pt}_1\text{@POMs@PC}$  ( $\text{Pt}_1\text{@PW}_{12}\text{@PC}$ ,  $\text{Pt}_1\text{@SiMo}_{12}\text{@PC}$ , and  $\text{Pt}_1\text{@SiW}_{12}\text{@PC}$ ) and  $\text{Pt-POMs/AC}$  ( $\text{Pt-PW}_{12}\text{/AC}$ ,  $\text{Pt-SiW}_{12}\text{/AC}$ , and  $\text{Pt-SiMo}_{12}\text{/AC}$ ) at various overpotentials.



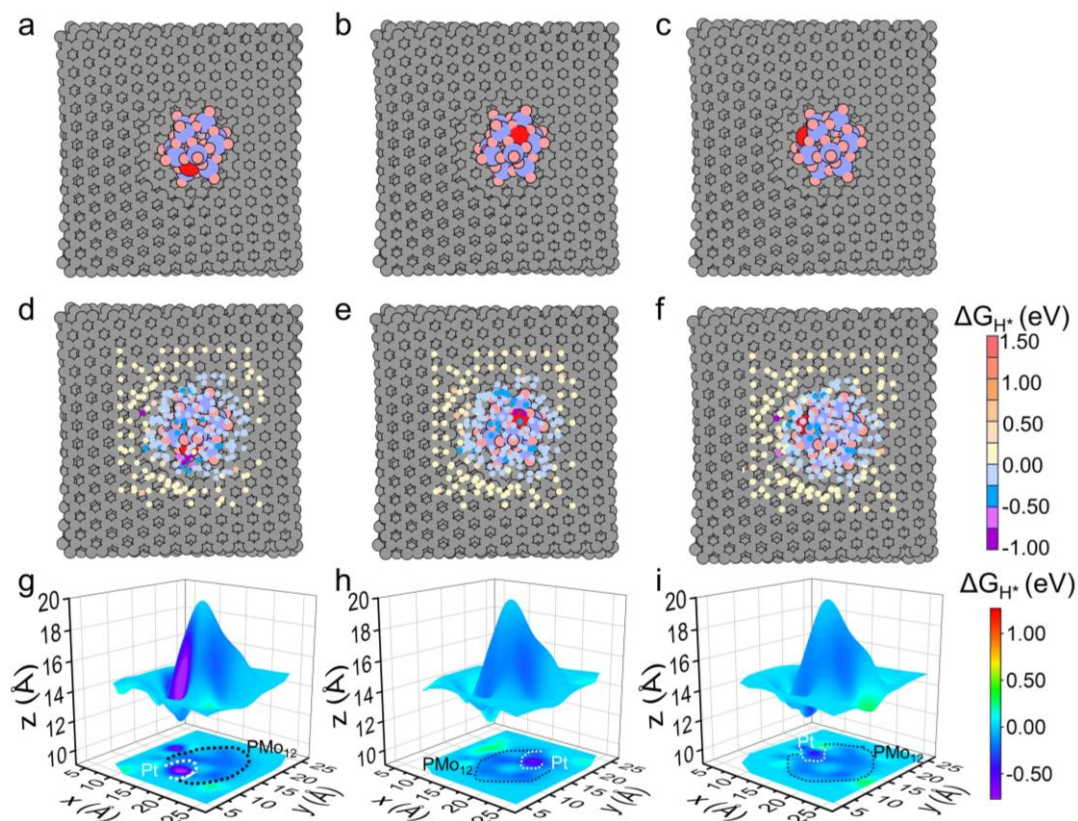

**Fig. S51.** Optimized structural models showing the top view of (a)  $\text{Pt}_1@PMo_{12}@G-01$ , (b)  $\text{Pt}_1@PMo_{12}@G-02$ , and (c)  $\text{Pt}_1@PMo_{12}@G-03$ . H adsorption free energy maps for HER on (d)  $\text{Pt}_1@PMo_{12}@G-01$ , (e)  $\text{Pt}_1@PMo_{12}@G-02$ , and (f)  $\text{Pt}_1@PMo_{12}@G-03$ . Corresponding 3D contour of  $\Delta G_{H^*}$  on (g)  $\text{Pt}_1@PMo_{12}@G-02$ , (h)  $\text{Pt}_1@PMo_{12}@G-02$ , and (i)  $\text{Pt}_1@PMo_{12}@G-03$ .

Since there are three 4H sites exposed on the surface of confined POMs. The H migration processes for three surface O4H sites are calculated and the Pt at the other two surface O4H sites of confined  $PMo_{12}$  are shown in **Fig. S51**. Note that H migration processes at the other two surface O4H sites of confined  $PMo_{12}$  show a similar phenomenon. The  $\Delta G_{H^*}$  gradually decreases, as manifested by the step-by-step discoloration of the  $H^*$  from purple to yellow, which indicates the occurrence of successive  $H^*$  migration processes, representing an H-buffer effect.

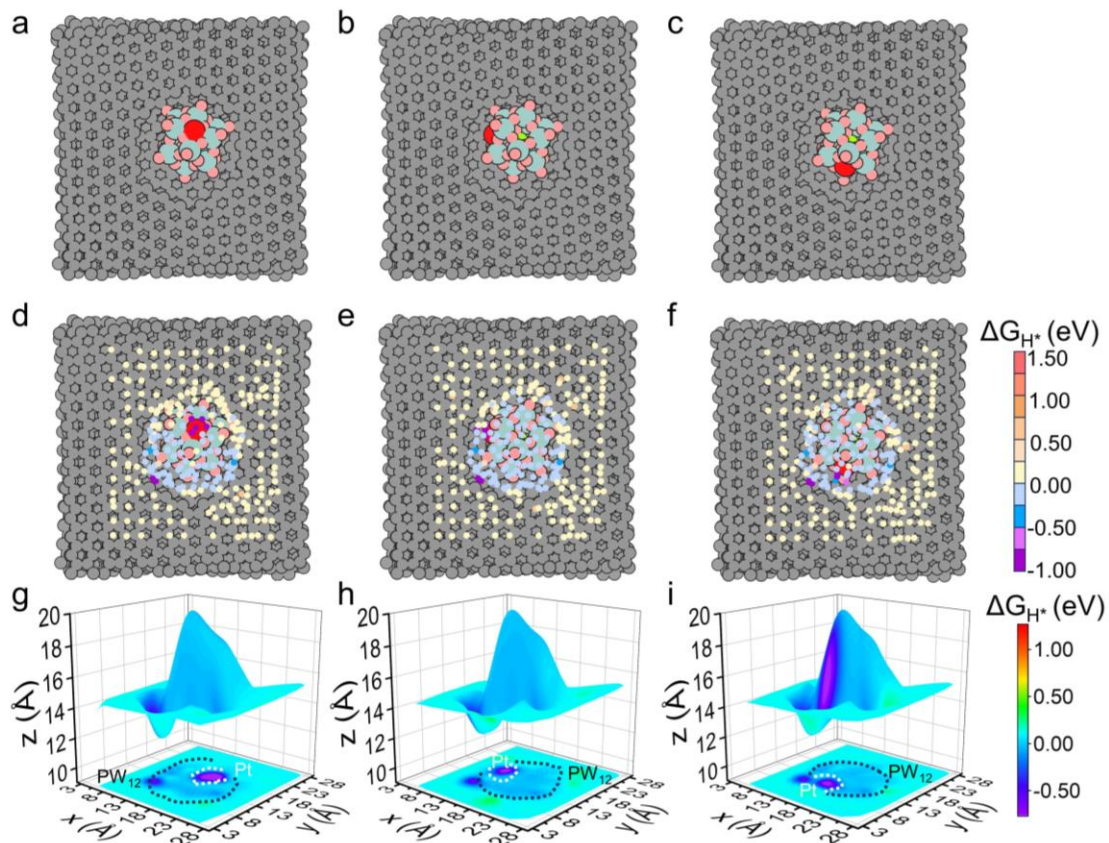

**Fig. S52.** Optimized structural models showing the top view of (a) Pt<sub>1</sub>@PW<sub>12</sub>@G-01, (b) Pt<sub>1</sub>@PW<sub>12</sub>@G-02, and (c) Pt<sub>1</sub>@PW<sub>12</sub>@G-03. H adsorption free energy maps for HER on (d) Pt<sub>1</sub>@PW<sub>12</sub>@G-01, (e) Pt<sub>1</sub>@PW<sub>12</sub>@G-02, and (f) Pt<sub>1</sub>@PW<sub>12</sub>@G-03. Corresponding 3D contour of ΔG<sub>H\*</sub> on (g) Pt<sub>1</sub>@PW<sub>12</sub>@G-01, (h) Pt<sub>1</sub>@PW<sub>12</sub>@G-02, and (i) Pt<sub>1</sub>@PW<sub>12</sub>@G-03.

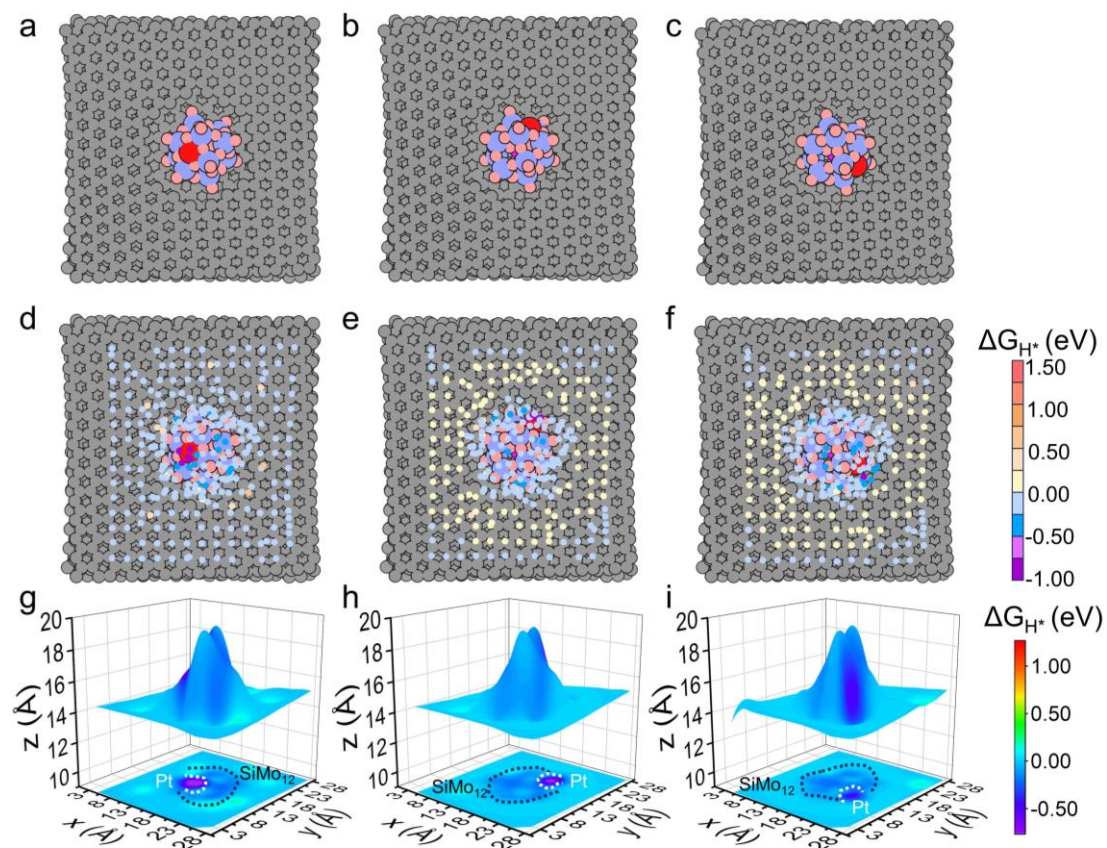

**Fig. S53.** Optimized structural models showing the top view of (a) Pt<sub>1</sub>@SiMo<sub>12</sub>@G-01, (b) Pt<sub>1</sub>@SiMo<sub>12</sub>@G-02, and (c) Pt<sub>1</sub>@SiMo<sub>12</sub>@G-03. H adsorption free energy maps for HER on (d) Pt<sub>1</sub>@SiMo<sub>12</sub>@G-01, (e) Pt<sub>1</sub>@SiMo<sub>12</sub>@G-02, and (f) Pt<sub>1</sub>@SiMo<sub>12</sub>@G-03. 3D contour of ΔG<sub>H\*</sub> on (g) Pt<sub>1</sub>@SiMo<sub>12</sub>@G-01, (h) Pt<sub>1</sub>@SiMo<sub>12</sub>@G-02, and (i) Pt<sub>1</sub>@SiMo<sub>12</sub>@G-03.



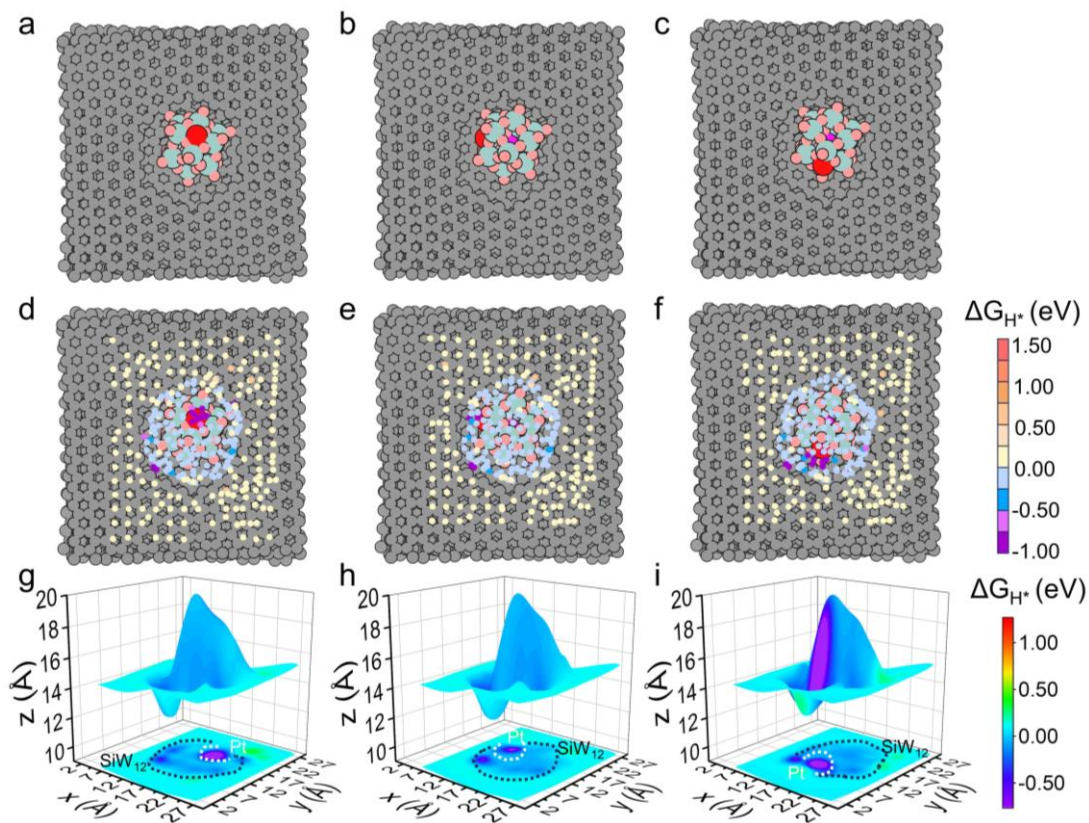

**Fig. S54.** Optimized structural models showing the top view of (a)  $\text{Pt}_1@SiW_{12}@G-01$ , (b)  $\text{Pt}_1@SiW_{12}@G-02$ , and (c)  $\text{Pt}_1@SiW_{12}@PC-03$ . H adsorption free energy maps for HER on (d)  $\text{Pt}_1@SiW_{12}@G-01$ , (e)  $\text{Pt}_1@SiW_{12}@G-02$ , and (f)  $\text{Pt}_1@SiW_{12}@G-03$ . Corresponding 3D contour of  $\Delta G_{H^*}$  on (g)  $\text{Pt}_1@SiW_{12}@G-01$ , (h)  $\text{Pt}_1@SiW_{12}@G-02$ , and (i)  $\text{Pt}_1@SiW_{12}@G-03$ .

The role of confined POMs as a buffer chain is confirmed by the larger light-blue areas (from -0.25 to 0 eV) with  $\Delta G_{H^*}$  close to 0 eV around  $\text{PMO}_{12}$  (Fig. S51),  $\text{PW}_{12}$  (Fig. S52),  $\text{SiMO}_{12}$  (Fig. S53), and  $\text{SiW}_{12}$  (Fig. S54).

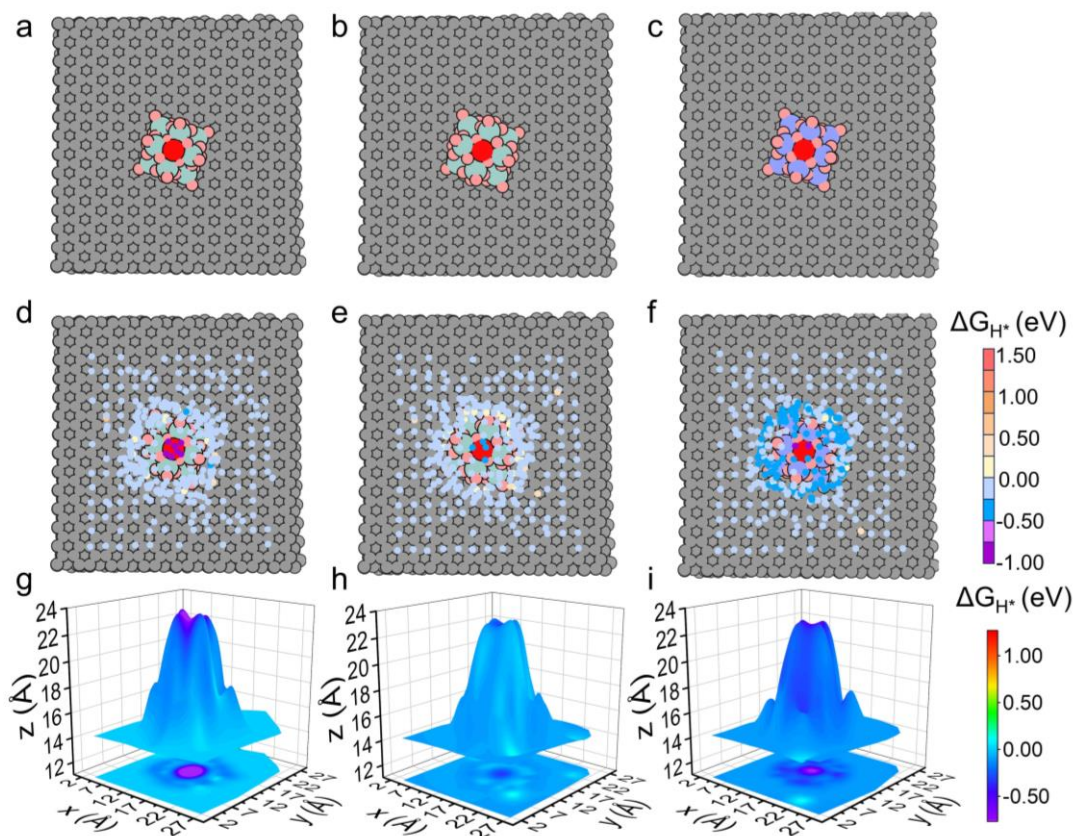

**Fig. S55.** Optimized structural models showing the top view of (a) Pt<sub>1</sub>@PW<sub>12</sub>/G, (b) Pt<sub>1</sub>@SiW<sub>12</sub>/G, and (c) Pt<sub>1</sub>@SiMo<sub>12</sub>/G. H\* adsorption free energy maps for HER on (d) Pt<sub>1</sub>@PW<sub>12</sub>/G, (e) Pt<sub>1</sub>@SiW<sub>12</sub>/G, and (f) Pt<sub>1</sub>@SiMo<sub>12</sub>/G. 3D contour of  $\Delta G_{H^*}$  on (g) Pt<sub>1</sub>@PW<sub>12</sub>/G, (h) Pt<sub>1</sub>@SiW<sub>12</sub>/G, and (i) Pt<sub>1</sub>@SiMo<sub>12</sub>/G.

Generally, Mo–H possesses a greater bonding energy compared to W–H, indicating the easier formation of Mo–H than W–H.<sup>25</sup> Compared with Pt<sub>1</sub>@PW<sub>12</sub>/G and Pt<sub>1</sub>@SiW<sub>12</sub>/G, larger dark-blue areas are shown around the PMo<sub>12</sub> and SiMo<sub>12</sub> for Pt<sub>1</sub>@SiMo<sub>12</sub>/G and Pt<sub>1</sub>@PMo<sub>12</sub>/G, implying PMo<sub>12</sub> and SiMo<sub>12</sub> are exactly unfavorable for H\* desorption due to the strong Mo–H bond (Fig. 6b and Fig. S55). In contrast, for Pt<sub>1</sub>@PMo<sub>12</sub>@G and Pt<sub>1</sub>@SiMo<sub>12</sub>@G (Fig. S51 and Fig. S53), the area around confined the PMo<sub>12</sub> and SiMo<sub>12</sub> are significantly reduced in comparison with Pt<sub>1</sub>@SiMo<sub>12</sub>/G and Pt<sub>1</sub>@PMo<sub>12</sub>/G, which illustrates that the dual-confinement system can overcome the strong H-binding with Mo, again confirming the buffer effect of confined POMs. Compared with Pt<sub>1</sub>@PW<sub>12</sub>/G and Pt<sub>1</sub>@SiW<sub>12</sub>/G, confined PW<sub>12</sub> and SiW<sub>12</sub> in Pt<sub>1</sub>@PW<sub>12</sub>@G and Pt<sub>1</sub>@SiW<sub>12</sub>@G also show similar phenomenon with smaller dark-blue area (Fig. S52 and Fig. S54).



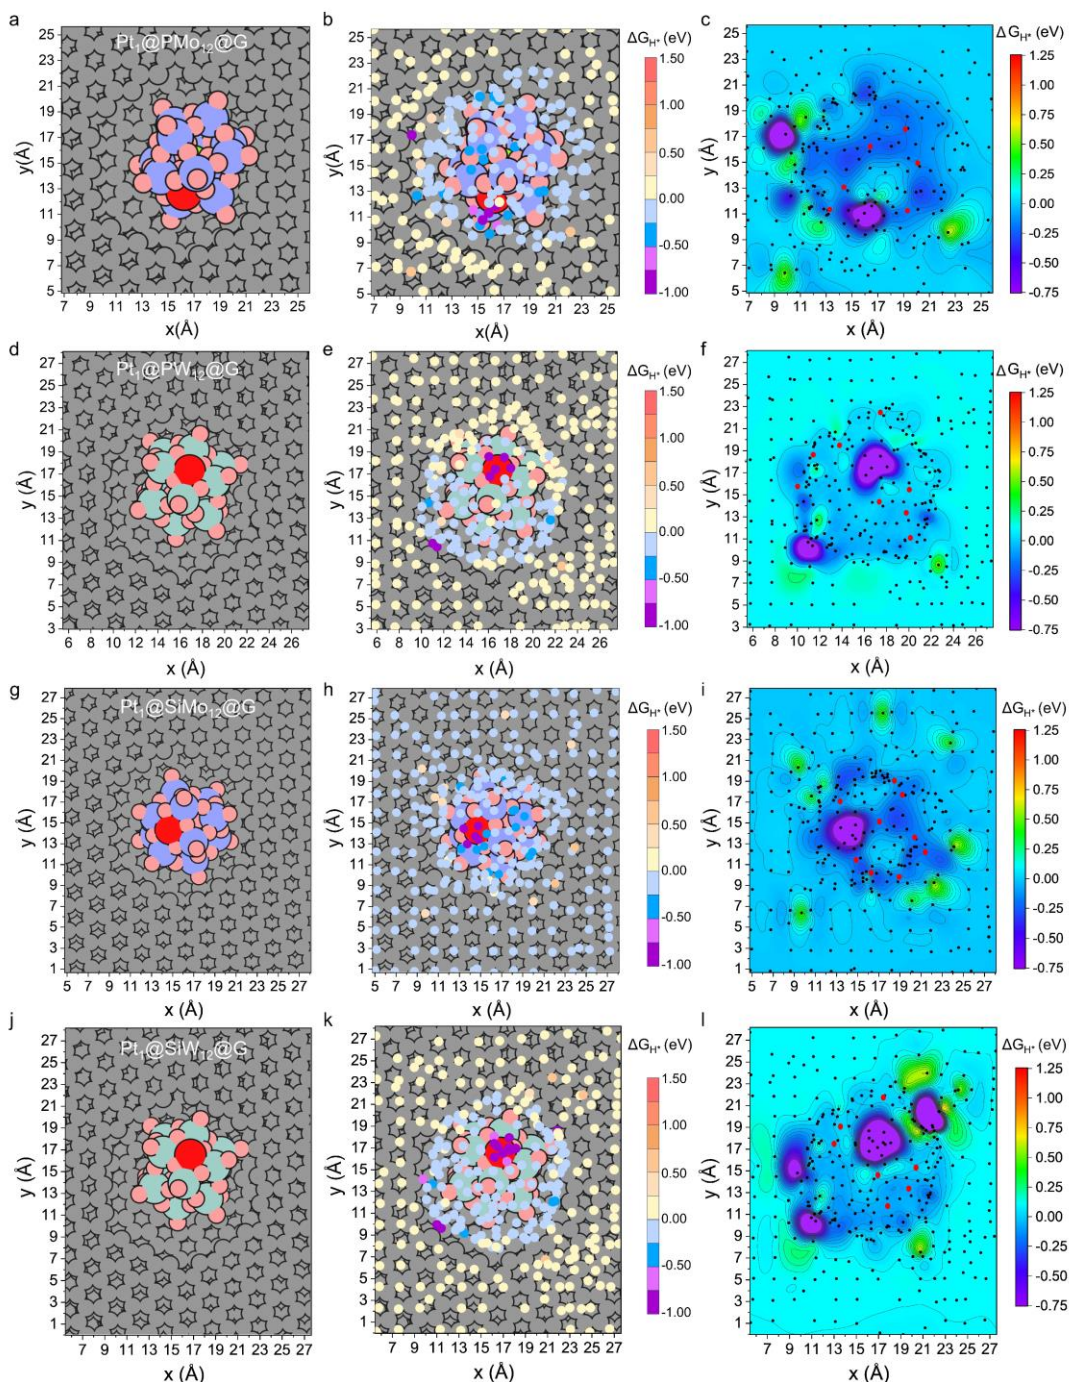

**Fig. S56.** (a, d, g, j) Optimized structural models showing the top view of Pt<sub>1</sub>@POMs@G. (b, e, h, k) H adsorption free energy maps for HER. (c, f, i, l) contour plots of PES resulting from the panel. Saddle points representing TS are marked with red dots in contour plots.

Although sub-nanopores in support occasionally show a certain H adsorption ability (purple area on supports), the absence of gradient energy barriers indicates that the adsorbed H is not easily desorbed. So, H-spillover mainly occurs through the H-buffer chain.

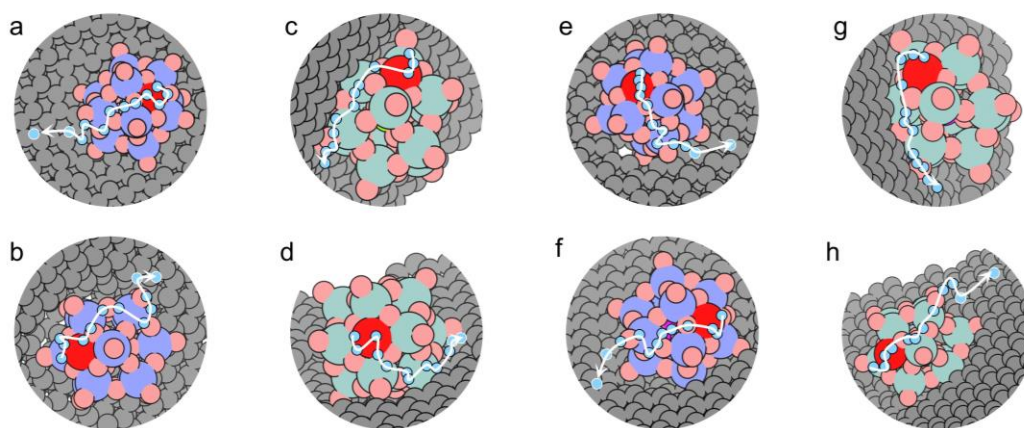

**Fig. S57.** Schematic illustration of typical hydrogen spillover paths on (a)  $\text{Pt}_1@ \text{PMo}_{12}@ \text{G-02}$ , (b)  $\text{Pt}_1@ \text{PMo}_{12}@ \text{G-03}$ , (c)  $\text{Pt}_1@ \text{PW}_{12}@ \text{G-02}$ , (d)  $\text{Pt}_1@ \text{PW}_{12}@ \text{G-03}$ , (e)  $\text{Pt}_1@ \text{SiMo}_{12}@ \text{G-02}$ , (f)  $\text{Pt}_1@ \text{SiMo}_{12}@ \text{G-03}$ , (g)  $\text{Pt}_1@ \text{SiW}_{12}@ \text{G-02}$ , and (h)  $\text{Pt}_1@ \text{SiMo}_{12}@ \text{G-03}$  for HER in acid.

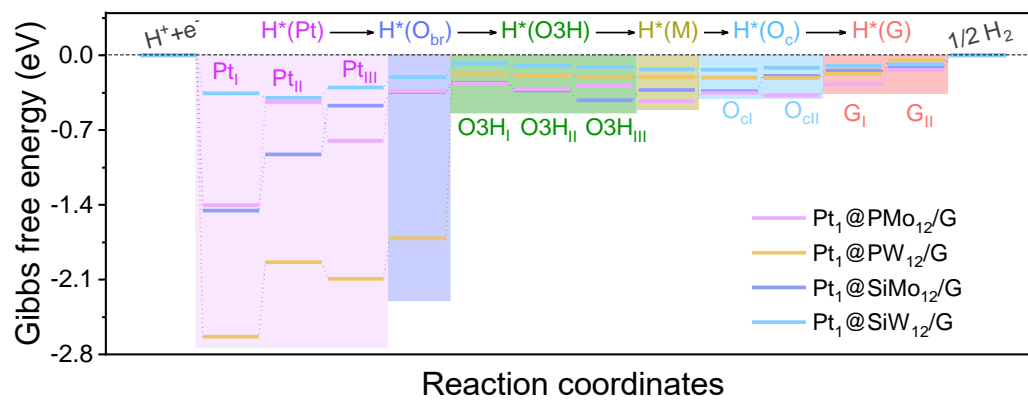

**Fig. S58.** Typical free energy diagram for HER on Pt<sub>1</sub>@POMs/G.



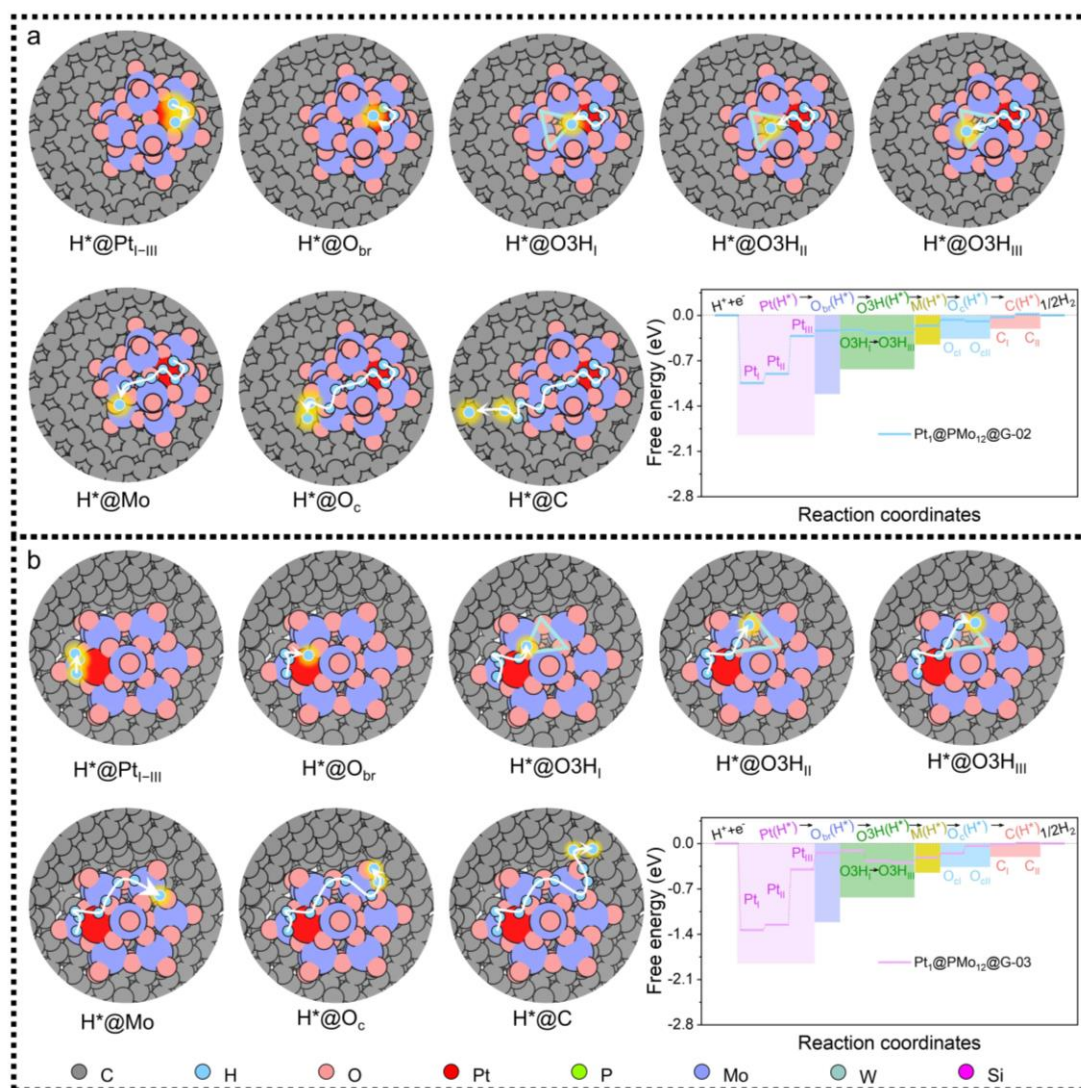

**Fig. S59.** Schematic illustration of hydrogen spillover path at atomic-scale on the (a)  $Pt_1@PMo_{12}@G-02$  and (b)  $Pt_1@PMo_{12}@G-03$ ; Inset are typical free energy diagrams for HER on (a)  $Pt_1@PMo_{12}@G-02$  and (b)  $Pt_1@PMo_{12}@G-03$ .

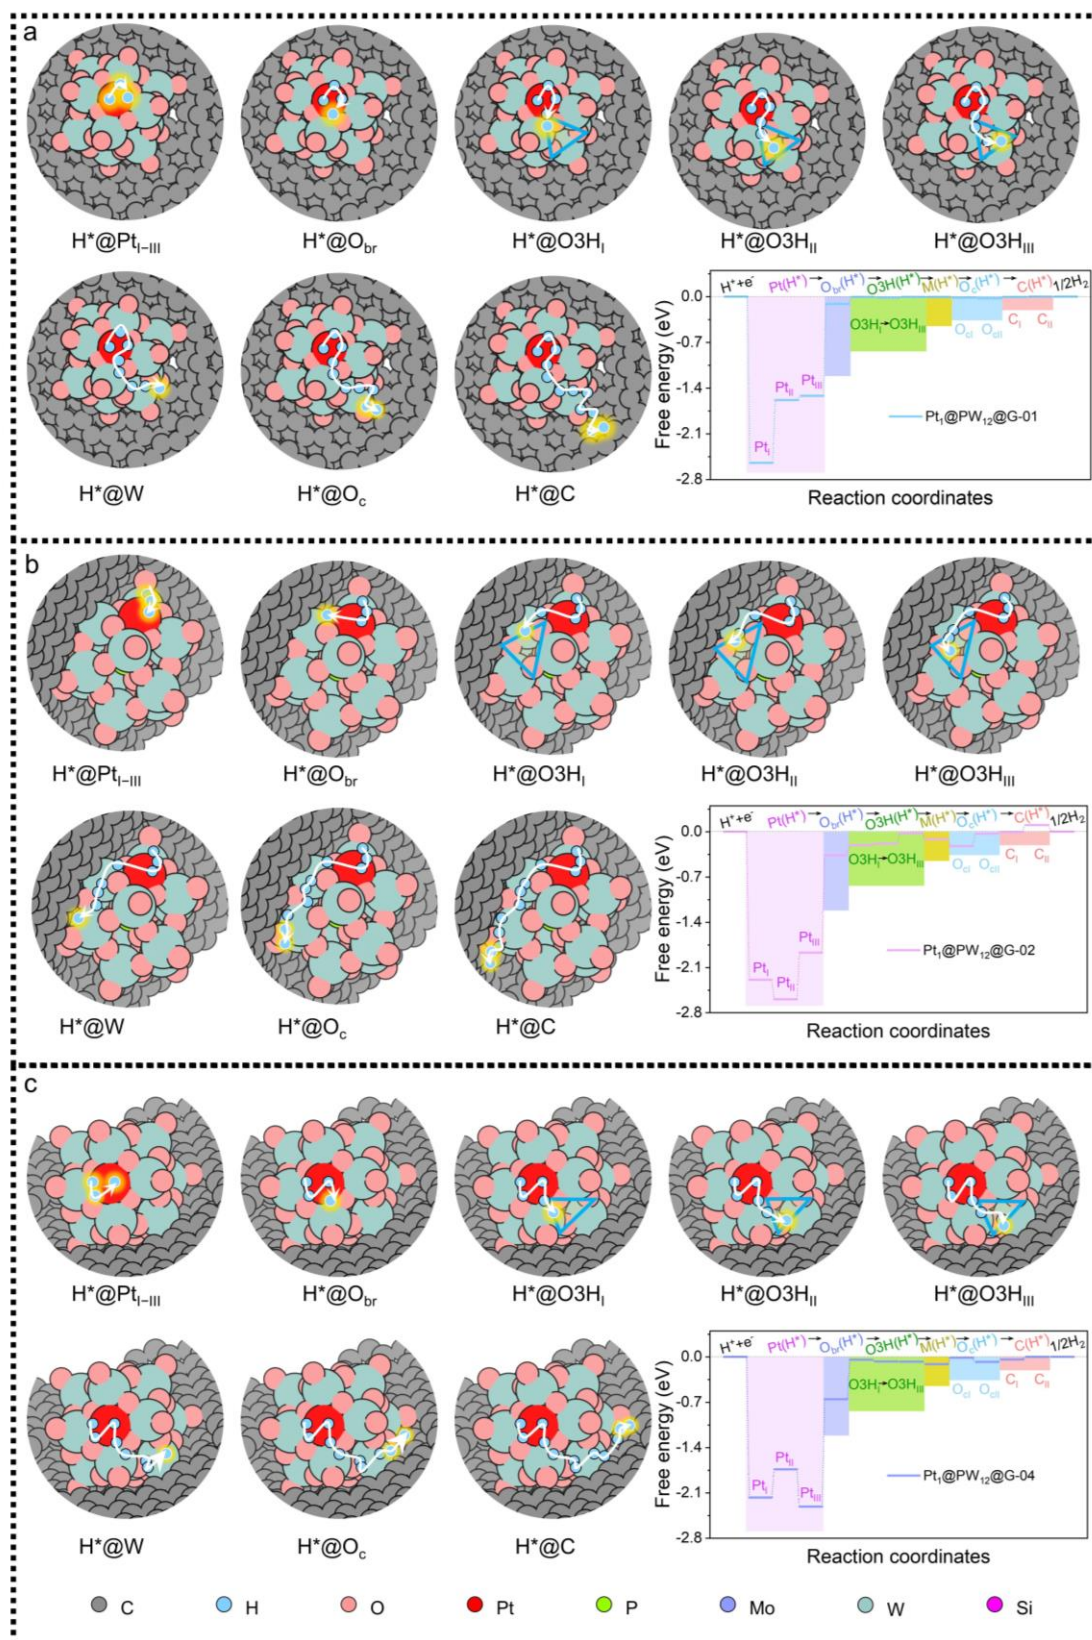

**Fig. S60.** Schematic illustration of hydrogen spillover paths at atomic-scale on the (a) Pt<sub>1</sub>@PW<sub>12</sub>@G-01, (b) Pt<sub>1</sub>@PW<sub>12</sub>@G-02, and (c) Pt<sub>1</sub>@PW<sub>12</sub>@G-03; Inset are typical free energy diagrams for HER on (a) Pt<sub>1</sub>@PW<sub>12</sub>@G-01, (b) Pt<sub>1</sub>@PW<sub>12</sub>@G-02, and (c) Pt<sub>1</sub>@PW<sub>12</sub>@G-03.



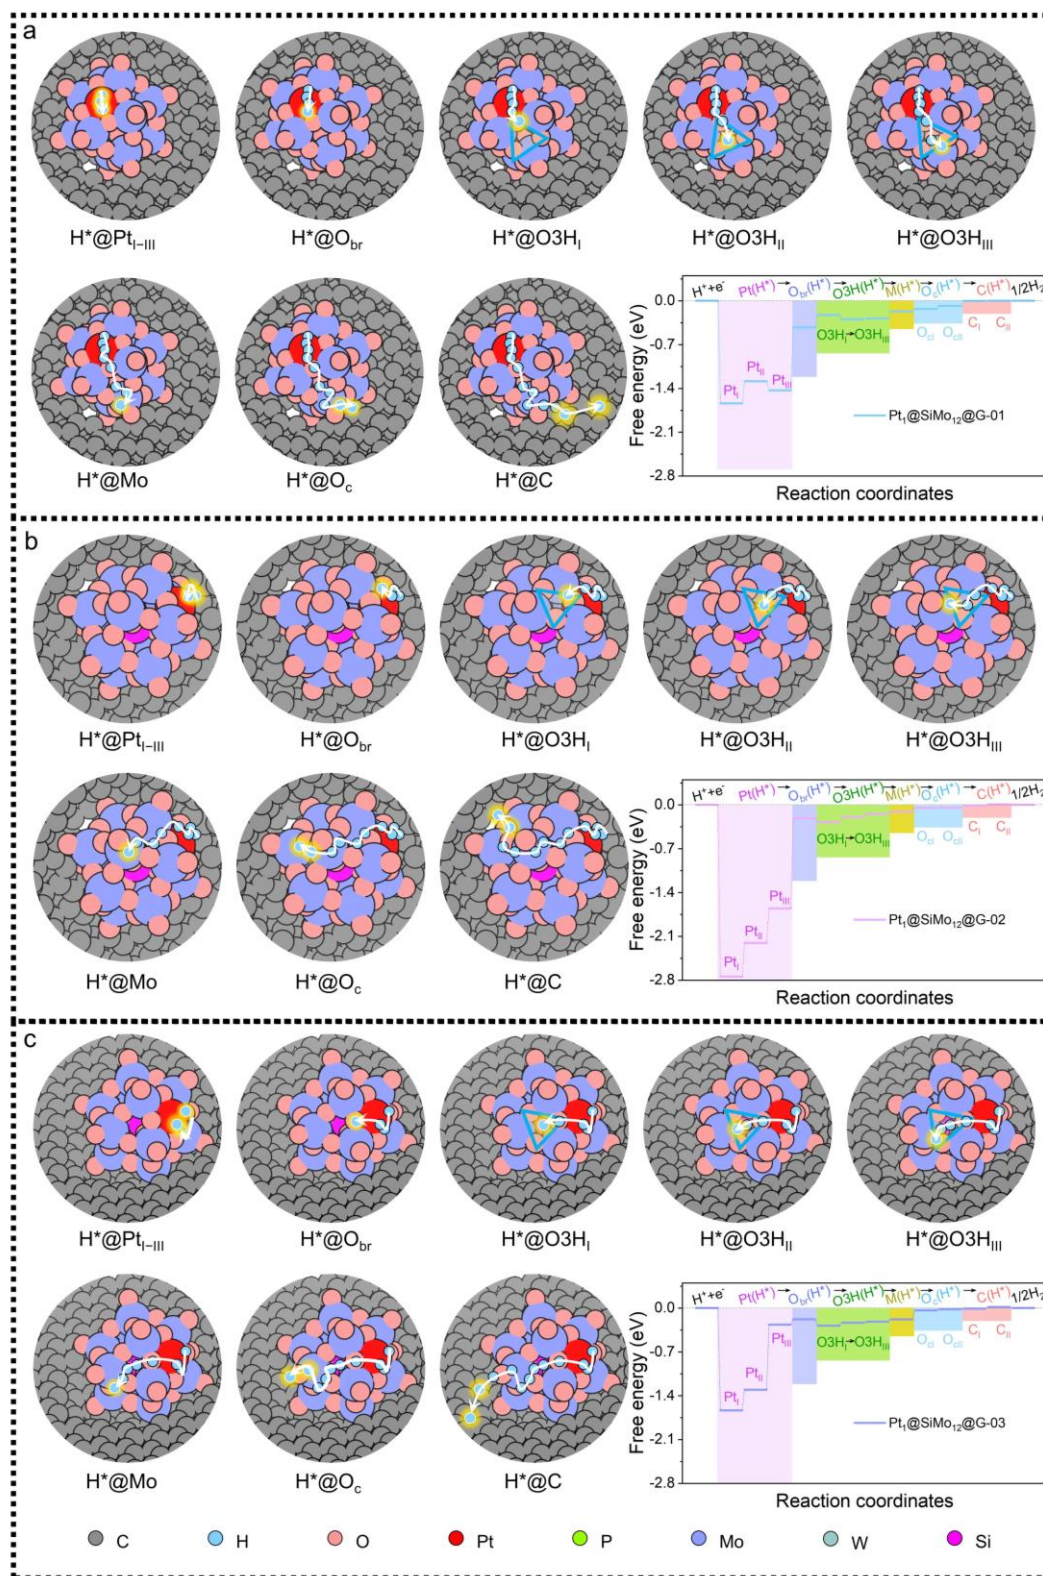

**Fig. S61.** Schematic illustration of hydrogen spillover paths at atomic-scale on the (a)  $Pt_1@SiMo_{12}@G-01$ , (b)  $Pt_1@SiMo_{12}@G-02$ , and (c)  $Pt_1@SiMo_{12}@G-03$ ; Inset are typical free energy diagrams for HER on (a)  $Pt_1@SiMo_{12}@G-01$ , (b)  $Pt_1@SiMo_{12}@G-02$ , and (c)  $Pt_1@SiMo_{12}@G-03$ .



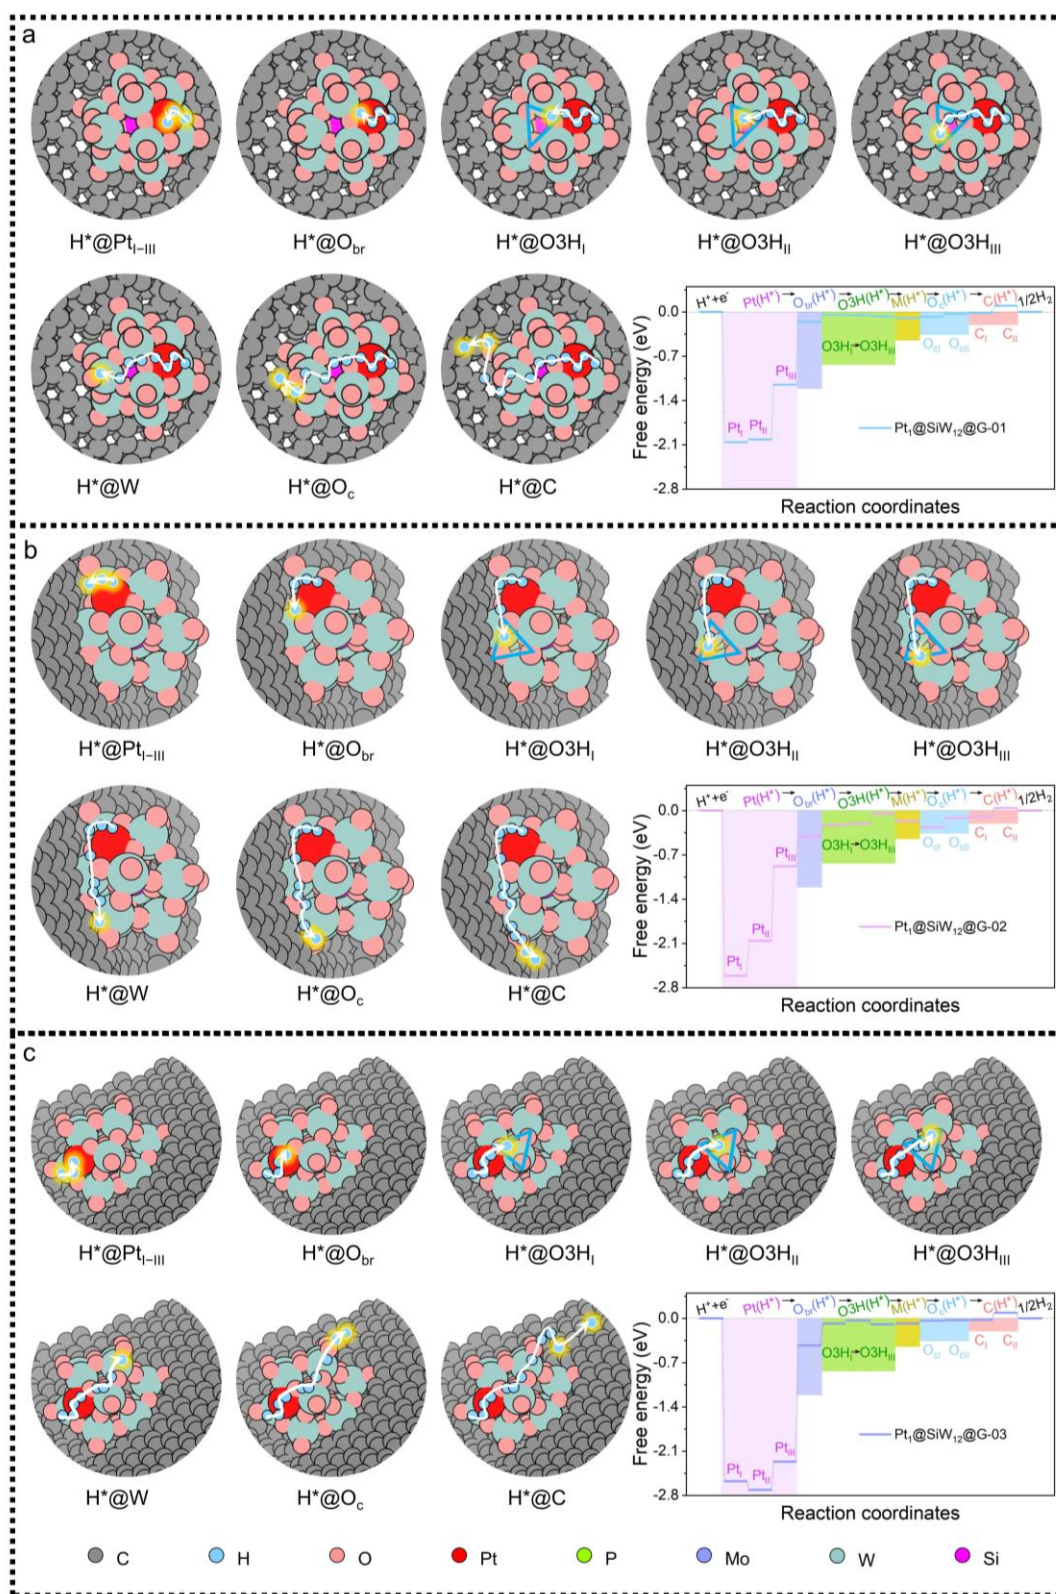

**Fig. S62.** Schematic illustration of hydrogen spillover path at atomic-scale on the (a) Pt<sub>1</sub>@SiW<sub>12</sub>@G-01, (b) Pt<sub>1</sub>@SiW<sub>12</sub>@G-02, and (c) Pt<sub>1</sub>@SiW<sub>12</sub>@G-03; Inset are typical free energy diagrams for HER on (a) Pt<sub>1</sub>@SiW<sub>12</sub>@G-01, (b) Pt<sub>1</sub>@SiW<sub>12</sub>@G-02, and (c) Pt<sub>1</sub>@SiW<sub>12</sub>@G-03.

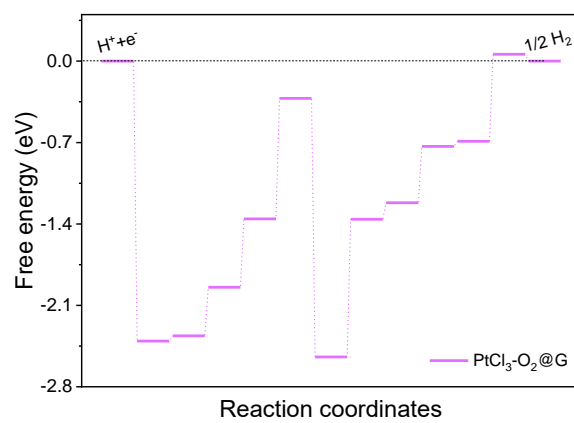

**Fig. S63.** Typical free energy diagram for HER on PtCl<sub>3</sub>-O<sub>2</sub>@G.

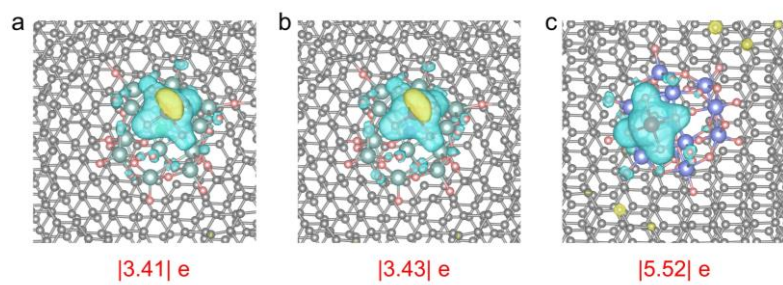

**Fig. S64.** Differential charge densities for (a)  $\text{Pt}_1@PW_{12}@G$ , (b)  $\text{Pt}_1@SiW_{12}@G$ , and (c)  $\text{Pt}_1@SiMo_{12}@G$ .

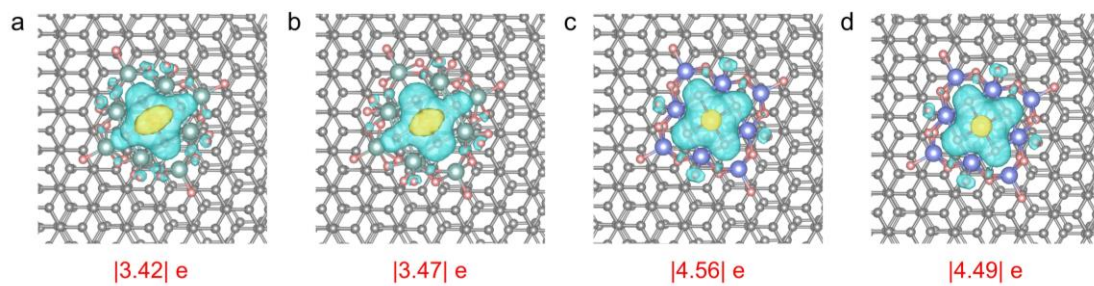

**Fig. S65.** Differential charge densities for (a) Pt<sub>1</sub>@PW<sub>12</sub>/G, (b) Pt<sub>1</sub>@SiW<sub>12</sub>/G, (c) Pt<sub>1</sub>@PMO<sub>12</sub>/G, and (d) Pt<sub>1</sub>@SiMo<sub>12</sub>/G.

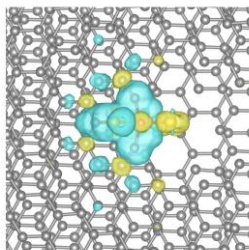

**Fig. S66.** The differential charge density for PtCl<sub>3</sub>-O<sub>2</sub>@G.

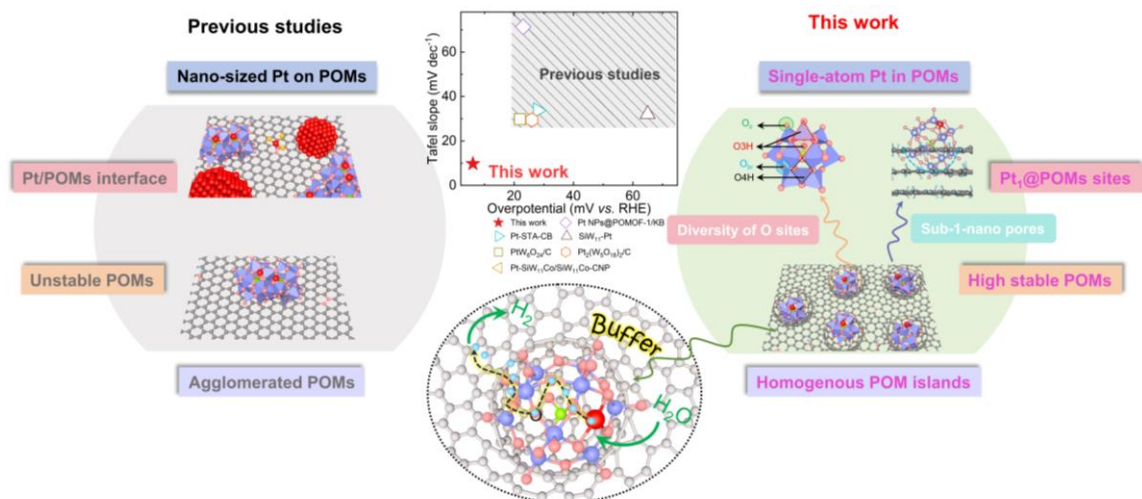

**Fig. S67.** Comparison of Pt/POMs-contained composite catalysts for HER.

(Ref: Pt NPs@POMOF-1/KB,<sup>26</sup> Pt-STA-CB,<sup>27</sup> SiW<sub>11</sub>-Pt,<sup>28</sup> PtW<sub>6</sub>O<sub>24</sub>/C,<sup>29</sup> Pt<sub>2</sub>(W<sub>5</sub>O<sub>18</sub>)<sub>2</sub>/C,<sup>14</sup> Pt-SiW<sub>11</sub>Co/SiW<sub>11</sub>Co-CNP<sup>30</sup>).



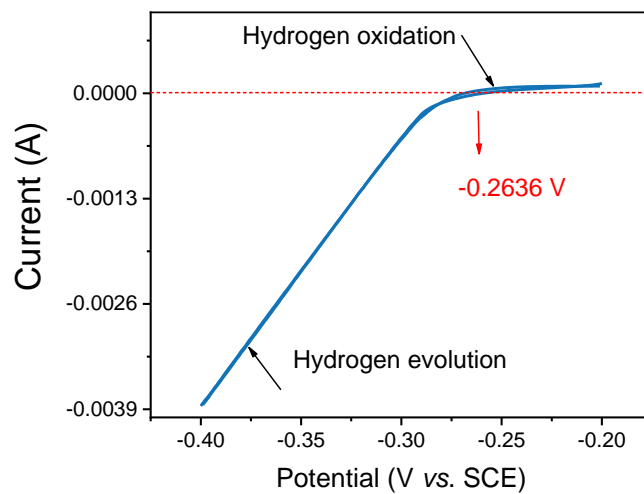

**Fig. S68.** RHE calibration of SCE reference electrode in 0.5 M H<sub>2</sub>SO<sub>4</sub>.

**Table S1.** Binding energies of Pt atom in supports.

| Label                                     | Binding energy (eV) |
|-------------------------------------------|---------------------|
| Pt <sub>1</sub> @PMo <sub>12</sub> @G-4H  | -1.46               |
| Pt <sub>1</sub> @PMo <sub>12</sub> @G-3H  | -1.63               |
| Pt <sub>1</sub> @PMo <sub>12</sub> /G     | -0.95               |
| Pt <sub>1</sub> @PW <sub>12</sub> @G-4H   | -2.6                |
| Pt <sub>1</sub> @PW <sub>12</sub> @G-3H   | 0.94                |
| Pt <sub>1</sub> @PW <sub>12</sub> /G      | -0.6                |
| Pt <sub>1</sub> @SiMo <sub>12</sub> @G-4H | -1.3                |
| Pt <sub>1</sub> @SiMo <sub>12</sub> @G-3H | 3.97                |
| Pt <sub>1</sub> @SiMo <sub>12</sub> /G    | -0.9                |
| Pt <sub>1</sub> @SiW <sub>12</sub> @PC-4H | -1.47               |
| Pt <sub>1</sub> @SiW <sub>12</sub> @PC-3H | 9.32                |
| Pt <sub>1</sub> @SiW <sub>12</sub> /G     | -1.2                |
| Pt <sub>1</sub> @G(O/POMs)                | -0.78               |
| Pt <sub>1</sub> @G(O)                     | -0.6                |
| PtCl <sub>3</sub> -O <sub>2</sub> @G      | -2.74               |

**Table S2.** The geometry parameters of POMs and Pt atoms confined in O4H sites of POMs@G and POMs/G.

| Label                                     | Pt–O bond length (Å) <sup>a</sup> | Dihedral angle (°) <sup>a</sup> |
|-------------------------------------------|-----------------------------------|---------------------------------|
| PMo <sub>12</sub>                         | -                                 | 16.715                          |
| Pt <sub>1</sub> @PMo <sub>12</sub> @G-01  | 1.946, 1.964, 1.692, 1.704        | 0.1776                          |
| Pt <sub>1</sub> @PMo <sub>12</sub> @G-02  | 1.976, 1.861, 1.734, 1.792        | 0.0523                          |
| Pt <sub>1</sub> @PMo <sub>12</sub> @G-03  | 1.798, 1.843, 1.808, 1.839        | 0.6851                          |
| Pt <sub>1</sub> @PMo <sub>12</sub> /G     | 1.812, 1.809, 1.829, 1.833        | 0.1111                          |
| SiMo <sub>12</sub>                        | -                                 | 21.4450                         |
| Pt <sub>1</sub> @SiMo <sub>12</sub> @G-01 | 1.882, 1.841, 1.800, 1.795        | 0.1004                          |
| Pt <sub>1</sub> @SiMo <sub>12</sub> @G-02 | 2.077, 1.857, 1.809, 1.575,       | 1.2267                          |
| Pt <sub>1</sub> @SiMo <sub>12</sub> @G-03 | 1.863, 1.863, 1.835, 1.781,       | 0.4576                          |
| Pt <sub>1</sub> @SiMo <sub>12</sub> /G    | 1.812, 1.830, 1.852, 1.835        | 0.0892                          |
| PW <sub>12</sub>                          | -                                 | 16.8300                         |
| Pt <sub>1</sub> @PW <sub>12</sub> @G-01   | 1.972, 2.045, 1.650, 1.657        | 15.7900                         |
| Pt <sub>1</sub> @PW <sub>12</sub> @G-02   | 2.106, 1.950, 1.777, 1.552        | 17.5800                         |
| Pt <sub>1</sub> @PW <sub>12</sub> @G-03   | 2.060, 1.946, 1.639, 1.706,       | 15.9586                         |
| Pt <sub>1</sub> @PW <sub>12</sub> /G      | 2.064, 1.999, 1.654, 1.702,       | 16.5803                         |
| SiW <sub>12</sub>                         | -                                 | 19.6000                         |
| Pt <sub>1</sub> @SiW <sub>12</sub> @PC-01 | 2.136, 1.969, 1.672, 1.669        | 18.8202                         |
| Pt <sub>1</sub> @SiW <sub>12</sub> @PC-02 | 1.978, 2.098, 1.538, 1.726        | 18.7992                         |
| Pt <sub>1</sub> @SiW <sub>12</sub> @PC-03 | 2.191, 2.658, 1.616, 1.640,       | 20.1720                         |
| Pt <sub>1</sub> @SiW <sub>12</sub> @G     | 2.169, 2.200, 1.585, 1.629,       | 22.6756                         |

<sup>a</sup> Note that for Mo-based POMs (PMo<sub>12</sub> and SiMo<sub>12</sub>), the length of the four Pt–O bonds is approximate and four oxygens of O4H site tend to be in one plane, suggesting that the introduction of Pt has a great influence on the configuration of PMo<sub>12</sub> and SiMo<sub>12</sub>, as confirmed by the significantly reduced dihedral angle. For W-based POMs, two Pt–O bonds are longer and two Pt–O bonds are shorter, as demonstrated by the dihedral angle showing non-obvious change. This may be attributed to the difference in atomic structure between Mo and W.

**Table S3.** EXAFS curve fitting parameters at the Pt L3-edge for various samples.

| Catalyst                                  | Shell | CN <sup>a</sup> | R(Å) <sup>b</sup> | σ <sup>2</sup> (Å <sup>2</sup> ) <sup>c</sup> | ΔE <sub>0</sub> (eV) <sup>d</sup> | R factor |
|-------------------------------------------|-------|-----------------|-------------------|-----------------------------------------------|-----------------------------------|----------|
| <b>Pt-foil</b>                            | Pt–Pt | 12*             | 2.765±0.003       | 0.0041±0.0004                                 | 7.8±0.5                           | 0.0072   |
| <b>PtO<sub>2</sub></b>                    | Pt–O  | 5.2±0.4         | 2.011±0.001       | 0.0026±0.0008                                 | 9.5±0.5                           | 0.0099   |
|                                           | Pt–Pt | 3.2±0.7         | 3.078±0.001       |                                               | 5.6±1.6                           |          |
|                                           | Pt–O  | 11.6±2.2        | 4.043±0.001       |                                               | -1.7±1.0                          |          |
| <b>Pt<sub>1</sub>@PMo<sub>12</sub>@PC</b> | Pt–O  | 4.3±0.5         | 1.987±0.001       | 0.0007±0.0015                                 | 9.9±0.9                           | 0.0093   |
| <b>Pt<sub>1</sub>@PC</b>                  | Pt–O  | 1.6±0.2         | 2.058±0.001       | 0.0029±0.0015                                 | 7.4±0.4                           | 0.0080   |
|                                           | Pt–Cl | 2.9±0.4         | 2.332±0.001       |                                               |                                   |          |

<sup>a</sup>CN, coordination number; <sup>b</sup>R, the distance to the neighboring atom; <sup>c</sup>σ<sup>2</sup>, the Mean Square Relative Displacement (MSRD); <sup>d</sup>ΔE<sub>0</sub>, inner potential correction; R factor indicates the goodness of the fit. S<sub>0</sub><sup>2</sup> was fixed to 0.756 and 0.938, according to the experimental EXAFS fit of Pt foil and Mo foil by fixing CN as the known crystallographic value. \* This value was fixed during EXAFS fitting, based on the known structure. Fitting range: 2.1 ≤ k (1/Å) ≤ 12.0 and 1.3 ≤ R (Å) ≤ 3.2 (Pt foil); 3.0 ≤ k (1/Å) ≤ 12.0 and 1.3 ≤ R (Å) ≤ 3.6 (PtO<sub>2</sub>); 2.1 ≤ k (1/Å) ≤ 12.0 and 1.2 ≤ R (Å) ≤ 2.0 (Pt<sub>1</sub>@PMo<sub>12</sub>@PC); 2.1 ≤ k (1/Å) ≤ 12.0 and 1.2 ≤ R (Å) ≤ 2.5 (Pt<sub>1</sub>@PC); 2.5 ≤ k (1/Å) ≤ 12.0 and 1.0 ≤ R (Å) ≤ 3.4 (Mo foil); 3.0 ≤ k (1/Å) ≤ 12.0 and 0.7 ≤ R (Å) ≤ 4.0 (MoO<sub>3</sub>); 2.5 ≤ k (1/Å) ≤ 11.5 and 0.6 ≤ R (Å) ≤ 2.0 (Pt<sub>1</sub>@PMo<sub>12</sub>@PC). A reasonable range of EXAFS fitting parameters: 0.700 < S<sub>0</sub><sup>2</sup> < 1.000; CN > 0; σ<sup>2</sup> > 0 Å<sup>2</sup>; |ΔE<sub>0</sub>| < 15 eV; R factor < 0.02.

**Table S4.** EXAFS curve fitting parameters at the Mo *K*-edge for various samples.

| Catalyst                                  | Shell | CN <sup>a</sup> | R(Å) <sup>b</sup> | σ <sup>2</sup> (Å <sup>2</sup> ) <sup>c</sup> | ΔE <sub>0</sub> (eV) <sup>d</sup> | R factor |
|-------------------------------------------|-------|-----------------|-------------------|-----------------------------------------------|-----------------------------------|----------|
| <b>Mo foil</b>                            | Mo–Mo | 8*              | 2.717±0.005       | 0.0038±0.0008                                 | 4.7±0.8                           | 0.0057   |
|                                           | Mo–Mo | 6*              | 3.135±0.009       | 0.0033±0.0010                                 | 5.6±1.4                           |          |
| <b>MoO<sub>3</sub></b>                    | Mo–O  | 4.3±0.2         | 1.717±0.001       | 0.0074±0.0013                                 | 6.9±1.5                           | 0.0159   |
|                                           | Mo–O  | 6.3±0.5         | 1.961±0.001       |                                               |                                   |          |
|                                           | Mo–O  | 3.6±0.5         | 2.246±0.001       |                                               |                                   |          |
|                                           | Mo–Mo | 9.2±0.7         | 3.670±0.001       | 0.0085±0.0021                                 | -5.5±0.8                          |          |
|                                           | Mo–Mo | 2.1±0.3         | 4.036±0.001       | 0.0019±0.0041                                 | 8.3±1.8                           |          |
| <b>Pt<sub>1</sub>@PMo<sub>12</sub>@PC</b> | Mo–O  | 4.2±0.5         | 1.689±0.001       | 0.0085±0.0019                                 | -3.2±1.7                          | 0.0097   |
|                                           | Mo–O  | 1.0±0.5         | 1.900±0.001       |                                               |                                   |          |

**Table S5.** The  $C_{dl}$  and ECSA values of all samples.

| Samples                                 | $C_{dl}$ (mF cm <sup>-2</sup> ) | ECSA   |
|-----------------------------------------|---------------------------------|--------|
| Pt <sub>1</sub> @PW <sub>12</sub> @PC   | 10.67                           | 177.8  |
| Pt-PW <sub>12</sub> /AC                 | 0.683                           | 11.38  |
| Pt <sub>1</sub> @PMo <sub>12</sub> @PC  | 10.2                            | 170    |
| Pt-PMo <sub>12</sub> /AC                | 1.59                            | 25.5   |
| Pt <sub>1</sub> @SiW <sub>12</sub> @PC  | 7.98                            | 133    |
| Pt-SiW <sub>12</sub> /AC                | 0.658                           | 10.97  |
| Pt <sub>1</sub> @SiMo <sub>12</sub> @PC | 13.9                            | 231.67 |
| Pt-SiMo <sub>12</sub> /AC               | 0.383                           | 6.38   |
| 20% Pt/C                                | 9.77                            | 162.83 |
| Pt <sub>1</sub> @PC                     | 7.53                            | 125.5  |
| PC                                      | 1.82                            | 30.333 |



**Tabel S6.** Exchange current densities extracted for HER in 0.5 M H<sub>2</sub>SO<sub>4</sub>

| <b>Materials</b>                           | <b>Log(j<sub>0</sub>/ A cm<sup>-2</sup>), 25°C</b> | <b>j<sub>0</sub>(A cm<sup>-2</sup>), 25°C</b> |
|--------------------------------------------|----------------------------------------------------|-----------------------------------------------|
| <b>Pt<sub>1</sub>@PMo<sub>12</sub>@PC</b>  | -2.49                                              | 0.0032                                        |
| <b>Pt<sub>1</sub>@PW<sub>12</sub>@PC</b>   | -2.28                                              | 0.0052                                        |
| <b>Pt<sub>1</sub>@SiMo<sub>12</sub>@PC</b> | -2.39                                              | 0.0040                                        |
| <b>Pt<sub>1</sub>@SiW<sub>12</sub>@PC</b>  | -2.48                                              | 0.0033                                        |
| <b>Pt-PMo<sub>12</sub>/AC</b>              | -2.94                                              | 0.0011                                        |
| <b>Pt-PW<sub>12</sub>/AC</b>               | -2.59                                              | 0.0025                                        |
| <b>Pt-SiMo<sub>12</sub>/AC</b>             | -2.58                                              | 0.0026                                        |
| <b>Pt-SiW<sub>12</sub>/AC</b>              | -2.54                                              | 0.0028                                        |
| <b>Pt<sub>1</sub>@PC</b>                   | -2.50                                              | 0.0031                                        |

**Table S7.** The HER activities of Pt<sub>1</sub>@POMs@PC compared with other recently reported Pt single atom catalysts in 0.5 M H<sub>2</sub>SO<sub>4</sub>.

| Samples                                                 | Tafel slopes (mV dec <sup>-1</sup> ) | $\eta_{10}$ (mV) | Mass loading (mg cm <sup>-2</sup> ) | Mass activity (A mg <sub>Pt</sub> <sup>-1</sup> ) | TOF (s <sup>-1</sup> )                     | Ref       |
|---------------------------------------------------------|--------------------------------------|------------------|-------------------------------------|---------------------------------------------------|--------------------------------------------|-----------|
| Pt <sub>1</sub> @PMo <sub>12</sub> @PC                  | 14.8                                 | 8.30             | 0.132                               | 3.68, 10 mV<br>18.8, 30 mV<br>37.78, 50 mV        | 3.72, 10 mV<br>19.3, 10 mV<br>39.0, 50 mV  | This work |
| Pt <sub>1</sub> @PW <sub>12</sub> @PC                   | 15.4                                 | 3.76             | 0.132                               | 5.61, 10 mV<br>25.21, 30 mV<br>44.01, 50 mV       | 5.65, 10 mV<br>25.6, 30 mV<br>44.23, 50 mV | This work |
| Pt <sub>1</sub> @SiMo <sub>12</sub> @PC                 | 9.76                                 | 6.12             | 0.132                               | 2.85, 10 mV<br>17.23, 30 mV<br>25.85, 50 mV       | 3.07, 10 mV<br>18.3, 30 mV<br>25.6, 50 mV  | This work |
| Pt <sub>1</sub> @SiW <sub>12</sub> @PC                  | 18.5                                 | 6.8              | 0.132                               | 2.45, 10 mV<br>10.17, 30 mV<br>19.66, 50 mV       | 2.66, 10 mV<br>10.6, 30 mV<br>20.17, 50 mV | This work |
| PtSA-MIL100/Fe                                          | 28.87                                | 60               | 0.2                                 | -                                                 | -                                          | 31        |
| Bpy-CP-900@Pt                                           | 29.0                                 | 54               | 0.2538                              | 1.24, 50 mV                                       | -                                          | 32        |
| Pt <sub>1+Cs</sub> -NPC                                 | 12.5                                 | 24               | 0.198                               | 4.59, 30 mV                                       | 16.94, 50 mV                               | 33        |
| Pt-MoAl <sub>1-x</sub> B                                | 78.8                                 | 18               | 3.0                                 | 4.0, 100 mV                                       | 0.68, 100 mV                               | 34        |
| Pt-SA/pCNFs                                             | 24                                   | 21               | 0.40                                | 14.5, 50 mV                                       | 14.8, 50 mV                                | 35        |
| PtSA/CoAC-O@ACTP                                        | 43                                   | 61               | 0.3                                 | 64.0, 100 mV                                      | -                                          | 36        |
| Ti <sub>3</sub> C <sub>2</sub> T <sub>x</sub> @PtSA     | 45                                   | 38               | 0.283                               | 23.2, 100 mV                                      | 23.4, 50 mV                                | 23        |
| Pt/MoS <sub>2</sub>                                     | 27                                   | 38               | 0.71                                | -                                                 | 19.8, 100 mV                               | 37        |
| Pt/MoS <sub>2</sub> -NTA/Ti <sub>3</sub> C <sub>2</sub> | 35                                   | 32               | -                                   | 46.5, 100 mV                                      | 47.0, 100 mV                               | 38        |
| Pt-CNTs                                                 | 48.57                                | 41               | 0.336                               | -                                                 | -                                          | 39        |
| O@Pt on Au NDs                                          | 31                                   | 18               | 0.0038                              | -                                                 | 40.1, 50 mV                                | 40        |
| PtW NPs/C                                               | 27.8                                 | 19.4             | -                                   | -                                                 | -                                          | 41        |
| Pt-GDY <sub>2</sub>                                     | 46.6                                 | 23.64            | 0.48                                | -                                                 | -                                          | 42        |
| PtPVP/TNR@GC                                            | 27                                   | 21               | 1.25                                | 16.53, 50 mV                                      | -                                          | 43        |
| AC Pt-NG/C                                              | 27                                   | 35.28            | -                                   | 12.62, 50 mV                                      | 0.093, 50 mV                               | 44        |
| Pt/WO <sub>3</sub> @CFC                                 | 73                                   | 42               | 0.255                               | 0.321, 20 mV                                      | -                                          | 45        |
| Pt SASs/AG                                              | 29.33                                | 12               | -                                   | 11.8, 30 mV                                       | -                                          | 46        |
| A/C@P@PtTe <sub>2</sub>                                 | 37                                   | 28               | -                                   | -                                                 | 2.45, 150 mV                               | 47        |
| Pt <sub>1</sub> /NMHCS                                  | 56                                   | 40               | 0.412                               | 2.07, 50 mV                                       | 4.47, 100 mV                               | 48        |
| Pt <sub>doped</sub> @WC <sub>x</sub>                    | 20                                   | 4                | -                                   | 14.3, 100 mV                                      | 14.1, 100 mV                               | 13        |
| Pt SA/WO <sub>3-x</sub>                                 | 45                                   | 38               | 0.196                               | 12.8, 50 mV                                       | 35.0, 100 mV                               | 49        |
| K <sub>2</sub> PtCl <sub>4</sub> @NC-M                  | 21                                   | 11               | 0.294                               | 5.6, 20 mV                                        | 6.1, 100 mV                                | 50        |
| Pt <sub>61</sub> La <sub>39</sub> @KB                   | 29                                   | 21               | 0.142                               | 5.39, 70 mV                                       | 8.73, 70 mV                                | 51        |

**Table S8.** The HER activities of recently reported catalysts with hydrogen spillover effect.

| Samples                                                              | Electrolyte                          | Tafel slopes<br>(mV dec <sup>-1</sup> ) | $\eta$ (mV)                 | Ref |
|----------------------------------------------------------------------|--------------------------------------|-----------------------------------------|-----------------------------|-----|
| Ru-WO <sub>3-x</sub> /CP                                             | 1.0 M PBS                            | 41                                      | 19, 10 mA·cm <sup>-2</sup>  | 22  |
| PtIr/CoP                                                             | 0.5 M H <sub>2</sub> SO <sub>4</sub> | 25.2                                    | 7, 20 mA·cm <sup>-2</sup>   | 14  |
| La <sub>2</sub> Sr <sub>2</sub> PtO <sub>7+<math>\delta</math></sub> | 0.5 M H <sub>2</sub> SO <sub>4</sub> | 22                                      | 13, 10 mA·cm <sup>-2</sup>  | 19  |
| PtNiP NWs                                                            | 1 M KOH                              | 39.2                                    | 24, 10 mA·cm <sup>-2</sup>  | 52  |
| Ru <sub>1</sub> Fe <sub>1</sub> /CoP                                 | 0.5 M H <sub>2</sub> SO <sub>4</sub> | 24.5                                    | 6, 20mA·cm <sup>-2</sup>    | 53  |
| PtCu/WO <sub>3</sub> @CF                                             | 0.5 M H <sub>2</sub> SO <sub>4</sub> | 45.9                                    | 41, 10 mA·cm <sup>-2</sup>  | 54  |
| Pt/RuCeO <sub>x</sub> @PA                                            | 0.5 M H <sub>2</sub> SO <sub>4</sub> | 31                                      | 41, 10 mA·cm <sup>-2</sup>  | 55  |
| MoS <sub>2</sub> /NiPS <sub>3</sub>                                  | 1 M KOH                              | 64                                      | 112, 10 mA·cm <sup>-2</sup> | 56  |
| OH-Ni/Ni <sub>3</sub> C                                              | 1 M KOH                              | 106.3                                   | 72, 10 mA·cm <sup>-2</sup>  | 57  |
| Pt-CoP                                                               | 0.5 M H <sub>2</sub> SO <sub>4</sub> | 28.2                                    | 53, 10 mA·cm <sup>-2</sup>  | 58  |
| IrGe                                                                 | 0.5 M H <sub>2</sub> SO <sub>4</sub> | 27.8                                    | 12, 10 mA·cm <sup>-2</sup>  | 59  |
| Ru/NCDs                                                              | 0.5 M H <sub>2</sub> SO <sub>4</sub> | 25                                      | 12, 10 mA·cm <sup>-2</sup>  | 60  |

**Table S9.** Comparison of Pt/POMs-contained composite catalysts for HER.

| Catalysts                                                                | Synthesis                                                  | Interaction between POM and supporting | Pt states     | Pt (wt%) | Mass activity @30 mV ( $A\ mg_{Pt}^{-1}$ ) | Tafel slopes ( $mV\ dec^{-1}$ ) | $\eta_{10}$ (mV) | Ref.      |
|--------------------------------------------------------------------------|------------------------------------------------------------|----------------------------------------|---------------|----------|--------------------------------------------|---------------------------------|------------------|-----------|
| Pt NPs@POMOF-1/KB                                                        | Adsorption and light-reduction method                      | Coordination interaction               | Nanoparticles | 0.43     | 2.68                                       | 71.29                           | 23               | 26        |
| Pt-SiW <sub>11</sub> Co/SiW <sub>11</sub> Co-CNP                         | Hydrothermal method-anodic dissolution-cathodic deposition | With no supports (deposition)          | Composite     | -        | -                                          | 61                              | 150              | 30        |
| Pt-STA-CB                                                                | Hydrothermal method-heated-reduction                       | Loading                                | Clusters      | 1.2      | 1.32                                       | 33.8                            | 27.9             | 27        |
| SiW <sub>11</sub> -Pt                                                    | Electrochemical deposition                                 | With no supports (deposition)          | Composite     | -        | -                                          | 32                              | 65               | 28        |
| [TTMAP/Ti <sub>12</sub> P <sub>8</sub> W <sub>60</sub> @Pt] <sub>n</sub> | Photochemical reduction followed self-assembly             | With no support (film)                 | Nanoparticles | 1.97     | -                                          | -                               | -                | 61        |
| [TTMAP/Zn <sub>4</sub> P <sub>4</sub> W <sub>30</sub> @Pt] <sub>n</sub>  |                                                            |                                        |               | 8.5      |                                            |                                 |                  |           |
| PtW <sub>6</sub> O <sub>24</sub> /C                                      | Cation exchange method                                     | Loading                                | Compound      | 1        | 3.68                                       | 29.8                            | 22               | 29        |
| Pt <sub>2</sub> (W <sub>5</sub> O <sub>18</sub> ) <sub>2</sub> /C        | Cation exchange method                                     | Loading                                | Compound      | 1        | 2.004                                      | 29.5                            | 26               | 14        |
| Pt <sub>1</sub> @PMo <sub>12</sub> @PC                                   | Dual-confinement impregnation                              | Confining                              | Single-atom   | 2.15     | 18.8                                       | 14.8                            | 8.3              | This work |
| Pt <sub>1</sub> @PW <sub>12</sub> @PC                                    | Dual-confinement impregnation                              | Confining                              | Single-atom   | 3.5      | 25.21                                      | 15.4                            | 3.76             | This work |
| Pt <sub>1</sub> @SiMo <sub>12</sub> @PC                                  | Dual-confinement impregnation                              | Confining                              | Single-atom   | 3.81     | 17.23                                      | 9.76                            | 6.12             | This work |
| Pt <sub>1</sub> @SiW <sub>12</sub> @PC                                   | Dual-confinement impregnation                              | Confining                              | Single-atom   | 3.1      | 10.17                                      | 18.5                            | 6.8              | This work |

**Table S10.** Fitted data of EIS Nyquist plots by the equivalent circuit for Pt<sub>1</sub>@PC, Pt<sub>1</sub>@POMs@PC, and Pt-POMs/AC.

| Catalyst                               | $\eta$ (mV) | R <sub>s</sub> | CPE <sub>1</sub> | R <sub>1</sub> | CPE <sub>2</sub> | R <sub>3</sub> | C <sub>p</sub> (F) | R <sub>2</sub> |
|----------------------------------------|-------------|----------------|------------------|----------------|------------------|----------------|--------------------|----------------|
| Pt <sub>1</sub> @PC                    | 0           | 8.25           | 0.00093          | 3.933          | 0.013            | 4.80           | 0.0097             | 1301           |
|                                        | 5           | 8.22           | 0.00092          | 3.68           | 0.020            | 4.92           | 0.013              | 120.1          |
|                                        | 10          | 8.25           | 0.0013           | 3.48           | 0.036            | 3.18           | 0.018              | 13.89          |
|                                        | 15          | 8.39           | 0.00082          | 2.62           | 0.041            | 2.45           | 0.022              | 3.46           |
|                                        | 20          | 8.41           | 0.00092          | 2.9            | 0.034            | 2.36           | 0.026              | 0.63           |
|                                        | 25          | 8.60           | 0.00092          | 2.93           | 0.031            | 2.08           | 0.028              | 0.32           |
|                                        | 30          | 8.67           | 0.00095          | 2.65           | 0.026            | 1.74           | 0.033              | 0.28           |
|                                        | 35          | 8.56           | 0.00097          | 2.25           | 0.031            | 1.87           | 0.034              | 0.24           |
|                                        | 40          | 8.86           | 0.00064          | 2.08           | 0.052            | 1.75           | 0.036              | 0.16           |
| Pt <sub>1</sub> @PW <sub>12</sub> @PC  | 0           | 8.47           | 6.76E-5          | 0.69           | 0.0031           | 9.86           | 0.013              | 2196           |
|                                        | 5           | 8.47           | 8.76E-5          | 0.59           | 0.0034           | 8.19           | 0.019              | 458.5          |
|                                        | 10          | 8.65           | 3.40E-5          | 0.69           | 0.0016           | 6.06           | 0.032              | 54.9           |
|                                        | 15          | 9.41           | 3.12E-5          | 0.71           | 0.0015           | 5.22           | 0.048              | 15.7           |
|                                        | 20          | 9.63           | 2.13E-5          | 0.60           | 0.0014           | 4.68           | 0.054              | 5.80           |
|                                        | 25          | 8.87           | 2.07E-5          | 0.70           | 0.0013           | 4.26           | 0.064              | 4.09           |
|                                        | 30          | 8.89           | 3.89E-5          | 0.73           | 0.0013           | 4.10           | 0.078              | 3.38           |
|                                        | 35          | 9.17           | 2.13E-5          | 0.88           | 0.0013           | 4.09           | 0.091              | 2.74           |
|                                        | 40          | 9.79           | 3.00E-5          | 0.99           | 0.0012           | 3.90           | 0.099              | 2.55           |
| Pt-PW <sub>12</sub> /AC                | 0           | 8.73           | 2.35E-5          | 7.24           | 0.00019          | 1682           | 0.0018             | 5927           |
|                                        | 5           | 8.70           | 3.01E-5          | 7.66           | 0.00016          | 1148           | 0.0027             | 3060           |
|                                        | 10          | 9.08           | 2.71E-5          | 7.06           | 0.00017          | 754.8          | 0.0042             | 1803           |
|                                        | 15          | 9.00           | 2.80E-5          | 7.08           | 0.00014          | 607.4          | 0.0052             | 339.4          |
|                                        | 20          | 9.57           | 3.95E-5          | 7.71           | 0.00013          | 455.2          | 0.0058             | 128.3          |
|                                        | 25          | 9.58           | 3.09E-5          | 6.75           | 0.00013          | 354.7          | 0.0071             | 63.19          |
|                                        | 30          | 9.31           | 4.09E-5          | 6.90           | 0.00013          | 267.6          | 0.0082             | 35.90          |
|                                        | 35          | 9.60           | 4.79E-5          | 6.94           | 0.00013          | 194.7          | 0.0099             | 20.15          |
|                                        | 40          | 10.25          | 3.51E-5          | 6.02           | 0.00016          | 139.8          | 0.012              | 18.51          |
| Pt <sub>1</sub> @PMO <sub>12</sub> @PC | 0           | 9.06           | 0.00016          | 2.02           | 0.0052           | 17.49          | 0.014              | 5143           |
|                                        | 5           | 8.93           | 0.00016          | 2.20           | 0.0073           | 15.3           | 0.019              | 770.8          |
|                                        | 10          | 9.38           | 0.00014          | 2.06           | 0.0034           | 9.47           | 0.039              | 63.63          |
|                                        | 15          | 9.24           | 0.00014          | 2.06           | 0.0033           | 8.31           | 0.084              | 11.49          |
|                                        | 20          | 9.42           | 0.00017          | 2.23           | 0.0027           | 6.16           | 0.10               | 2.23           |
|                                        | 25          | 9.14           | 0.00025          | 2.35           | 0.0027           | 6.26           | 0.12               | 2.17           |
|                                        | 30          | 9.27           | 0.00022          | 2.35           | 0.0032           | 6.42           | 0.13               | 1.11           |
|                                        | 35          | 9.79           | 0.00016          | 2.07           | 0.0044           | 5.75           | 0.14               | 1.07           |
|                                        | 40          | 9.07           | 0.00014          | 2.17           | 0.0038           | 5.65           | 0.16               | 0.97           |
| Pt-PMO <sub>12</sub> /AC               | 0           | 8.39           | 6.83E-5          | 6.10           | 0.00016          | 780.3          | 0.0026             | 2196           |
|                                        | 5           | 8.40           | 8.21E-5          | 6.46           | 0.00015          | 574.7          | 0.0034             | 458.5          |
|                                        | 10          | 8.15           | 4.61E-5          | 6.30           | 0.00015          | 430.3          | 0.0044             | 54.32          |
|                                        | 15          | 7.86           | 4.21E-5          | 7.09           | 0.00015          | 325.1          | 0.0055             | 15.47          |
|                                        | 20          | 8.19           | 5.01E-5          | 6.43           | 0.00017          | 252.6          | 0.0068             | 5.52           |
|                                        | 25          | 8.31           | 5.87E-5          | 5.88           | 0.00019          | 199.0          | 0.0076             | 3.91           |
|                                        | 30          | 8.61           | 5.67E-5          | 6.44           | 0.00020          | 154.5          | 0.0089             | 3.25           |
|                                        | 35          | 8.55           | 6.89E-5          | 5.52           | 0.00026          | 118.0          | 0.0095             | 2.88           |
|                                        | 40          | 9.23           | 5.33E-5          | 4.42           | 0.00035          | 74.39          | 0.0117             | 2.79           |
| Pt <sub>1</sub> @SiW <sub>12</sub> @PC | 0           | 7.91           | 1.92E-5          | 0.89           | 0.0023           | 9.203          | 0.017              | 2093           |
|                                        | 5           | 8.53           | 1.47E-5          | 0.79           | 0.0022           | 7.65           | 0.025              | 231.2          |
|                                        | 10          | 8.27           | 2.77E-5          | 0.93           | 0.0014           | 5.17           | 0.043              | 24.4           |
|                                        | 15          | 8.39           | 2.83E-5          | 0.86           | 0.0012           | 4.36           | 0.065              | 6.53           |
|                                        | 20          | 8.55           | 3.25E-5          | 0.97           | 0.0011           | 4.07           | 0.071              | 3.28           |
|                                        | 25          | 8.22           | 3.25E-5          | 1.07           | 0.0008           | 3.36           | 0.082              | 2.69           |
|                                        | 30          | 8.20           | 4.81E-5          | 1.14           | 0.0008           | 3.28           | 0.093              | 2.48           |
| 35                                     | 8.29        | 4.09E-5        | 1.19             | 0.0007         | 2.89             | 0.099          | 2.22               |                |

|                           |    |       |         |       |         |       |        |       |
|---------------------------|----|-------|---------|-------|---------|-------|--------|-------|
|                           | 40 | 8.56  | 4.17E-5 | 1.25  | 0.0007  | 1.00  | 0.113  | 1.01  |
| Pt-SiW <sub>12</sub> /AC  | 0  | 8.69  | 0.00017 | 7.41  | 0.00018 | 1292  | 0.0022 | 4918  |
|                           | 5  | 8.90  | 0.00015 | 8.16  | 0.00016 | 870.7 | 0.0039 | 2075  |
|                           | 10 | 9.01  | 0.00020 | 9.40  | 0.00015 | 632.4 | 0.0054 | 562.5 |
|                           | 15 | 9.16  | 0.00022 | 9.37  | 0.00014 | 467.7 | 0.0083 | 215.7 |
|                           | 20 | 9.23  | 0.00029 | 10.56 | 0.00014 | 329.3 | 0.011  | 98.31 |
|                           | 25 | 8.82  | 0.00083 | 9.28  | 0.00018 | 219.2 | 0.013  | 72.11 |
|                           | 30 | 9.71  | 0.00049 | 10.76 | 0.00016 | 143.3 | 0.014  | 56.70 |
|                           | 35 | 9.87  | 0.00076 | 9.45  | 0.00029 | 81.11 | 0.015  | 32.21 |
|                           | 40 | 9.75  | 0.00076 | 7.44  | 0.00025 | 68.35 | 0.017  | 17.56 |
| Pt@SiMo <sub>12</sub> @PC | 0  | 8.58  | 4.91E-5 | 2.62  | 0.0027  | 16.50 | 0.018  | 4323  |
|                           | 5  | 8.67  | 4.74E-5 | 2.58  | 0.0024  | 13.28 | 0.026  | 587.9 |
|                           | 10 | 8.50  | 6.52E-5 | 2.86  | 0.0019  | 10.60 | 0.044  | 47.16 |
|                           | 15 | 8.57  | 5.84E-5 | 2.73  | 0.0023  | 9.77  | 0.074  | 8.42  |
|                           | 20 | 8.58  | 6.19E-5 | 2.73  | 0.0023  | 9.34  | 0.098  | 2.21  |
|                           | 25 | 8.56  | 6.29E-5 | 2.73  | 0.0025  | 9.04  | 0.11   | 1.07  |
|                           | 30 | 8.70  | 7.72E-5 | 2.88  | 0.0029  | 8.67  | 0.12   | 0.69  |
|                           | 35 | 8.64  | 6.83E-5 | 2.60  | 0.0031  | 8.25  | 0.13   | 0.58  |
|                           | 40 | 8.70  | 7.07E-5 | 2.39  | 0.0038  | 7.81  | 0.14   | 0.50  |
| Pt-SiMo <sub>12</sub> /AC | 0  | 8.40  | 1.07E-5 | 9.96  | 8.92E-5 | 1408  | 0.0021 | 17219 |
|                           | 5  | 8.21  | 1.44E-5 | 10.36 | 8.24E-5 | 965.6 | 0.0028 | 4314  |
|                           | 10 | 8.26  | 2.09E-5 | 10.24 | 7.70E-5 | 658.8 | 0.0040 | 878.5 |
|                           | 15 | 8.24  | 2.52E-5 | 9.87  | 8.07E-5 | 485.8 | 0.0052 | 290.5 |
|                           | 20 | 8.24  | 2.87E-5 | 9.00  | 8.53E-5 | 353.4 | 0.0067 | 136.7 |
|                           | 25 | 8.33  | 3.74E-5 | 8.84  | 9.25E-5 | 283.3 | 0.0083 | 55.29 |
|                           | 30 | 8.30  | 5.87E-5 | 8.37  | 0.00010 | 216.5 | 0.0094 | 21.85 |
|                           | 35 | 8.49  | 0.00010 | 7.19  | 0.00013 | 155.7 | 0.0096 | 9.84  |
|                           | 40 | 10.53 | 0.00021 | 6.13  | 0.00022 | 96.58 | 0.0138 | 5.12  |



**Table S11.** Electron transfer based on Hirshfeld population analysis.

| Label                                     | Q(Pt), Hirshfeld |
|-------------------------------------------|------------------|
| Pt <sub>1</sub> @PMo <sub>12</sub> @G-01  | 5.57             |
| Pt <sub>1</sub> @PMo <sub>12</sub> /G     | 4.56             |
| Pt <sub>1</sub> @PW <sub>12</sub> @G-01   | 3.41             |
| Pt <sub>1</sub> @PW <sub>12</sub> /G      | 3.42             |
| Pt <sub>1</sub> @SiMo <sub>12</sub> @G-01 | 5.52             |
| Pt <sub>1</sub> @SiMo <sub>12</sub> /G    | 4.49             |
| Pt <sub>1</sub> @SiW <sub>12</sub> @PC-01 | 3.43             |
| Pt <sub>1</sub> @SiW <sub>12</sub> /G     | 3.47             |
| Pt <sub>1</sub> @G(O)                     | 2.88             |

\* Positive value means Pt is losing electrons.

**Table S12.** Contents of Pt and M (Mo or W) in Pt<sub>1</sub>@PC and Pt<sub>1</sub>@POMs@PC by ICP-OES.

| Catalysts                               | Pt (wt%) | Mo (wt%) | W(wt%) |
|-----------------------------------------|----------|----------|--------|
| Pt <sub>1</sub> @ PC                    | 6.63     | —        | —      |
| Pt <sub>1</sub> @PMo <sub>12</sub> @PC  | 2.15     | 7.92     | —      |
| Pt <sub>1</sub> @SiMo <sub>12</sub> @PC | 3.81     | 7.69     | —      |
| Pt <sub>1</sub> @PW <sub>12</sub> @PC   | 3.50     | —        | 15.38  |
| Pt <sub>1</sub> @SiW <sub>12</sub> @PC  | 3.10     | —        | 14.89  |

**Table S13.** The calculated elemental compositions by XPS spectra.

| Catalysts                               | Pt (at%) | Mo (at%) | W (at%) | C (at%) | O (at%) | P(at%) | Si (at%) |
|-----------------------------------------|----------|----------|---------|---------|---------|--------|----------|
| Pt <sub>1</sub> @PC                     | 0.31     | —        | —       | 94.24   | 0.05    | —      | —        |
| PMo <sub>12</sub> @PC                   | —        | 0.82     | —       | 91.88   | 6.88    | 0.41   | —        |
| Pt <sub>1</sub> @PMo <sub>12</sub> @PC  | 0.19     | 0.75     | —       | 90.8    | 6.55    | 0.45   | —        |
| SiMo <sub>12</sub> @PC                  | —        | 0.78     | —       | 91.07   | 7.72    | —      | 0.43     |
| Pt <sub>1</sub> @SiMo <sub>12</sub> @PC | 0.23     | 0.5      | —       | 90.62   | 6.55    | —      | 0.69     |
| PW <sub>12</sub> @PC                    | —        | —        | 0.9     | 91.39   | 7.20    | 0.52   | —        |
| PC@PW <sub>12</sub> @Pt <sub>1</sub>    | 0.25     | —        | 0.77    | 90.34   | 6.57    | 0.25   | —        |
| PC@SiW <sub>12</sub>                    | —        | —        | 0.59    | 92.6    | 6.37    | —      | 0.5      |
| Pt <sub>1</sub> @SiW <sub>12</sub> @PC  | 0.24     | —        | 0.58    | 91.27   | 5.94    | —      | 0.9      |
| Catalysts                               | Pt (wt%) | Mo (wt%) | W (wt%) | C (wt%) | O (wt%) | P(wt%) | Si (wt%) |
| Pt <sub>1</sub> @PC                     | 4.61     | —        | —       | 86.38   | 4.72    | —      | —        |
| PMo <sub>12</sub> @PC                   | —        | 6.03     | —       | 84.56   | 8.43    | 0.97   | —        |
| Pt <sub>1</sub> @PMo <sub>12</sub> @PC  | 2.72     | 5.28     | —       | 79.98   | 7.69    | 1.02   | —        |
| SiMo <sub>12</sub> @PC                  | —        | 5.74     | —       | 83.90   | 9.48    | —      | 0.93     |
| Pt <sub>1</sub> @SiMo <sub>12</sub> @PC | 3.31     | 3.54     | —       | 80.30   | 7.74    | —      | 1.43     |
| PW <sub>12</sub> @PC                    | —        | —        | 11.8    | 78.70   | 1.15    | 1.16   | —        |
| Pt <sub>1</sub> @PW <sub>12</sub> @PC   | 3.40     | —        | 9.76    | 74.75   | 7.24    | 1.47   | —        |
| SiW <sub>12</sub> @PC                   | —        | —        | 8.12    | 83.19   | 7.63    | —      | 1.05     |
| Pt <sub>1</sub> @SiW <sub>12</sub> @PC  | 3.33     | —        | 7.57    | 77.82   | 6.75    | —      | 1.80     |

As revealed by the calculated elemental compositions (**Table S11**), the Pt content in Pt<sub>1</sub>@POMs@PC is lower than that in the Pt<sub>1</sub>@PC, which is in line with the ICP-OES results (**Table S12**).

**Note S1**

Keggin-structure POMs show a classical structure with one P/Si atom in the center that is caged by 12 octahedral MoO<sub>6</sub>/WO<sub>6</sub>-units linked together by 24 bridging oxygen atoms (O<sub>br</sub>). Another 12 corner oxygen atoms (O<sub>c</sub>) complete the structure, each of which is double-bonded with an additional Mo/W atom. Due to the exposed 36 oxygen atoms, POMs furnishes a range of coordination sites (**Fig. 1a**) made of the single corner site, the bridge site (the O<sub>c</sub>-O<sub>br</sub>-bridge site), the threefold hollow site (O<sub>c</sub> 3H and O<sub>br</sub> 3H), and the four-fold hollow site (O4H).<sup>17</sup>

## Note S2

In the Pt<sub>1</sub>@POMs@PC system, the HER can be split into three parts: (i) the protons are adsorbed on the Pt surfaces and reduced to hydrogen atoms (Volmer), (ii) the hydrogen atoms migrate via the H-buffer chains (Pt→O<sub>br</sub>→O<sub>3</sub>H→Mo/W→O<sub>c</sub>→PC<sub>sub-1-nm</sub>) (H-spillover), and (iii) adsorbed H atoms combine to generate the hydrogen molecules which are desorbed (Tafel).

The corresponding reactions are as follows <sup>62, 63</sup>:

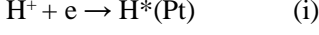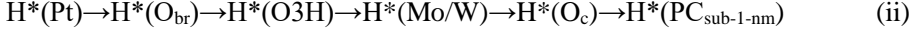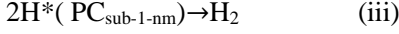

For the Volmer–H-spillover–Tafel reaction on Pt<sub>1</sub>@POMs@PC, the derivation process of the Tafel slope is as follows:

Assuming  $\theta_{\text{POMs-H}}^0$  is the hydrogen coverage on POMs at equilibrium potential.

At certain overpotential  $V$ ,

$$\theta_{\text{POMs-H}} = \theta_{\text{POMs-H}}^0 \exp\left(-\frac{FV}{RT}\right) \quad (\text{iv})$$

The concentration of hydrogen ions under an electric field is

$$C_{\text{H}^*} \exp\left(-\frac{\alpha FV}{RT}\right) \quad (\text{v})$$

The hydrogen coverage on the Pt surface was determined by hydrogen concentration and the hydrogen coverage on the POMs surface:

$$\theta_{\text{Pt-H}} = k_1 \theta_{\text{POMs-H}} C_{\text{H}^*} \exp\left(-\frac{\alpha FV}{RT}\right) = k_1 \theta_{\text{POMs-H}}^0 C_{\text{H}^*} \exp\left(-\frac{(1+\alpha)FV}{RT}\right) \quad (\text{vi})$$

On Pt surface, the adsorbed hydrogen atoms combine to form a hydrogen molecule:

$$-j_c = 2Fk_0 \theta_{\text{Pt-H}}^2 = 2Fk_0 k_1^2 (\theta_{\text{POMs-H}}^0)^2 C_{\text{H}^*}^2 \exp\left(-\frac{2(1+\alpha)FV}{RT}\right) \quad (\text{vii})$$

$$\lg(-j) = \text{Const} + 2\lg C_{\text{H}^*} - \frac{2(1+\alpha)FV}{2.303RT} \quad (\text{viii})$$

Therefore, the Tafel slope is:

$$\frac{2(1+\alpha)FV}{2.303RT} \quad (\text{ix})$$

The partial order for pH of 2 is the reaction order of  $\lg C_{\text{H}^*}$  from equation (viii), which is deduced on the complete coverage of H\* in the ideal state. Therefore, when the slope ( $\log j$  vs. pH) for Pt<sub>1</sub>@POMs@PC approaches the theoretical value of 2, it signifies nearly unhindered migration of H\*, representing the occurrence of H-spillover. So, that partial order concerning pH of 2 can represent the H-spillover involved mechanism.

### Note S3

The relationship between the exchange current ( $j_0$ ) and the Tafel slope as follows<sup>20, 21</sup>:

The dependence of overpotential on exchange current and Tafel slope is given by

$$\eta = b \log \frac{j}{j_0} \quad (1)$$

To analyze the key determinants of  $j_0$ , it was necessary to utilize the Arrhenius equation. The Arrhenius equation (eq 2) gives the temperature dependence of the rate constant of any chemical reaction.

$$k = A_{freq} \exp\left(\frac{-E_{act}}{RT}\right) \quad (2)$$

where  $A_{freq}$  is collision frequency. The activation energy ( $E_{act}$ ) is enthalpy that comprises activation free energy ( $\Delta G_{act}$ ) and activation entropy ( $\Delta S_{act}$ ). For HER, the free energy of activation depends on the standard free energy of activation ( $\Delta G^*$ ), the adsorption energy of intermediate formation ( $\Delta G_{ad}$ ), and the electrode potential. Then the rate constant becomes

$$k = A_{freq} \exp\left(\frac{-\Delta S_{act}}{RT}\right) \exp\left(\frac{-\Delta G^*}{RT}\right) \exp\left(\frac{-\gamma \Delta G_{ad}}{RT}\right) \exp\left(\frac{-\beta FE_{rev}}{RT}\right) \quad (3)$$

The most general equation for the rate of reaction in electrochemistry shows a direct relationship between the current density and the rate constant ( $k$ ) concerning the (over)potential and the concentration of all reactants ( $\Pi_i c_i^R$ ). This equation is related to the rate determination step:

$$j = nF \Pi_i c_i^R k \quad (4)$$

By plugging the rate constant (eq. 3) into the equation for current density (eq. 4), where the reactants are protons capable of adsorbing on the surface of the metal (sites not yet occupied by intermediates) on the available active site, eq. 4 can be obtained:

$$j = nF c^p(\text{H}^+) (1 - \theta)^q A_{freq} \exp\left(\frac{-\Delta S_{act}}{RT}\right) \exp\left(\frac{-\Delta G^*}{RT}\right) \exp\left(\frac{-\gamma \Delta G_{ad}}{RT}\right) \exp\left(\frac{-\beta FE_{rev}}{RT}\right) \quad (5)$$

If we are at reversible potential and we transform the reaction rate (eq. 5) into a semilogarithmic relation, we get

$$\log j_0 = \log(nF c^p(\text{H}^+) (1 - \theta)^q A_{freq}) + \frac{1}{2.303} \left( \frac{-\Delta S_{act}}{RT} + \frac{-\Delta G^*}{RT} + \frac{-\beta FE_{rev}}{RT} + \frac{-\gamma \Delta G_{ad}}{RT} \right) \quad (6)$$

Finally, we obtain a form of the equation that is relevant to the experimental work

$$\log j_0 = \log A - \frac{E_{act}}{2.303RT} \quad (7)$$



#### Note S4

X-ray absorption fine structure (XAFS) including X-ray absorption near-edge structure (XANES) and extended X-ray absorption fine structure (EXAFS) of the Pt<sub>1</sub>@PMo<sub>12</sub>@PC and Pt<sub>1</sub>@PC were collected at the SPring-8 14b2, where a pair of channel-cut Si (111) crystals was used in the monochromator. The storage ring was working at the energy of 8.0 GeV with an average electron current of 99.5 mA. Data reduction, data analysis, and EXAFS fitting were performed and analyzed with the Athena and Artemis programs of the Demeter data analysis packages<sup>64</sup> that utilize the FEFF6 program<sup>65</sup> to fit the EXAFS data. The energy calibration of the sample was conducted through standard and Pt foil and Mo foil, which as a reference was simultaneously measured. A linear function was subtracted from the pre-edge region, then the edge jump was normalized using Athena software. The  $\chi(k)$  data were isolated by subtracting a smooth, third-order polynomial approximating the absorption background of an isolated atom. The  $k^3$ -weighted  $\chi(k)$  data were Fourier transformed after applying a HanFeng window function ( $\Delta k = 1.0$ ). For EXAFS modeling, The global amplitude EXAFS ( $CN$ ,  $R$ ,  $\sigma^2$  and  $\Delta E_0$ ) were obtained by nonlinear fitting, with least-squares refinement, of the EXAFS equation to the Fourier-transformed data in  $R$ -space, using Artemis software, EXAFS of the Pt foil and Mo foil are fitted and the obtained amplitude reduction factor  $S_0^2$  value (0.756 and 0.938) was set in the EXAFS analysis to determine the coordination numbers ( $CNs$ ) in the Pt–O, Pt–Cl and Mo–O scattering path in sample.

### Note S5

The  $C_{dl}$  was obtained based on the CV of the double-layer region (non-Faradaic reaction region).<sup>22</sup> By plotting  $\Delta j/2 = (j_{anodic} - j_{cathodic})/2$  against the scan rates (5, 10, 20, 40, 60, 80, 100, 120, 140, 160, 180, and 200  $\text{mV s}^{-1}$ ), the slope of the fitting line was regarded as the geometric  $C_{dl}$  of the sample. The  $j_{anodic}$  and  $j_{cathodic}$  indicate the current density of the anodic and cathodic sweeps at the midpoint of the potential region, respectively. Moreover, ECSA is calculated by assuming a standard value of  $C_{dlref}$  ( $60 \mu\text{F cm}^{-2}$ ):<sup>66</sup> 
$$\text{ECSA} = \frac{C_{dl}}{C_{dlref}}$$

The mass activity is calculated based on the following equation:  $\text{Mass Activity} = \frac{I}{m}$ , where  $I$  (A) is the measured current,  $m$  (mg) is the mass of Pt loaded on the glassy carbon electrode. The turnover frequency (TOF) is calculated based on the following equation:<sup>67</sup> 
$$\text{TOF} = \frac{I}{2Fn}$$
 where  $I$  (A) is the measured current,  $F$  is the Faraday constant ( $96485 \text{ C mol}^{-1}$ ),  $n = \frac{m}{M}$ ,  $n$  (mol) is the molar amount of Pt loaded on the glassy carbon electrode,  $m$  is the mass of Pt, and  $M$  is the molecule weight.

**Note S6**

The binding energy ( $E_b$ ) of Pt in Pt@G(O) is defined as:

$$E_b = E(\text{Pt}_1 @ \text{G}(\text{O})) - E(\text{G}(\text{O})) - E(\text{Pt})$$

The binding energy ( $E_b$ ) of Pt in Pt<sub>1</sub>@G(O/POM) is defined as:

$$E_b = E(\text{Pt}_1 @ \text{G}(\text{O}/\text{POM})) - E(\text{G}(\text{O}/\text{POM})) - E(\text{Pt})$$

The binding energy ( $E_b$ ) of Pt in PtCl<sub>3</sub>-O<sub>2</sub>@G is defined as:

$$E_b = E(\text{PtCl}_3\text{-O}_2 @ \text{G}) - E(\text{O}_2 @ \text{G}) - E(\text{PtCl}_3)$$

The binding energy ( $E_b$ ) of Pt in Pt<sub>1</sub>@POMs/G is defined as:

$$E_b = E(\text{Pt}_1 @ \text{POMs}/\text{G}) - E(\text{POMs}/\text{G}) - E(\text{Pt})$$

**Note S7**

The charge density difference of Pt@G(O) is defined as:

$$\Delta\rho = \rho(\text{Pt}_1 @ \text{G}(\text{O})) - \rho(\text{G}(\text{O})) - \rho(\text{Pt})$$

The binding energy ( $E_b$ ) of Pt in PtCl<sub>3</sub>-O<sub>2</sub>@G is defined as:

$$\Delta\rho = \rho(\text{PtCl}_3\text{-O}_2 @ \text{G}) - \rho(\text{O}_2 @ \text{G}) - \rho(\text{PtCl}_3)$$

The binding energy ( $E_b$ ) of Pt in Pt<sub>1</sub>@POMs/G is defined as:

$$\Delta\rho = \rho(\text{Pt}_1 @ \text{POMs/G}) - \rho(\text{POMs/G}) - \rho(\text{Pt})$$

## Reference

1. S. Yang, M. Wang, Y. Zhang, P. He, W. Cong, C. Wang, Q. Yang, X. Liu, T. Wang, X. Zhang and J. Zhou, *Energy Environ. Mater.*, 2022, **6**, e12396.
2. C. Bannwarth, E. Caldeweyher, S. Ehlert, A. Hansen, P. Pracht, J. Seibert, S. Spicher and S. Grimme, *WIREs Comput. Mol. Sci.*, 2020, **11**, e1493.
3. R. Kobayashi, M. A. Addicoat, A. T. B. Gilbert, R. D. Amos and M. A. Collins, *WIREs Comput. Mol. Sci.*, 2019, **9**, e1413.
4. P. Král, *Nat. Mater.*, 2019, **18**, 99–101.
5. A. Govind Rajan, K. S. Silmore, J. Swett, A. W. Robertson, J. H. Warner, D. Blankschtein and M. S. Strano, *Nat. Mater.*, 2019, **18**, 129–135.
6. R. Tran, Z. Xu, B. Radhakrishnan, D. Winston, W. Sun, K. A. Persson and S. P. Ong, *Sci. Data*, 2016, **3**, 160080.
7. T. Lu and F. Chen, *J. Comput. Chem.*, 2011, **33**, 580–592.
8. J. K. Nørskov, T. Bligaard, A. Logadottir, J. R. Kitchin, J. G. Chen, S. Pandelov and U. Stimming, *J. Electrochem. Soc.*, 2005, **152**, J23–J26.
9. S. Spicher and S. Grimme, *Angew. Chem. Int. Ed.*, 2020, **59**, 15665–15673.
10. Y. Liu, X. Wu, Z. Li, J. Zhang, S.-X. Liu, S. Liu, L. Gu, L. R. Zheng, J. Li, D. Wang and Y. Li, *Nat. Commun.*, 2021, **12**, 4202.
11. B. Zhang, G. Sun, S. Ding, H. Asakura, J. Zhang, P. Sautet and N. Yan, *J. Am. Chem. Soc.*, 2019, **141**, 8185–8197.
12. W. Wang, J. Zhou, Z. Wang, L. Zhao, P. Li, Y. Yang, C. Yang, H. Huang and S. Guo, *Adv. Energy Mater.*, 2018, **8**.
13. T. Ma, H. Cao, S. Li, S. Cao, Z. Zhao, Z. Wu, R. Yan, C. Yang, Y. Wang, P. A. V. Aken, L. Qiu, Y. G. Wang and C. Cheng, *Adv. Mater.*, 2022, **34**, e2206368.
14. F. Y. Yu, Z. L. Lang, Y. J. Zhou, K. Feng, H. Q. Tan, J. Zhong, S. T. Lee, Z. H. Kang and Y. G. Li, *ACS Energy Lett.*, 2021, **6**, 4055–4062.
15. Q. Y. Li, L. Zhang, Y. X. Xu, Q. Li, H. Xue and H. Pang, *ACS Sustain. Chem. Eng.*, 2019, **7**, 5027–5033.
16. Y. Liu, J. Ding, F. Li, X. Su, Q. Zhang, G. Guan, F. Hu, J. Zhang, Q. Wang, Y. Jiang, B. Liu and H. B. Yang, *Adv. Mater.*, 2023, **35**, e2207114.
17. B. Zhang, H. Asakura, J. Zhang, J. Zhang, S. De and N. Yan, *Angew. Chem. Int. Ed.*, 2016, **55**, 8319–8323.
18. J. Ohyama, D. Kumada and A. Satsuma, *J. Mater. Chem. A*, 2016, **4**, 15980–15985.
19. J. Dai, Y. Zhu, Y. Chen, X. Wen, M. Long, X. Wu, Z. Hu, D. Guan, X. Wang, C. Zhou, Q. Lin, Y. Sun, S.-C. Weng, H. Wang, W. Zhou and Z. Shao, *Nat. Commun.*, 2022, **13**, 1189.
20. P. Narangoda, I. Spanos, J. Masa, R. Schlögl and A. R. Zeradjanin, *ChemElectroChem*, 2022, **9**, e202101278.
21. A. R. Zeradjanin, P. Narangoda, J. Masa and R. Schlögl, *ACS Catal.*, 2022, **12**, 11597–11605.
22. J. Chen, C. Chen, M. Qin, B. Li, B. Lin, Q. Mao, H. Yang, B. Liu and Y. Wang, *Nat. Commun.*, 2022, **13**, 5382.
23. J. Wu, X. Wang, W. Zheng, Y. Sun, Y. Xie, K. Ma, Z. Zhang, Q. Liao, Z. Tian, Z. Kang and Y. Zhang, *J. Am. Chem. Soc.*, 2022, **144**, 19163–19172.
24. T. M. Nahir and E. F. Bowden, *J. Electroanal. Chem.*, 1996, **410**, 9–13.

25. S. Sun and S. Chen, *Electrocatalysis*, Beijing: Chemical Industry Press, 2013.
26. H. Peng, X. Yang, Y. Ma, J. Liu, Y. Wang, H. Tan and Y. Li, *CrystEngComm*, 2018, **20**, 5387-5394.
27. T. Zhang, S. Weng, X. Wang, Z. Zhang, Y. Gao, T. Lin, Y. Zhu, W. Zhang and C. Sun, *J. Colloid Interface Sci.*, 2022, **624**, 704-712.
28. C. Zhang, Y. Hong, R. Dai, X. Lin, L.-S. Long, C. Wang and W. Lin, *ACS Appl. Mater. Interfaces*, 2015, **7**, 11648-11653.
29. F. Y. Yu, Z. L. Lang, L. Y. Yin, K. Feng, Y. J. Xia, H. Q. Tan, H. T. Zhu, J. Zhong, Z. H. Kang and Y. G. Li, *Nat. Commun.*, 2020, **11**, 490.
30. R. Hashemniaye Torshizi, N. Ashraf, M. H. Arbab Zavar and S. Dianat, *Catal. Sci. Technol.*, 2020, **11**, 1098-1109.
31. J. Zhu, Y. Cen, H. Ma, W. Lian, J. Liu, H. Ou, F. Ouyang, L. Zhang and W. Zhang, *Nanoscale Horiz.*, 2023, **8**, 1273-1281.
32. S. Zhai, D. Zhai, L. Sun, N. Feng, X. Chen, W.-Q. Deng and H. Wu, *Mater. Chem. Front.*, 2023, **7**, 2889-2895.
33. C. Wang, H. Zang, C. Liu, J. Wang, L. Kuai and B. Geng, *Inorg. Chem.*, 2023, **62**, 6856-6863.
34. S. J. Park, T. H. Nguyen, D. T. Tran, V. A. Dinh, J. H. Lee and N. H. Kim, *Energy Environ. Sci.*, 2023, **16**, 4093-4104.
35. H. Ying, D. Hengli, L. Wei, Z. Chenhui, W. Baoshun, J. Qinyuan, F. Sihua, Y. Wensheng, T. Ting and Z. Rufan, *Appl. Catal. B*, 2023, **335**, 122898.
36. J. Zhang, M. Wang, T. Wan, H. Shi, A. Lv, W. Xiao and S. Jiao, *Adv. Mater.*, 2022, **34**, 2206960.
37. G. Zhan, Y. Yao, F. Quan, H. Gu, X. Liu and L. Zhang, *J. Energy Chem.*, 2022, **72**, 203-209.
38. S. Jiao, M. Kong, Z. Hu, S. Zhou, X. Xu and L. Liu, *Small*, 2022, **18**, 2105129.
39. W. Zhong, W. Tu, Z. Wang, Z. Lin, A. Xu, X. Ye, D. Chen and B. Xiao, *J. Energy Chem.*, 2020, **51**, 280-284.
40. Y. H. Lai, S. R. Li, S. M. G., H. T. Chang, Y. B. Huang, Y. K. Li, Y. M. Chen, S. B. Patil, S. Y. Chang, P. K. Chen, C. C. Chang, Y. C. Chen, C. W. Pao, J. L. Chen, C. Y. Wei, I. K. Lin, H. L. Chou, C. J. Su, U. S. Jeng, T. R. Kuo, C. Y. Wen and D. Y. Wang, *J. Mater. Chem. A*, 2021, **9**, 22901-22912.
41. D. Kobayashi, H. Kobayashi, D. Wu, S. Okazoe, K. Kusada, T. Yamamoto, T. Toriyama, S. Matsumura, S. Kawaguchi, Y. Kubota, S. M. Aspera, H. Nakanishi, S. Arai and H. Kitagawa, *J. Am. Chem. Soc.*, 2020, **142**, 17250-17254.
42. X. P. Yin, H. J. Wang, S. F. Tang, X. L. Lu, M. Shu, R. Si and T. B. Lu, *Angew. Chem. Int. Ed.*, 2018, **57**, 9382-9386.
43. C. Li, Z. Chen, H. Yi, Y. Cao, L. Du, Y. Hu, F. Kong, R. Kramer Campen, Y. Gao, C. Du, G. Yin, I. Y. Zhang and Y. Tong, *Angew. Chem. Int. Ed.*, 2020, **59**, 15902-15907.
44. M. Sun, J. Ji, M. Hu, M. Weng, Y. Zhang, H. Yu, J. Tang, J. Zheng, Z. Jiang, F. Pan, C. Liang and Z. Lin, *ACS Catal.*, 2019, **9**, 8213-8223.
45. H. Tian, X. Cui, L. Zeng, L. Su, Y. Song and J. Shi, *J. Mater. Chem. A*, 2019, **7**, 6285-6293.
46. S. Ye, F. Luo, Q. Zhang, P. Zhang, T. Xu, Q. Wang, D. He, L. Guo, Y. Zhang, C. He, X.



- Ouyang, M. Gu, J. Liu and X. Sun, *Energy Environ. Sci.*, 2018, **12**, 1000–1007.
47. H. Ma, X. Huang, L. Li, W. Peng, S. Lin, Y. Ding and L. Mai, *Small*, 2023, **19**, 2302685.
48. P. Kuang, Y. Wang, B. Zhu, F. Xia, C. W. Tung, J. Wu, H. M. Chen and J. Yu, *Adv. Mater.*, 2021, **33**, 2008599.
49. J. Park, S. Lee, H. E. Kim, A. Cho, S. Kim, Y. Ye, J. W. Han, H. Lee, J. H. Jang and J. Lee, *Angew. Chem. Int. Ed.*, 2019, **58**, 16038–16042.
50. H. Jin, S. Sultan, M. Ha, J. N. Tiwari, M. G. Kim and K. S. Kim, *Adv. Funct. Mater.*, 2020, **30**, 2000531.
51. N. Nie, D. Zhang, Z. Wang, Y. Qin, X. Zhai, B. Yang, J. Lai and L. Wang, *Small*, 2021, **17**, 2102879.
52. W. Lai, P. Yu, L. Gao, Z. Yang, B. He and H. Huang, *J. Mater. Chem. A*, 2022, **10**, 16834–16841.
53. Z. Zeb, Y. Huang, L. Chen, W. Zhou, M. Liao, Y. Jiang, H. Li, L. Wang, L. Wang, H. Wang, T. Wei, D. Zang, Z. Fan and Y. Wei, *Coordination Chemistry Reviews*, 2023, **482**, 215058.
54. H. Yan, X. Qin, J. C. Liu, L. Cai, P. Xu, J. J. Song, C. Ma, W. W. Wang, Z. Jin and C. J. Jia, *J. Catal.*, 2022, **413**, 703–712.
55. T. Liu, W. Gao, Q. Wang, M. Dou, Z. Zhang and F. Wang, *Angew. Chem. Int. Ed.*, 2020, **59**, 20423–20427.
56. Y. Liu, Y. Chen, Y. Tian, T. Sakthivel, H. Liu, S. Guo, H. Zeng and Z. Dai, *Adv. Mater.*, 2022, **34**, 2203615.
57. Q. Wen, J. Duan, W. Wang, D. Huang, Y. Liu, Y. Shi, J. Fang, A. Nie, H. Li and T. Zhai, *Angew. Chem. Int. Ed.*, 2022, **61**, e202206077.
58. Y. N. Zhou, X. Liu, C. J. Yu, B. Dong, G. Q. Han, H. J. Liu, R. Q. Lv, B. Liu and Y. M. Chai, *J. Mater. Chem. A*, 2023, **11**, 6945–6951.
59. Z. Li, L. Sheng, R. Deng, Z. Zheng, P. Hou, M. Chen, Z. Ma, K. Sun, Y. Wang, Q. Liu, P. Xu, X. Ma and H. Chu, *ACS Energy Lett.*, 2023, **8**, 5136–5142.
60. Z. Liu, H. Zhang, D. Liu, Y. Feng, D. Jia, C. Li, Q. Sun, Y. Zhou, Z. Kang and B. Li, *J. Mater. Chem. A*, 2024, DOI: 10.1039/D3TA07016F.
61. D. Zang, Z. Huo, S. Yang, Q. Li, G. Dai, M. Zeng, L. Ruhlmann and Y. Wei, *Mater. Today Commun.*, 2022, **31**, 103811.
62. M. Sheng, B. Jiang, B. Wu, F. Liao, X. Fan, H. Lin, Y. Li, Y. Lifshitz, S.-T. Lee and M. Shao, *ACS Nano*, 2019, **13**, 2786–2794.
63. J. Li, J. Hu, M. Zhang, W. Gou, S. Zhang, Z. Chen, Y. Qu and Y. Ma, *Nat. Commun.*, 2021, **12**, 3502.
64. B. Ravel and M. Newville, *J. Synchrotron Radiat.*, 2005, **12**, 537–541.
65. S. I. Zabinsky, J. J. Rehr, A. Ankudinov, R. C. Albers and M. J. Eller, *Phys. Rev. B*, 1995, **52**, 2995–3009.
66. Y. Huang, Q. Gong, X. Song, K. Feng, K. Nie, F. Zhao, Y. Wang, M. Zeng, J. Zhong and Y. Li, *ACS Nano*, 2016, **10**, 11337–11343.
67. X. Xiao, Z. Li, Y. Xiong and Y. W. Yang, *J. Am. Chem. Soc.*, 2023, **145**, 16548–16556.
